# Supplementary material for: The Dynamics of Genetic Interactions between Vibrio metoecus and Vibrio cholerae, Two Close Relatives Co-Occurring in the Environment
Source: PubMed Central journal article supplement — Genome Biol Evol. 2015 Oct 9;7(10):2941–54. doi: 10.1093/gbe/evv193 (PMC4684700; doi:10.1093/gbe/evv193), 2015-10-09
Supplement: supp_evv193_Supplementary_Files.pdf [file supp_evv193_Supplementary_Files.pdf]

**The Dynamics of Genetic Interactions Between *Vibrio metoecus* and *Vibrio cholerae*, Two Close Relatives Co-Occurring in the Environment**

**SUPPLEMENTARY TABLES AND FIGURES**

Fabini D. Orata<sup>1</sup>, Paul C. Kirchberger<sup>1</sup>, Raphaël Méheust<sup>2</sup>,  
E. Jed Barlow<sup>3</sup>, Cheryl L. Tarr<sup>4</sup>, Yan Boucher<sup>1</sup>

<sup>1</sup> Department of Biological Sciences, University of Alberta, Edmonton, AB, Canada

<sup>2</sup> Unité Mixte de Recherche 7138, Evolution Paris-Seine, Institut de Biologie Paris-Seine, Université Pierre et Marie Curie, Paris, France

<sup>3</sup> Department of Computing Science, University of Alberta, Edmonton, AB, Canada

<sup>4</sup> National Center for Emerging and Zoonotic Infectious Diseases, Centers for Disease Control and Prevention, Atlanta, GA, USA

# Orata et al. Genetic Interactions Between *V. metoecus* and *V. cholerae*

**Table S1**

Source and year of isolation of the *V. metoecus* and *V. cholerae* strains used in this study. The genome sequences are available from the DDBJ, EMBL, and GenBank databases.

| Species                | Strain      | Geographical Origin             | Source of Isolation  | Year of Isolation | Accession Number/s | Reference/s                            |
|------------------------|-------------|---------------------------------|----------------------|-------------------|--------------------|----------------------------------------|
| <i>Vibrio metoecus</i> | 06-2478     | Mississippi, USA                | Clinical (stool)     | 2006              | LCUD00000000       | This study                             |
| <i>Vibrio metoecus</i> | 07-2435     | North Carolina, USA             | Clinical (leg wound) | 2007              | LCUE00000000       | This study                             |
| <i>Vibrio metoecus</i> | 08-2459     | North Carolina, USA             | Clinical (blood)     | 2008              | LCUF00000000       | This study                             |
| <i>Vibrio metoecus</i> | 2010V-1005  | USA                             | Clinical (ear)       | 2010              | LCUG00000000       | This study                             |
| <i>Vibrio metoecus</i> | YB4D01      | Oyster Pond, Massachusetts, USA | Water                | 2009              | LBGO00000000       | This study                             |
| <i>Vibrio metoecus</i> | YB5B04      | Oyster Pond, Massachusetts, USA | Water                | 2009              | LBGP00000000       | This study                             |
| <i>Vibrio metoecus</i> | YB5B06      | Oyster Pond, Massachusetts, USA | Water                | 2009              | LBGQ00000000       | This study                             |
| <i>Vibrio metoecus</i> | YB9D03      | Oyster Pond, Massachusetts, USA | Water                | 2009              | LBGR00000000       | This study                             |
| <i>Vibrio metoecus</i> | OP3H        | Oyster Pond, Massachusetts, USA | Water                | 2006              | JJMN00000000       | Kirchberger et al. 2014                |
| <i>Vibrio metoecus</i> | RC341       | Chesapeake Bay, Maryland, USA   | Water                | 1998              | ACZT00000000       | Haley et al. 2010a                     |
| <i>Vibrio cholerae</i> | YB1A01      | Oyster Pond, Massachusetts, USA | Water                | 2009              | LBCL00000000       | This study                             |
| <i>Vibrio cholerae</i> | YB1G06      | Oyster Pond, Massachusetts, USA | Water                | 2009              | LBFW00000000       | This study                             |
| <i>Vibrio cholerae</i> | YB2A05      | Oyster Pond, Massachusetts, USA | Water                | 2009              | LBFW00000000       | This study                             |
| <i>Vibrio cholerae</i> | YB2A06      | Oyster Pond, Massachusetts, USA | Water                | 2009              | LBFX00000000       | This study                             |
| <i>Vibrio cholerae</i> | YB2G01      | Oyster Pond, Massachusetts, USA | Water                | 2009              | LBFY00000000       | This study                             |
| <i>Vibrio cholerae</i> | YB2G05      | Oyster Pond, Massachusetts, USA | Water                | 2009              | LBFZ00000000       | This study                             |
| <i>Vibrio cholerae</i> | YB2G07      | Oyster Pond, Massachusetts, USA | Water                | 2009              | LBGA00000000       | This study                             |
| <i>Vibrio cholerae</i> | YB3B05      | Oyster Pond, Massachusetts, USA | Water                | 2009              | LBGB00000000       | This study                             |
| <i>Vibrio cholerae</i> | YB3G04      | Oyster Pond, Massachusetts, USA | Water                | 2009              | LBGC00000000       | This study                             |
| <i>Vibrio cholerae</i> | YB4B03      | Oyster Pond, Massachusetts, USA | Water                | 2009              | LBGD00000000       | This study                             |
| <i>Vibrio cholerae</i> | YB4C07      | Oyster Pond, Massachusetts, USA | Water                | 2009              | LBGE00000000       | This study                             |
| <i>Vibrio cholerae</i> | YB4F05      | Oyster Pond, Massachusetts, USA | Water                | 2009              | LBGF00000000       | This study                             |
| <i>Vibrio cholerae</i> | YB4G05      | Oyster Pond, Massachusetts, USA | Water                | 2009              | LBGG00000000       | This study                             |
| <i>Vibrio cholerae</i> | YB4G06      | Oyster Pond, Massachusetts, USA | Water                | 2009              | LBGH00000000       | This study                             |
| <i>Vibrio cholerae</i> | YB4H02      | Oyster Pond, Massachusetts, USA | Water                | 2009              | LBGI00000000       | This study                             |
| <i>Vibrio cholerae</i> | YB5A06      | Oyster Pond, Massachusetts, USA | Water                | 2009              | LBGJ00000000       | This study                             |
| <i>Vibrio cholerae</i> | YB6A06      | Oyster Pond, Massachusetts, USA | Water                | 2009              | LBGK00000000       | This study                             |
| <i>Vibrio cholerae</i> | YB7A06      | Oyster Pond, Massachusetts, USA | Water                | 2009              | LBGL00000000       | This study                             |
| <i>Vibrio cholerae</i> | YB7A09      | Oyster Pond, Massachusetts, USA | Water                | 2009              | LBGM00000000       | This study                             |
| <i>Vibrio cholerae</i> | YB8E08      | Oyster Pond, Massachusetts, USA | Water                | 2009              | LBGN00000000       | This study                             |
| <i>Vibrio cholerae</i> | 12129(1)    | Australia                       | Water                | 1985              | ACFQ00000000       | Chun et al. 2009                       |
| <i>Vibrio cholerae</i> | 1587        | Lima, Peru                      | Clinical             | 1994              | AAUR00000000       | Chun et al. 2009                       |
| <i>Vibrio cholerae</i> | 2010EL-1786 | Artibonite, Haiti               | Clinical             | 2010              | CP003069; CP003070 | Reimer et al. 2011                     |
| <i>Vibrio cholerae</i> | 2740-80     | Gulf Coast, USA                 | Water                | 1980              | AAUT00000000       | Chun et al. 2009                       |
| <i>Vibrio cholerae</i> | 623-39      | Bangladesh                      | Water                | 2002              | AAWG00000000       | Chun et al. 2009                       |
| <i>Vibrio cholerae</i> | 877-163     | Bangladesh                      | Water                | 2002              | LBNV00000000       | This study                             |
| <i>Vibrio cholerae</i> | AM-19226    | Bangladesh                      | Clinical             | 2001              | AATY00000000       | Chun et al. 2009                       |
| <i>Vibrio cholerae</i> | BX 330286   | Australia                       | Water                | 1986              | ACIA00000000       | Chun et al. 2009; Haley et al. 2010b   |
| <i>Vibrio cholerae</i> | CIRS101     | Dhaka, Bangladesh               | Clinical             | 2002              | ACVW00000000       | Chun et al. 2009; Grim CJ, et al. 2010 |
| <i>Vibrio cholerae</i> | MAK757      | Sulawesi, Indonesia             | Clinical             | 1937              | AAUS00000000       | Chun et al. 2009                       |
| <i>Vibrio cholerae</i> | MJ-1236     | Matlab, Bangladesh              | Clinical             | 1994              | CP001485; CP001486 | Chun et al. 2009; Grim CJ, et al. 2010 |
| <i>Vibrio cholerae</i> | MO10        | Madras, India                   | Clinical             | 1992              | AAKF00000000       | Chun et al. 2009                       |
| <i>Vibrio cholerae</i> | MZO-2       | Bangladesh                      | Clinical             | 2001              | AAWF00000000       | Chun et al. 2009                       |
| <i>Vibrio cholerae</i> | MZO-3       | Bangladesh                      | Clinical             | 2001              | AAUU00000000       | Chun et al. 2009                       |
| <i>Vibrio cholerae</i> | N16961      | Bangladesh                      | Clinical             | 1971              | AE003852; AE003853 | Heidelberg et al. 2000                 |
| <i>Vibrio cholerae</i> | O395        | India                           | Clinical             | 1965              | CP001235; CP001236 | Feng et al. 2008                       |
| <i>Vibrio cholerae</i> | RC385       | Chesapeake Bay, Maryland, USA   | Plankton             | 1998              | AAKH00000000       | Chun et al. 2009                       |
| <i>Vibrio cholerae</i> | TM 11079-80 | Brazil                          | Sewage               | 1980              | ACHW00000000       | Chun et al. 2009                       |
| <i>Vibrio cholerae</i> | TMA21       | Brazil                          | Seawater             | 1982              | ACHY00000000       | Chun et al. 2009                       |
| <i>Vibrio cholerae</i> | V51         | USA                             | Clinical             | 1987              | AAKI00000000       | Chun et al. 2009                       |
| <i>Vibrio cholerae</i> | V52         | Sudan                           | Clinical             | 1968              | AAKJ00000000       | Chun et al. 2009                       |
| <i>Vibrio cholerae</i> | VL426       | Maidstone, Kent, UK             | Water                | Unknown           | ACHV00000000       | Chun et al. 2009                       |

**Literature Cited**

Chun J, et al. 2009. Comparative genomics reveals mechanism for short-term and long-term clonal transitions in pandemic *Vibrio cholerae*. Proc Natl Acad Sci USA. 106:15442-15447.

Feng L, et al. 2008. A recalibrated molecular clock and independent origins for the cholera pandemic clones. PLoS One. 3:e4053.

Grim CJ, et al. 2010. Genome sequence of hybrid *Vibrio cholerae* O1 MJ-1236, B-33, and CIRS101 and comparative genomics with *V. cholerae*. J Bacteriol. 192:3524-3533.

Haley BJ, et al. 2010a. Comparative genomic analysis reveals evidence of two novel *Vibrio* species closely related to *V. cholerae*. BMC Microbiol. 10:154.

Haley BJ, et al. 2010b. The pre-seventh pandemic *Vibrio cholerae* BX 330286 El Tor genome: evidence for the environment as a genome reservoir. Environ Microbiol Rep. 2:208-216.

Heidelberg JF, et al. 2000. DNA sequence of both chromosomes of the cholera pathogen *Vibrio cholerae*. Nature. 406:477-483.

Kirchberger PC, et al. 2014. *Vibrio metoecus* sp. nov., a close relative of *Vibrio cholerae* isolated from coastal brackish ponds and clinical specimens. Int J Syst Evol Microbiol. 64:3208-3214.

Reimer AR, et al. 2011. Comparative genomics of *Vibrio cholerae* from Haiti, Asia, and Africa. Emerg Infect Dis. 17:2113-2121.

**Table S2**

Percentage of genes shared and the ANI of the core genome (from 1,560 single-copy core genes,  $\approx$  1.42 mbp) and the chromosomal integron region from intra- and interspecies pairwise comparison of *V. cholerae* (Vc) and *V. metoecus* (Vm) strains.

| Strain 1  | Strain 2       | Unique Genes 1 <sup>a</sup> | Unique Genes 2 <sup>b</sup> | Core Genes | % Shared 1 <sup>c</sup> | % Shared 2 <sup>d</sup> | ANI Core (%) | ANI Integron (%) |
|-----------|----------------|-----------------------------|-----------------------------|------------|-------------------------|-------------------------|--------------|------------------|
| Vc MZO-3  | Vc N16961      | 405                         | 634                         | 2,985      | 88.05                   | 82.48                   | 98.51        | 96.40            |
| Vc MZO-3  | Vc O395        | 359                         | 582                         | 3,031      | 89.41                   | 83.89                   | 98.50        | 94.83            |
| Vc MZO-3  | Vc RC385       | 413                         | 588                         | 2,977      | 87.82                   | 83.51                   | 98.00        | 94.19            |
| Vc MZO-3  | Vc TM 11079-80 | 436                         | 532                         | 2,954      | 87.14                   | 84.74                   | 98.27        | 94.17            |
| Vc MZO-3  | Vc VL426       | 439                         | 412                         | 2,951      | 87.05                   | 87.75                   | 98.02        | 93.33            |
| Vc MZO-3  | Vc YB1A01      | 457                         | 492                         | 2,933      | 86.52                   | 85.64                   | 98.12        | 93.68            |
| Vc MZO-3  | Vc YB1G06      | 401                         | 486                         | 2,989      | 88.17                   | 86.01                   | 98.17        | 93.53            |
| Vc MZO-3  | Vc YB2A06      | 361                         | 612                         | 3,029      | 89.35                   | 83.19                   | 98.28        | 94.05            |
| Vc MZO-3  | Vc YB4B03      | 333                         | 455                         | 3,057      | 90.18                   | 87.04                   | 98.51        | 93.04            |
| Vc MZO-3  | Vc YB4C07      | 245                         | 455                         | 3,145      | 92.77                   | 87.36                   | 98.66        | 95.36            |
| Vc MZO-3  | Vm 06-2478     | 543                         | 734                         | 2,847      | 83.98                   | 79.50                   | 86.55        | 93.78            |
| Vc MZO-3  | Vm 07-2435     | 600                         | 557                         | 2,833      | 82.52                   | 83.57                   | 87.09        | 93.46            |
| Vc MZO-3  | Vm 08-2459     | 852                         | 560                         | 2,830      | 76.86                   | 83.48                   | 86.34        | 94.21            |
| Vc MZO-3  | Vm 2010V-1005  | 512                         | 782                         | 2,878      | 84.90                   | 78.63                   | 86.49        | 93.69            |
| Vc MZO-3  | Vm OP3H        | 527                         | 755                         | 2,863      | 84.45                   | 79.13                   | 86.67        | 93.18            |
| Vc MZO-3  | Vm RC341       | 567                         | 612                         | 2,823      | 83.27                   | 82.18                   | 86.51        | 93.20            |
| Vc MZO-3  | Vm YB4D01      | 524                         | 680                         | 2,866      | 84.54                   | 80.82                   | 86.54        | 93.74            |
| Vc MZO-3  | Vm YB5B04      | 691                         | 475                         | 2,915      | 80.84                   | 85.99                   | 86.52        | 92.84            |
| Vc MZO-3  | Vm YB5B06      | 663                         | 583                         | 2,807      | 80.89                   | 82.80                   | 86.48        | 92.69            |
| Vc MZO-3  | Vm YB9D03      | 553                         | 683                         | 2,837      | 83.69                   | 80.60                   | 86.47        | 95.17            |
| Vc N16961 | Vc O395        | 300                         | 294                         | 3,319      | 91.71                   | 91.86                   | 99.36        | 99.19            |
| Vc N16961 | Vc RC385       | 497                         | 551                         | 3,068      | 86.06                   | 84.77                   | 98.02        | 95.32            |
| Vc N16961 | Vc TM 11079-80 | 379                         | 512                         | 3,107      | 89.13                   | 85.85                   | 98.26        | 94.79            |
| Vc N16961 | Vc VL426       | 327                         | 583                         | 3,036      | 90.28                   | 83.89                   | 98.09        | 92.90            |
| Vc N16961 | Vc YB1A01      | 538                         | 344                         | 3,081      | 85.13                   | 89.96                   | 98.22        | 95.23            |
| Vc N16961 | Vc YB1G06      | 385                         | 529                         | 3,090      | 88.92                   | 85.38                   | 98.23        | 94.92            |
| Vc N16961 | Vc YB2A06      | 483                         | 461                         | 3,158      | 86.73                   | 87.26                   | 98.33        | 94.90            |
| Vc N16961 | Vc YB4B03      | 373                         | 480                         | 3,139      | 89.38                   | 86.74                   | 98.49        | 94.86            |
| Vc N16961 | Vc YB4C07      | 419                         | 438                         | 3,181      | 88.36                   | 87.90                   | 98.57        | 96.24            |
| Vc N16961 | Vm 06-2478     | 587                         | 625                         | 2,994      | 83.61                   | 82.73                   | 86.49        | 92.70            |
| Vc N16961 | Vm 07-2435     | 458                         | 644                         | 2,975      | 86.66                   | 82.21                   | 87.04        | 94.69            |
| Vc N16961 | Vm 08-2459     | 698                         | 635                         | 2,984      | 81.04                   | 82.45                   | 86.31        | 94.44            |
| Vc N16961 | Vm 2010V-1005  | 656                         | 615                         | 3,004      | 82.08                   | 83.01                   | 86.45        | 94.83            |
| Vc N16961 | Vm OP3H        | 638                         | 637                         | 2,981      | 82.37                   | 82.39                   | 86.63        | 94.27            |
| Vc N16961 | Vm RC341       | 524                         | 708                         | 2,911      | 84.75                   | 80.44                   | 86.49        | 93.81            |
| Vc N16961 | Vm YB4D01      | 560                         | 633                         | 2,986      | 84.21                   | 82.51                   | 86.49        | 94.95            |
| Vc N16961 | Vm YB5B04      | 609                         | 622                         | 2,997      | 83.11                   | 82.81                   | 86.48        | 95.18            |
| Vc N16961 | Vm YB5B06      | 486                         | 635                         | 2,984      | 85.99                   | 82.45                   | 86.48        | 91.89            |
| Vc N16961 | Vm YB9D03      | 521                         | 620                         | 2,999      | 85.20                   | 82.87                   | 86.42        | 95.43            |
| Vc O395   | Vc RC385       | 448                         | 496                         | 3,117      | 87.43                   | 86.27                   | 98.01        | 93.90            |
| Vc O395   | Vc TM 11079-80 | 272                         | 399                         | 3,214      | 92.20                   | 88.96                   | 98.25        | 93.70            |
| Vc O395   | Vc VL426       | 274                         | 524                         | 3,089      | 91.85                   | 85.50                   | 98.07        | 92.74            |
| Vc O395   | Vc YB1A01      | 287                         | 475                         | 3,138      | 91.62                   | 86.85                   | 98.21        | 93.85            |
| Vc O395   | Vc YB1G06      | 328                         | 466                         | 3,147      | 90.56                   | 87.10                   | 98.23        | 93.51            |
| Vc O395   | Vc YB2A06      | 390                         | 362                         | 3,251      | 89.29                   | 89.98                   | 98.31        | 94.35            |
| Vc O395   | Vc YB4B03      | 321                         | 422                         | 3,191      | 90.86                   | 88.32                   | 98.48        | 94.29            |
| Vc O395   | Vc YB4C07      | 350                         | 363                         | 3,250      | 90.28                   | 89.95                   | 98.57        | 95.12            |
| Vc O395   | Vm 06-2478     | 549                         | 581                         | 3,032      | 84.67                   | 83.92                   | 86.47        | 92.80            |
| Vc O395   | Vm 07-2435     | 404                         | 584                         | 3,029      | 88.23                   | 83.84                   | 87.02        | 93.18            |
| Vc O395   | Vm 08-2459     | 657                         | 588                         | 3,025      | 82.16                   | 83.73                   | 86.28        | 93.26            |
| Vc O395   | Vm 2010V-1005  | 622                         | 575                         | 3,038      | 83.01                   | 84.09                   | 86.42        | 94.29            |
| Vc O395   | Vm OP3H        | 606                         | 601                         | 3,012      | 83.25                   | 83.37                   | 86.60        | 93.67            |
| Vc O395   | Vm RC341       | 491                         | 669                         | 2,944      | 85.71                   | 81.48                   | 86.47        | 92.89            |
| Vc O395   | Vm YB4D01      | 516                         | 583                         | 3,030      | 85.45                   | 83.86                   | 86.47        | 94.14            |
| Vc O395   | Vm YB5B04      | 565                         | 572                         | 3,041      | 84.33                   | 84.17                   | 86.45        | 94.35            |
| Vc O395   | Vm YB5B06      | 430                         | 573                         | 3,040      | 87.61                   | 84.14                   | 86.45        | 92.79            |
| Vc O395   | Vm YB9D03      | 485                         | 578                         | 3,035      | 86.22                   | 84.00                   | 86.39        | 94.56            |
| Vc RC385  | Vc TM 11079-80 | 492                         | 413                         | 3,073      | 86.20                   | 88.15                   | 97.89        | 93.49            |
| Vc RC385  | Vc VL426       | 236                         | 438                         | 3,127      | 92.98                   | 87.71                   | 97.95        | 93.38            |
| Vc RC385  | Vc YB1A01      | 399                         | 259                         | 3,166      | 88.81                   | 92.44                   | 98.29        | 94.29            |
| Vc RC385  | Vc YB1G06      | 365                         | 275                         | 3,200      | 89.76                   | 92.09                   | 98.25        | 93.33            |
| Vc RC385  | Vc YB2A06      | 439                         | 515                         | 3,126      | 87.69                   | 85.86                   | 98.04        | 93.40            |
| Vc RC385  | Vc YB4B03      | 375                         | 428                         | 3,137      | 89.32                   | 87.99                   | 98.08        | 92.10            |
| Vc RC385  | Vc YB4C07      | 487                         | 452                         | 3,113      | 86.47                   | 87.32                   | 98.00        | 93.36            |
| Vc RC385  | Vm 06-2478     | 583                         | 599                         | 2,982      | 83.65                   | 83.27                   | 86.52        | 93.83            |
| Vc RC385  | Vm 07-2435     | 504                         | 636                         | 2,929      | 85.32                   | 82.16                   | 86.90        | 92.51            |
| Vc RC385  | Vm 08-2459     | 745                         | 628                         | 2,937      | 79.77                   | 82.38                   | 86.27        | 93.74            |
| Vc RC385  | Vm 2010V-1005  | 556                         | 651                         | 3,009      | 84.40                   | 82.21                   | 86.41        | 93.10            |
| Vc RC385  | Vm OP3H        | 638                         | 691                         | 2,927      | 82.10                   | 80.90                   | 86.57        | 92.86            |

Orata et al. Genetic Interactions Between *V. metoecus* and *V. cholerae*

|                |               |     |     |       |       |       |       |       |
|----------------|---------------|-----|-----|-------|-------|-------|-------|-------|
| Vc RC385       | Vm RC341      | 502 | 632 | 2,933 | 85.39 | 82.27 | 86.44 | 91.49 |
| Vc RC385       | Vm YB4D01     | 578 | 559 | 2,987 | 83.79 | 84.24 | 86.47 | 93.42 |
| Vc RC385       | Vm YB5B04     | 614 | 573 | 2,992 | 82.97 | 83.93 | 86.46 | 93.08 |
| Vc RC385       | Vm YB5B06     | 534 | 629 | 2,936 | 84.61 | 82.36 | 86.43 | 92.51 |
| Vc RC385       | Vm YB9D03     | 614 | 569 | 2,951 | 82.78 | 83.84 | 86.40 | 94.39 |
| Vc TM 11079-80 | Vc VL426      | 326 | 449 | 3,037 | 90.31 | 87.12 | 97.94 | 93.46 |
| Vc TM 11079-80 | Vc YB1A01     | 432 | 371 | 3,054 | 87.61 | 89.17 | 98.06 | 94.17 |
| Vc TM 11079-80 | Vc YB1G06     | 404 | 415 | 3,071 | 88.37 | 88.10 | 98.07 | 94.42 |
| Vc TM 11079-80 | Vc YB2A06     | 519 | 364 | 3,122 | 85.75 | 89.56 | 98.16 | 95.07 |
| Vc TM 11079-80 | Vc YB4B03     | 388 | 362 | 3,124 | 88.95 | 89.62 | 98.31 | 93.72 |
| Vc TM 11079-80 | Vc YB4C07     | 473 | 359 | 3,127 | 86.86 | 89.70 | 98.29 | 95.07 |
| Vc TM 11079-80 | Vm 06-2478    | 599 | 504 | 2,982 | 83.27 | 85.54 | 86.47 | 93.75 |
| Vc TM 11079-80 | Vm 07-2435    | 446 | 499 | 2,987 | 87.01 | 85.69 | 86.97 | 94.09 |
| Vc TM 11079-80 | Vm 08-2459    | 735 | 539 | 2,947 | 80.04 | 84.54 | 86.22 | 93.79 |
| Vc TM 11079-80 | Vm 2010V-1005 | 672 | 498 | 2,988 | 81.64 | 85.71 | 86.43 | 93.81 |
| Vc TM 11079-80 | Vm OP3H       | 517 | 649 | 2,969 | 85.17 | 82.06 | 86.57 | 93.20 |
| Vc TM 11079-80 | Vm RC341      | 563 | 614 | 2,872 | 83.61 | 82.39 | 86.39 | 90.77 |
| Vc TM 11079-80 | Vm YB4D01     | 554 | 494 | 2,992 | 84.38 | 85.83 | 86.44 | 91.32 |
| Vc TM 11079-80 | Vm YB5B04     | 612 | 492 | 2,994 | 83.03 | 85.89 | 86.42 | 91.93 |
| Vc TM 11079-80 | Vm YB5B06     | 477 | 493 | 2,993 | 86.25 | 85.86 | 86.39 | 93.77 |
| Vc TM 11079-80 | Vm YB9D03     | 539 | 505 | 2,981 | 84.69 | 85.51 | 86.39 | 95.18 |
| Vc VL426       | Vc YB1A01     | 236 | 298 | 3,127 | 92.98 | 91.30 | 98.20 | 93.67 |
| Vc VL426       | Vc YB1G06     | 203 | 315 | 3,160 | 93.96 | 90.94 | 98.15 | 95.22 |
| Vc VL426       | Vc YB2A06     | 262 | 540 | 3,101 | 92.21 | 85.17 | 97.99 | 94.88 |
| Vc VL426       | Vc YB4B03     | 397 | 248 | 3,115 | 88.70 | 92.63 | 98.04 | 94.15 |
| Vc VL426       | Vc YB4C07     | 486 | 249 | 3,114 | 86.50 | 92.60 | 98.02 | 92.52 |
| Vc VL426       | Vm 06-2478    | 432 | 650 | 2,931 | 87.15 | 81.85 | 86.42 | 95.30 |
| Vc VL426       | Vm 07-2435    | 525 | 455 | 2,908 | 84.71 | 86.47 | 86.92 | 94.35 |
| Vc VL426       | Vm 08-2459    | 787 | 468 | 2,895 | 78.63 | 86.08 | 86.21 | 94.31 |
| Vc VL426       | Vm 2010V-1005 | 415 | 712 | 2,948 | 87.66 | 80.55 | 86.36 | 94.92 |
| Vc VL426       | Vm OP3H       | 448 | 703 | 2,915 | 86.68 | 80.57 | 86.54 | 93.09 |
| Vc VL426       | Vm RC341      | 552 | 480 | 2,883 | 83.93 | 85.73 | 86.36 | 91.69 |
| Vc VL426       | Vm YB4D01     | 408 | 591 | 2,955 | 87.87 | 83.33 | 86.41 | 93.94 |
| Vc VL426       | Vm YB5B04     | 647 | 404 | 2,959 | 82.06 | 87.99 | 86.37 | 93.00 |
| Vc VL426       | Vm YB5B06     | 551 | 444 | 2,919 | 84.12 | 86.80 | 86.36 | 93.99 |
| Vc VL426       | Vm YB9D03     | 450 | 607 | 2,913 | 86.62 | 82.76 | 86.33 | 95.70 |
| Vc YB1A01      | Vc YB1G06     | 253 | 203 | 3,222 | 92.72 | 94.07 | 98.64 | 94.48 |
| Vc YB1A01      | Vc YB2A06     | 494 | 278 | 3,147 | 86.43 | 91.88 | 98.25 | 94.16 |
| Vc YB1A01      | Vc YB4B03     | 377 | 290 | 3,135 | 89.27 | 91.53 | 98.25 | 93.59 |
| Vc YB1A01      | Vc YB4C07     | 453 | 278 | 3,147 | 87.42 | 91.88 | 98.17 | 93.96 |
| Vc YB1A01      | Vm 06-2478    | 625 | 469 | 2,956 | 82.55 | 86.31 | 86.50 | 92.35 |
| Vc YB1A01      | Vm 07-2435    | 491 | 483 | 2,942 | 85.70 | 85.90 | 86.96 | 92.34 |
| Vc YB1A01      | Vm 08-2459    | 738 | 481 | 2,944 | 79.96 | 85.96 | 86.27 | 92.71 |
| Vc YB1A01      | Vm 2010V-1005 | 702 | 467 | 2,958 | 80.82 | 86.36 | 86.42 | 93.95 |
| Vc YB1A01      | Vm OP3H       | 480 | 673 | 2,945 | 85.99 | 81.40 | 86.60 | 93.17 |
| Vc YB1A01      | Vm RC341      | 543 | 533 | 2,892 | 84.19 | 84.44 | 86.43 | 92.68 |
| Vc YB1A01      | Vm YB4D01     | 575 | 454 | 2,971 | 83.78 | 86.74 | 86.48 | 93.42 |
| Vc YB1A01      | Vm YB5B04     | 634 | 453 | 2,972 | 82.42 | 86.77 | 86.44 | 93.27 |
| Vc YB1A01      | Vm YB5B06     | 515 | 470 | 2,955 | 85.16 | 86.28 | 86.43 | 90.84 |
| Vc YB1A01      | Vm YB9D03     | 562 | 467 | 2,958 | 84.03 | 86.36 | 86.41 | 94.30 |
| Vc YB1G06      | Vc YB2A06     | 472 | 306 | 3,169 | 87.04 | 91.19 | 98.22 | 93.79 |
| Vc YB1G06      | Vc YB4B03     | 333 | 296 | 3,179 | 90.52 | 91.48 | 98.26 | 94.02 |
| Vc YB1G06      | Vc YB4C07     | 437 | 312 | 3,163 | 87.86 | 91.02 | 98.21 | 94.58 |
| Vc YB1G06      | Vm 06-2478    | 482 | 588 | 2,993 | 86.13 | 83.58 | 86.49 | 93.55 |
| Vc YB1G06      | Vm 07-2435    | 487 | 529 | 2,946 | 85.81 | 84.78 | 86.99 | 93.17 |
| Vc YB1G06      | Vm 08-2459    | 728 | 521 | 2,954 | 80.23 | 85.01 | 86.29 | 95.07 |
| Vc YB1G06      | Vm 2010V-1005 | 462 | 647 | 3,013 | 86.71 | 82.32 | 86.47 | 94.13 |
| Vc YB1G06      | Vm OP3H       | 518 | 661 | 2,957 | 85.09 | 81.73 | 86.64 | 93.30 |
| Vc YB1G06      | Vm RC341      | 518 | 558 | 2,917 | 84.92 | 83.94 | 86.46 | 93.78 |
| Vc YB1G06      | Vm YB4D01     | 473 | 544 | 3,002 | 86.39 | 84.66 | 86.53 | 93.06 |
| Vc YB1G06      | Vm YB5B04     | 588 | 457 | 3,018 | 83.69 | 86.85 | 86.46 | 92.57 |
| Vc YB1G06      | Vm YB5B06     | 507 | 512 | 2,963 | 85.39 | 85.27 | 86.45 | 92.10 |
| Vc YB1G06      | Vm YB9D03     | 534 | 489 | 2,986 | 84.83 | 85.93 | 86.43 | 95.18 |
| Vc YB2A06      | Vc YB4B03     | 250 | 379 | 3,262 | 92.88 | 89.59 | 98.38 | 93.92 |
| Vc YB2A06      | Vc YB4C07     | 366 | 407 | 3,234 | 89.83 | 88.82 | 98.35 | 93.54 |
| Vc YB2A06      | Vm 06-2478    | 609 | 549 | 3,032 | 83.27 | 84.67 | 86.58 | 92.12 |
| Vc YB2A06      | Vm 07-2435    | 406 | 614 | 3,027 | 88.17 | 83.14 | 87.09 | 92.66 |
| Vc YB2A06      | Vm 08-2459    | 660 | 619 | 3,022 | 82.07 | 83.00 | 86.39 | 92.59 |
| Vc YB2A06      | Vm 2010V-1005 | 587 | 606 | 3,054 | 83.88 | 83.44 | 86.50 | 93.99 |
| Vc YB2A06      | Vm OP3H       | 607 | 584 | 3,034 | 83.33 | 83.86 | 86.71 | 93.63 |
| Vc YB2A06      | Vm RC341      | 477 | 683 | 2,958 | 86.11 | 81.24 | 86.55 | 92.21 |
| Vc YB2A06      | Vm YB4D01     | 605 | 510 | 3,036 | 83.38 | 85.62 | 86.57 | 93.42 |
| Vc YB2A06      | Vm YB5B04     | 563 | 598 | 3,043 | 84.39 | 83.58 | 86.50 | 92.91 |
| Vc YB2A06      | Vm YB5B06     | 439 | 610 | 3,031 | 87.35 | 83.25 | 86.54 | 93.46 |

Orata et al. Genetic Interactions Between *V. metoecus* and *V. cholerae*

|               |               |     |     |       |       |       |       |       |
|---------------|---------------|-----|-----|-------|-------|-------|-------|-------|
| Vc YB2A06     | Vm YB9D03     | 457 | 578 | 3,063 | 87.02 | 84.13 | 86.48 | 94.26 |
| Vc YB4B03     | Vc YB4C07     | 375 | 287 | 3,225 | 89.58 | 91.83 | 98.51 | 94.72 |
| Vc YB4B03     | Vm 06-2478    | 454 | 523 | 3,058 | 87.07 | 85.40 | 86.52 | 92.53 |
| Vc YB4B03     | Vm 07-2435    | 415 | 494 | 3,018 | 87.91 | 85.93 | 87.02 | 92.76 |
| Vc YB4B03     | Vm 08-2459    | 680 | 510 | 3,002 | 81.53 | 85.48 | 86.31 | 93.65 |
| Vc YB4B03     | Vm 2010V-1005 | 468 | 616 | 3,044 | 86.67 | 83.17 | 86.46 | 93.33 |
| Vc YB4B03     | Vm OP3H       | 509 | 615 | 3,003 | 85.51 | 83.00 | 86.65 | 93.72 |
| Vc YB4B03     | Vm RC341      | 473 | 550 | 2,962 | 86.23 | 84.34 | 86.48 | 90.46 |
| Vc YB4B03     | Vm YB4D01     | 452 | 486 | 3,060 | 87.13 | 86.29 | 86.51 | 93.31 |
| Vc YB4B03     | Vm YB5B04     | 532 | 438 | 3,074 | 85.25 | 87.53 | 86.48 | 91.69 |
| Vc YB4B03     | Vm YB5B06     | 461 | 503 | 3,009 | 86.71 | 85.68 | 86.47 | 90.91 |
| Vc YB4B03     | Vm YB9D03     | 500 | 508 | 3,012 | 85.76 | 85.57 | 86.44 | 94.02 |
| Vc YB4C07     | Vm 06-2478    | 575 | 556 | 3,025 | 84.03 | 84.47 | 86.53 | 92.40 |
| Vc YB4C07     | Vm 07-2435    | 414 | 581 | 3,019 | 87.94 | 83.86 | 87.11 | 93.71 |
| Vc YB4C07     | Vm 08-2459    | 674 | 592 | 3,008 | 81.69 | 83.56 | 86.32 | 93.08 |
| Vc YB4C07     | Vm 2010V-1005 | 568 | 628 | 3,032 | 84.22 | 82.84 | 86.45 | 94.34 |
| Vc YB4C07     | Vm OP3H       | 544 | 562 | 3,056 | 84.89 | 84.47 | 86.64 | 94.52 |
| Vc YB4C07     | Vm RC341      | 484 | 649 | 2,951 | 85.91 | 81.97 | 86.50 | 92.73 |
| Vc YB4C07     | Vm YB4D01     | 562 | 508 | 3,038 | 84.39 | 85.67 | 86.53 | 95.14 |
| Vc YB4C07     | Vm YB5B04     | 528 | 522 | 3,078 | 85.36 | 85.50 | 86.51 | 94.35 |
| Vc YB4C07     | Vm YB5B06     | 457 | 587 | 3,013 | 86.83 | 83.69 | 86.50 | 91.59 |
| Vc YB4C07     | Vm YB9D03     | 570 | 490 | 3,030 | 84.17 | 86.08 | 86.43 | 93.75 |
| Vm 06-2478    | Vm 07-2435    | 266 | 414 | 3,167 | 92.25 | 88.44 | 93.61 | 93.51 |
| Vm 06-2478    | Vm 08-2459    | 439 | 338 | 3,243 | 88.08 | 90.56 | 97.59 | 93.04 |
| Vm 06-2478    | Vm 2010V-1005 | 366 | 287 | 3,294 | 90.00 | 91.99 | 97.89 | 94.62 |
| Vm 06-2478    | Vm OP3H       | 344 | 381 | 3,237 | 90.39 | 89.47 | 97.48 | 93.02 |
| Vm 06-2478    | Vm RC341      | 289 | 435 | 3,146 | 91.59 | 87.85 | 97.81 | 92.15 |
| Vm 06-2478    | Vm YB4D01     | 281 | 316 | 3,265 | 92.08 | 91.18 | 97.69 | 93.91 |
| Vm 06-2478    | Vm YB5B04     | 281 | 256 | 3,325 | 92.21 | 92.85 | 98.17 | 94.09 |
| Vm 06-2478    | Vm YB5B06     | 251 | 362 | 3,219 | 92.77 | 89.89 | 97.68 | 90.99 |
| Vm 06-2478    | Vm YB9D03     | 249 | 310 | 3,271 | 92.93 | 91.34 | 97.78 | 93.49 |
| Vm 07-2435    | Vm 08-2459    | 537 | 288 | 3,145 | 85.42 | 91.61 | 93.62 | 93.34 |
| Vm 07-2435    | Vm 2010V-1005 | 280 | 507 | 3,153 | 91.84 | 86.15 | 93.48 | 92.83 |
| Vm 07-2435    | Vm OP3H       | 290 | 475 | 3,143 | 91.55 | 86.87 | 93.71 | 93.33 |
| Vm 07-2435    | Vm RC341      | 404 | 406 | 3,029 | 88.23 | 88.18 | 93.54 | 91.71 |
| Vm 07-2435    | Vm YB4D01     | 274 | 387 | 3,159 | 92.02 | 89.09 | 93.79 | 93.73 |
| Vm 07-2435    | Vm YB5B04     | 434 | 261 | 3,172 | 87.96 | 92.40 | 93.77 | 93.56 |
| Vm 07-2435    | Vm YB5B06     | 309 | 272 | 3,161 | 91.10 | 92.08 | 93.79 | 90.56 |
| Vm 07-2435    | Vm YB9D03     | 255 | 342 | 3,178 | 92.57 | 90.28 | 93.70 | 94.12 |
| Vm 08-2459    | Vm 2010V-1005 | 404 | 382 | 3,278 | 89.03 | 89.56 | 97.70 | 93.36 |
| Vm 08-2459    | Vm OP3H       | 447 | 383 | 3,235 | 87.86 | 89.41 | 97.46 | 92.64 |
| Vm 08-2459    | Vm RC341      | 588 | 341 | 3,094 | 84.03 | 90.07 | 97.66 | 92.29 |
| Vm 08-2459    | Vm YB4D01     | 492 | 356 | 3,190 | 86.64 | 89.96 | 97.58 | 92.90 |
| Vm 08-2459    | Vm YB5B04     | 410 | 486 | 3,196 | 88.63 | 86.80 | 97.63 | 93.12 |
| Vm 08-2459    | Vm YB5B06     | 302 | 514 | 3,168 | 91.30 | 86.04 | 97.65 | 90.24 |
| Vm 08-2459    | Vm YB9D03     | 481 | 319 | 3,201 | 86.94 | 90.94 | 97.70 | 93.52 |
| Vm 2010V-1005 | Vm OP3H       | 422 | 380 | 3,238 | 88.47 | 89.50 | 97.57 | 93.00 |
| Vm 2010V-1005 | Vm RC341      | 293 | 518 | 3,142 | 91.47 | 85.85 | 97.93 | 92.66 |
| Vm 2010V-1005 | Vm YB4D01     | 268 | 382 | 3,278 | 92.44 | 89.56 | 97.78 | 93.26 |
| Vm 2010V-1005 | Vm YB5B04     | 348 | 402 | 3,258 | 90.35 | 89.02 | 97.86 | 93.71 |
| Vm 2010V-1005 | Vm YB5B06     | 256 | 446 | 3,214 | 92.62 | 87.81 | 97.78 | 93.10 |
| Vm 2010V-1005 | Vm YB9D03     | 279 | 419 | 3,241 | 92.07 | 88.55 | 97.89 | 94.61 |
| Vm OP3H       | Vm RC341      | 344 | 527 | 3,091 | 89.99 | 85.43 | 97.56 | 92.37 |
| Vm OP3H       | Vm YB4D01     | 250 | 322 | 3,296 | 92.95 | 91.10 | 97.97 | 93.76 |
| Vm OP3H       | Vm YB5B04     | 310 | 322 | 3,296 | 91.40 | 91.10 | 97.46 | 93.79 |
| Vm OP3H       | Vm YB5B06     | 203 | 351 | 3,267 | 94.15 | 90.30 | 97.84 | 92.75 |
| Vm OP3H       | Vm YB9D03     | 277 | 375 | 3,243 | 92.13 | 89.64 | 97.61 | 93.74 |
| Vm RC341      | Vm YB4D01     | 270 | 381 | 3,165 | 92.14 | 89.26 | 97.74 | 92.93 |
| Vm RC341      | Vm YB5B04     | 418 | 247 | 3,188 | 88.41 | 92.81 | 97.79 | 94.70 |
| Vm RC341      | Vm YB5B06     | 378 | 343 | 3,092 | 89.11 | 90.01 | 97.72 | 91.94 |
| Vm RC341      | Vm YB9D03     | 324 | 409 | 3,111 | 90.57 | 88.38 | 97.86 | 94.34 |
| Vm YB4D01     | Vm YB5B04     | 292 | 232 | 3,314 | 91.90 | 93.46 | 97.74 | 93.45 |
| Vm YB4D01     | Vm YB5B06     | 179 | 255 | 3,291 | 94.84 | 92.81 | 98.02 | 90.71 |
| Vm YB4D01     | Vm YB9D03     | 240 | 266 | 3,280 | 93.18 | 92.50 | 97.83 | 93.91 |
| Vm YB5B04     | Vm YB5B06     | 340 | 204 | 3,266 | 90.57 | 94.12 | 97.73 | 91.65 |
| Vm YB5B04     | Vm YB9D03     | 322 | 236 | 3,284 | 91.07 | 93.30 | 97.76 | 94.37 |
| Vm YB5B06     | Vm YB9D03     | 203 | 253 | 3,267 | 94.15 | 92.81 | 97.88 | 94.25 |

<sup>a</sup>Unique genes in strain 1

<sup>b</sup>Unique genes in strain 2

<sup>c</sup>Percentage of genes shared by strain 1

<sup>d</sup>Percentage of genes shared by strain 2

**Table S3**Integron regions extracted from *V. metoecus* and *V. cholerae* genomes.

| Species            | Strain      | Size (bp) | GC (%) | Total ORFs | Hypothetical ORFs (%) |
|--------------------|-------------|-----------|--------|------------|-----------------------|
| <i>V. metoecus</i> | 06-2478     | 91,284    | 41.1   | 115        | 52.2                  |
| <i>V. metoecus</i> | 07-2435     | 101,971   | 41.9   | 147        | 57.8                  |
| <i>V. metoecus</i> | 08-2459     | 140,984   | 41.3   | 208        | 65.9                  |
| <i>V. metoecus</i> | 2010V-1005  | 121,408   | 41.7   | 156        | 62.2                  |
| <i>V. metoecus</i> | OP3H        | 117,537   | 41.4   | 156        | 64.1                  |
| <i>V. metoecus</i> | RC341       | 71,256    | 42.0   | 85         | 56.5                  |
| <i>V. metoecus</i> | YB4D01      | 128,849   | 40.7   | 179        | 69.3                  |
| <i>V. metoecus</i> | YB5B04      | 86,814    | 41.5   | 121        | 71.9                  |
| <i>V. metoecus</i> | YB5B06      | 111,519   | 41.0   | 147        | 72.1                  |
| <i>V. metoecus</i> | YB9D03      | 117,178   | 41.3   | 188        | 69.7                  |
| <i>V. cholerae</i> | MZO-3       | 132,885   | 42.5   | 214        | 48.1                  |
| <i>V. cholerae</i> | N16961      | 125,669   | 42.2   | 187        | 75.4                  |
| <i>V. cholerae</i> | O395        | 116,524   | 41.4   | 199        | 80.4                  |
| <i>V. cholerae</i> | RC385       | 125,710   | 42.0   | 219        | 42.9                  |
| <i>V. cholerae</i> | TM 11079-80 | 62,779    | 42.9   | 106        | 38.7                  |
| <i>V. cholerae</i> | VL426       | 56,384    | 42.0   | 57         | 47.4                  |
| <i>V. cholerae</i> | YB1A01      | 90,204    | 41.4   | 109        | 64.2                  |
| <i>V. cholerae</i> | YB1G06      | 71,516    | 42.0   | 90         | 50.0                  |
| <i>V. cholerae</i> | YB2A06      | 116,704   | 41.6   | 164        | 64.0                  |
| <i>V. cholerae</i> | YB4B03      | 95,111    | 41.7   | 119        | 56.3                  |
| <i>V. cholerae</i> | YB4C07      | 67,955    | 42.4   | 97         | 48.5                  |

# Orata et al. Genetic Interactions Between *V. metoecus* and *V. cholerae*

**Table S4**

Gene function prediction and HGT inference for the *V. metoecus*-*V. cholerae* 1,947 core genes. Locus tags are based from the *V. cholerae* N16961 genome annotation. Functional roles for genes were predicted based on the COG database. Some genes have multiple COG hits (indicated by \* on locus tag). Duplication was called if at least one of the strains has more than one copy of a gene in an orthologous gene family. HGT was inferred if all members of *V. metoecus* and *V. cholerae* could not be split into distinct clades in a phylogenetic tree.

| Family Name* | Locus Tag | Duplication?   | HGT? | COG Number | Description                                                                | Class | Class Description                                             |
|--------------|-----------|----------------|------|------------|----------------------------------------------------------------------------|-------|---------------------------------------------------------------|
| fam4_fq      | VC_0004   | No duplication | No   | COG0706    | Preprotein translocase subunit YidC                                        | U     | Intracellular trafficking, secretion, and vesicular transport |
| fam4_fp      | VC_0013   | No duplication | HGT  | COG0592    | DNA polymerase sliding clamp subunit (PCNA homolog)                        | L     | Replication, recombination and repair                         |
| fam4_fo      | VC_0014   | No duplication | HGT  | COG1195    | Recombinational DNA repair ATPase (RecF pathway)                           | L     | Replication, recombination and repair                         |
| fam4_fn      | VC_0015   | No duplication | No   | COG0187    | Type IIA topoisomerase (DNA gyrase/topo II, topoisomerase IV), B subunit   | L     | Replication, recombination and repair                         |
| fam4_fm      | VC_0016   | No duplication | No   | No hit     |                                                                            |       |                                                               |
| fam4_fl      | VC_0018   | No duplication | HGT  | COG0071    | Molecular chaperone (small heat shock protein)                             | O     | Posttranslational modification, protein turnover, chaperones  |
| fam1_jn      | VC_0019   | Duplication    | HGT  | COG3977    | Alanine-alpha-ketoisovalerate (or valine-pyruvate) aminotransferase        | E     | Amino acid transport and metabolism                           |
| fam4_fk      | VC_0020   | No duplication | No   | COG0751    | Glycyl-tRNA synthetase, beta subunit                                       | J     | Translation, ribosomal structure and biogenesis               |
| fam4_fj      | VC_0021   | No duplication | HGT  | COG0752    | Glycyl-tRNA synthetase, alpha subunit                                      | J     | Translation, ribosomal structure and biogenesis               |
| fam4_fi      | VC_0022   | No duplication | HGT  | COG2119    | Predicted membrane protein                                                 | S     | Function unknown                                              |
| fam4_fh      | VC_0023   | No duplication | HGT  | No hit     |                                                                            |       |                                                               |
| fam4_ff      | VC_0024   | No duplication | No   | COG0425    | Predicted redox protein, regulator of disulfide bond formation             | O     | Posttranslational modification, protein turnover, chaperones  |
| fam4_fe      | VC_0025   | No duplication | No   | No hit     |                                                                            |       |                                                               |
| fam4_fd      | VC_0026   | No duplication | No   | COG0604    | NADPH:quinone reductase and related Zn-dependent oxidoreductases           | CR    | Multiple classes                                              |
| fam4_fc      | VC_0027   | No duplication | No   | COG1171    | Threonine dehydratase                                                      | E     | Amino acid transport and metabolism                           |
| fam4_fb      | VC_0028   | No duplication | No   | COG0129    | Dihydroxyacid dehydratase/phosphogluconate dehydratase                     | EG    | Multiple classes                                              |
| fam4_fa      | VC_0029   | No duplication | HGT  | COG0115    | Branched-chain amino acid aminotransferase/4-amino-4-deoxychorismate lyase | EH    | Multiple classes                                              |
| fam4_ez      | VC_0030   | No duplication | HGT  | COG3978    | Acetolactate synthase (isozyme II), small (regulatory) subunit             | S     | Function unknown                                              |
| fam4_ey      | VC_0031   | No duplication | HGT  | COG0028    | Thiamine pyrophosphate-requiring enzymes                                   | EH    | Multiple classes                                              |
| fam4_ex      | VC_0032   | No duplication | No   | COG0606    | Predicted ATPase with chaperone activity                                   | O     | Posttranslational modification, protein turnover, chaperones  |
| fam1_pi      | VC_0034   | Duplication    | No   | COG1651    | Protein-disulfide isomerase                                                | O     | Posttranslational modification, protein turnover, chaperones  |
| fam4_ew      | VC_0035   | No duplication | No   | COG2334    | Putative homoserine kinase type II (protein kinase fold)                   | R     | General function prediction only                              |
| fam4_ev      | VC_0037   | No duplication | No   | COG3084    | Uncharacterized protein conserved in bacteria                              | S     | Function unknown                                              |
| fam4_eu      | VC_0039   | No duplication | No   | COG4326    | Sporulation control protein                                                | R     | General function prediction only                              |
| fam4_et      | VC_0040   | No duplication | No   | COG1272    | Predicted membrane protein, hemolysin III homolog                          | R     | General function prediction only                              |
| fam4_es      | VC_0041   | No duplication | No   | No hit     |                                                                            |       |                                                               |
| fam1_ie      | VC_0042   | Duplication    | No   | COG0168    | Trk-type K <sup>+</sup> transport systems, membrane components             | P     | Inorganic ion transport and metabolism                        |
| fam4_er      | VC_0043   | No duplication | No   | COG0569    | K <sup>+</sup> transport systems, NAD-binding component                    | P     | Inorganic ion transport and metabolism                        |
| fam4_eq      | VC_0044   | No duplication | No   | COG0144    | tRNA and rRNA cytosine-C5-methylases                                       | J     | Translation, ribosomal structure and biogenesis               |
| fam4_ep      | VC_0045   | No duplication | No   | COG0223    | Methionyl-tRNA formyltransferase                                           | J     | Translation, ribosomal structure and biogenesis               |
| fam4_eo      | VC_0046   | No duplication | No   | COG0242    | N-formylmethionyl-tRNA deformylase                                         | J     | Translation, ribosomal structure and biogenesis               |
| fam4_en      | VC_0047   | No duplication | No   | COG1652    | Uncharacterized protein containing LysM domain                             | S     | Function unknown                                              |
| fam4_em      | VC_0048   | No duplication | No   | COG0758    | Predicted Rossmann fold nucleotide-binding protein involved in DNA uptake  | LU    | Multiple classes                                              |
| fam4_el      | VC_0049   | No duplication | No   | COG2922    | Uncharacterized protein conserved in bacteria                              | S     | Function unknown                                              |
| fam4_ek      | VC_0054   | No duplication | No   | COG0009    | Putative translation factor (SUA5)                                         | J     | Translation, ribosomal structure and biogenesis               |
| fam4_ej      | VC_0055   | No duplication | HGT  | COG0408    | Coproporphyrinogen III oxidase                                             | H     | Coenzyme transport and metabolism                             |
| fam4_ei      | VC_0056   | No duplication | No   | COG0169    | Shikimate 5-dehydrogenase                                                  | E     | Amino acid transport and metabolism                           |
| fam4_eh      | VC_0057   | No duplication | No   | No hit     |                                                                            |       |                                                               |
| fam4_eg      | VC_0058   | No duplication | No   | COG0663    | Carbonic anhydrases/acetyltransferases, isoleucine patch superfamily       | R     | General function prediction only                              |
| fam3_iq      | VC_0061   | No duplication | No   | COG0422    | Thiamine biosynthesis protein ThiC                                         | H     | Coenzyme transport and metabolism                             |
| fam3_fg      | VC_0083   | No duplication | HGT  | COG2226    | Methylase involved in ubiquinone/menaquinone biosynthesis                  | H     | Coenzyme transport and metabolism                             |
| fam3_ex      | VC_0087   | No duplication | No   | COG1826    | Sec-independent protein secretion pathway components                       | U     | Intracellular trafficking, secretion, and vesicular transport |
| fam1_gy      | VC_0111   | Duplication    | No   | COG0218    | Predicted GTPase                                                           | R     | General function prediction only                              |
| fam3_ce      | VC_0113   | No duplication | No   | COG2227    | 2-polyprenyl-3-methyl-5-hydroxy-6-methoxy-1,4-benzoquinol methylase        | H     | Coenzyme transport and metabolism                             |
| fam3_ca      | VC_0114   | No duplication | No   | COG3078    | Uncharacterized protein conserved in bacteria                              | S     | Function unknown                                              |
| fam3_bs      | VC_0115   | No duplication | No   | No hit     |                                                                            |       |                                                               |
| fam3_bn      | VC_0116   | No duplication | No   | COG0635    | Coproporphyrinogen III oxidase and related Fe-S oxidoreductases            | H     | Coenzyme transport and metabolism                             |
| fam3_bl      | VC_0117   | No duplication | No   | COG3071    | Uncharacterized enzyme of heme biosynthesis                                | H     | Coenzyme transport and metabolism                             |
| fam3_bj      | VC_0118   | No duplication | No   | COG2959    | Uncharacterized enzyme of heme biosynthesis                                | H     | Coenzyme transport and metabolism                             |
| fam3_bc      | VC_0119   | No duplication | No   | COG1587    | Uroporphyrinogen-III synthase                                              | H     | Coenzyme transport and metabolism                             |
| fam3_at      | VC_0120   | No duplication | No   | COG0181    | Porphobilinogen deaminase                                                  | H     | Coenzyme transport and metabolism                             |
| fam2_sy      | VC_0125   | No duplication | No   | COG0019    | Diaminopimelate decarboxylase                                              | E     | Amino acid transport and metabolism                           |
| fam2_so      | VC_0126   | No duplication | No   | COG0253    | Diaminopimelate epimerase                                                  | E     | Amino acid transport and metabolism                           |
| fam2_sa      | VC_0128   | No duplication | No   | COG4973    | Site-specific recombinase XerC                                             | L     | Replication, recombination and repair                         |
| fam2_rs      | VC_0129   | No duplication | No   | COG1011    | Predicted hydrolase (HAD superfamily)                                      | R     | General function prediction only                              |
| fam1_mg      | VC_0130*  | Duplication    | No   | COG3287    | Uncharacterized conserved protein                                          | S     | Function unknown                                              |
| fam1_mg      | VC_0130*  | Duplication    | No   | COG2200    | FOG: EAL domain                                                            | T     | Signal transduction mechanisms                                |
| fam1_mg      | VC_0130*  | Duplication    | No   | COG2199    | FOG: GGDEF domain                                                          | T     | Signal transduction mechanisms                                |
| fam2_rb      | VC_0132   | No duplication | No   | COG3650    | Predicted membrane protein                                                 | S     | Function unknown                                              |
| fam2_qr      | VC_0134   | No duplication | No   | COG0561    | Predicted hydrolases of the HAD superfamily                                | R     | General function prediction only                              |
| fam2_qk      | VC_0135   | No duplication | No   | COG2267    | Lysophospholipase                                                          | I     | Lipid transport and metabolism                                |
| fam2_qd      | VC_0136   | No duplication | No   | COG1280    | Putative threonine efflux protein                                          | E     | Amino acid transport and metabolism                           |

Orata et al. Genetic Interactions Between *V. metoecus* and *V. cholerae*

|         |          |                |     |         |                                                                                                                   |     |                                                               |
|---------|----------|----------------|-----|---------|-------------------------------------------------------------------------------------------------------------------|-----|---------------------------------------------------------------|
| fam2_pt | VC_0137  | No duplication | No  | COG3434 | Predicted signal transduction protein containing EAL and modified HD-GYP domains                                  | T   | Signal transduction mechanisms                                |
| fam2_pm | VC_0139  | No duplication | No  | COG0783 | DNA-binding ferritin-like protein (oxidative damage protectant)                                                   | P   | Inorganic ion transport and metabolism                        |
| fam2_pe | VC_0142  | No duplication | No  | No hit  |                                                                                                                   |     |                                                               |
| fam2_of | VC_0144  | No duplication | No  | COG3714 | Predicted membrane protein                                                                                        | S   | Function unknown                                              |
| fam2_nh | VC_0147  | No duplication | No  | COG0552 | Signal recognition particle GTPase                                                                                | U   | Intracellular trafficking, secretion, and vesicular transport |
| fam2_mv | VC_0148  | No duplication | No  | COG2884 | Predicted ATPase involved in cell division                                                                        | D   | Cell cycle control, cell division, chromosome partitioning    |
| fam4_np | VC_0161  | No duplication | No  | COG0583 | Transcriptional regulator                                                                                         | K   | Transcription                                                 |
| fam4_no | VC_0162  | No duplication | No  | COG0059 | Ketol-acid reductoisomerase                                                                                       | EH  | Multiple classes                                              |
| fam4_nn | VC_0163  | No duplication | HGT | COG2960 | Uncharacterized protein conserved in bacteria                                                                     | S   | Function unknown                                              |
| fam1_ai | VC_0164  | Duplication    | HGT | COG0841 | Cation/multidrug efflux pump                                                                                      | V   | Defense mechanisms                                            |
| fam4_nm | VC_0165  | No duplication | No  | COG0845 | Membrane-fusion protein                                                                                           | M   | Cell wall/membrane/envelope biogenesis                        |
| fam4_nl | VC_0170  | No duplication | No  | COG1123 | ATPase components of various ABC-type transport systems, contain duplicated ATPase                                | R   | General function prediction only                              |
| fam1_qb | VC_0171  | Duplication    | No  | COG0747 | ABC-type dipeptide transport system, periplasmic component                                                        | E   | Amino acid transport and metabolism                           |
| fam4_nk | VC_0172  | No duplication | No  | COG0601 | ABC-type dipeptide/oligopeptide/nickel transport systems, permease components                                     | EP  | Multiple classes                                              |
| fam4_nj | VC_0173  | No duplication | No  | COG1173 | ABC-type dipeptide/oligopeptide/nickel transport systems, permease components                                     | EP  | Multiple classes                                              |
| fam4_ni | VC_0174  | No duplication | HGT | No hit  |                                                                                                                   |     |                                                               |
| fam4_nh | VC_0186  | No duplication | No  | COG1249 | Pyruvate/2-oxoglutarate dehydrogenase complex, dihydrolipoamide dehydrogenase (E3) component, and related enzymes | C   | Energy production and conversion                              |
| fam4_ng | VC_0187  | No duplication | No  | COG2961 | Protein involved in catabolism of external DNA                                                                    | R   | General function prediction only                              |
| fam4_nf | VC_0188  | No duplication | No  | COG0339 | Zn-dependent oligopeptidases                                                                                      | E   | Amino acid transport and metabolism                           |
| fam4_ne | VC_0190  | No duplication | HGT | COG0210 | Superfamily I DNA and RNA helicases                                                                               | L   | Replication, recombination and repair                         |
| fam4_nd | VC_0191  | No duplication | HGT | COG1280 | Putative threonine efflux protein                                                                                 | E   | Amino acid transport and metabolism                           |
| fam4_nc | VC_0192  | No duplication | HGT | COG4977 | Transcriptional regulator containing an amidase domain and an AraC-type DNA-binding HTH domain                    | K   | Transcription                                                 |
| fam4_nb | VC_0195  | No duplication | HGT | COG2962 | Predicted permeases                                                                                               | R   | General function prediction only                              |
| fam4_na | VC_0196  | No duplication | HGT | COG0514 | Superfamily II DNA helicase                                                                                       | L   | Replication, recombination and repair                         |
| fam4_mz | VC_0197  | No duplication | HGT | No hit  |                                                                                                                   |     |                                                               |
| fam1_ax | VC_0199  | Duplication    | HGT | COG1132 | ABC-type multidrug transport system, ATPase and permease components                                               | V   | Defense mechanisms                                            |
| fam4_mo | VC_0204  | No duplication | HGT | COG1737 | Transcriptional regulators                                                                                        | K   | Transcription                                                 |
| fam4_mb | VC_0207* | No duplication | HGT | COG1263 | Phosphotransferase system IIC components, glucose/maltose/N-acetylglucosamine-specific                            | G   | Carbohydrate transport and metabolism                         |
| fam4_mb | VC_0207* | No duplication | HGT | COG1264 | Phosphotransferase system IIB components                                                                          | G   | Carbohydrate transport and metabolism                         |
| fam4_lw | VC_0208  | No duplication | No  | COG2862 | Predicted membrane protein                                                                                        | S   | Function unknown                                              |
| fam4_lg | VC_0209  | No duplication | No  | COG1561 | Uncharacterized stress-induced protein                                                                            | S   | Function unknown                                              |
| fam4_ky | VC_0211  | No duplication | HGT | COG0461 | Orotate phosphoribosyltransferase                                                                                 | F   | Nucleotide transport and metabolism                           |
| fam4_kp | VC_0212  | No duplication | HGT | COG1560 | Lauroyl/myristoyl acyltransferase                                                                                 | M   | Cell wall/membrane/envelope biogenesis                        |
| fam4_kh | VC_0213  | No duplication | HGT | COG1560 | Lauroyl/myristoyl acyltransferase                                                                                 | M   | Cell wall/membrane/envelope biogenesis                        |
| fam1_dw | VC_0214  | Duplication    | HGT | COG1309 | Transcriptional regulator                                                                                         | K   | Transcription                                                 |
| fam4_jx | VC_0215  | No duplication | HGT | COG0452 | Phosphopantothencysteine synthetase/decarboxylase                                                                 | H   | Coenzyme transport and metabolism                             |
| fam4_iv | VC_0219  | No duplication | No  | COG0267 | Ribosomal protein L33                                                                                             | J   | Translation, ribosomal structure and biogenesis               |
| fam4_is | VC_0220  | No duplication | No  | No hit  |                                                                                                                   |     |                                                               |
| fam4_ik | VC_0221  | No duplication | No  | COG0266 | Formamidopyrimidine-DNA glycosylase                                                                               | L   | Replication, recombination and repair                         |
| fam4_hs | VC_0224  | No duplication | HGT | COG0463 | Glycosyltransferases involved in cell wall biogenesis                                                             | M   | Cell wall/membrane/envelope biogenesis                        |
| fam1_pp | VC_0225  | Duplication    | HGT | COG0859 | ADP-heptose:LPS heptosyltransferase                                                                               | M   | Cell wall/membrane/envelope biogenesis                        |
| fam4_fr | VC_0233  | No duplication | HGT | COG1519 | 3-deoxy-D-manno-octulosonic-acid transferase                                                                      | M   | Cell wall/membrane/envelope biogenesis                        |
| fam4_fg | VC_0236  | No duplication | HGT | COG0859 | ADP-heptose:LPS heptosyltransferase                                                                               | M   | Cell wall/membrane/envelope biogenesis                        |
| fam4_dt | VC_0240  | No duplication | HGT | COG0451 | Nucleoside-diphosphate-sugar epimerases                                                                           | MG  | Multiple classes                                              |
| fam1_ia | VC_0264  | Duplication    | HGT | COG1236 | Predicted exonuclease of the beta-lactamase fold involved in RNA processing                                       | J   | Translation, ribosomal structure and biogenesis               |
| fam3_st | VC_0265  | No duplication | HGT | COG0668 | Small-conductance mechanosensitive channel                                                                        | M   | Cell wall/membrane/envelope biogenesis                        |
| fam3_sg | VC_0267  | No duplication | HGT | COG0111 | Phosphoglycerate dehydrogenase and related dehydrogenases                                                         | HE  | Multiple classes                                              |
| fam1_os | VC_0268  | Duplication    | HGT | COG3068 | Uncharacterized protein conserved in bacteria                                                                     | S   | Function unknown                                              |
| fam3_ri | VC_0271  | No duplication | No  | COG1253 | Hemolysins and related proteins containing CBS domains                                                            | R   | General function prediction only                              |
| fam3_gy | VC_0273  | No duplication | No  | COG0776 | Bacterial nucleoid DNA-binding protein                                                                            | L   | Replication, recombination and repair                         |
| fam3_qn | VC_0274  | No duplication | No  | No hit  |                                                                                                                   |     |                                                               |
| fam3_qh | VC_0275  | No duplication | HGT | COG0151 | Phosphoribosylamine-glycine ligase                                                                                | F   | Nucleotide transport and metabolism                           |
| fam3_pz | VC_0276  | No duplication | HGT | COG0138 | AICAR transformylase/IMP cyclohydrolase PurH (only IMP cyclohydrolase domain in AfuI)                             | F   | Nucleotide transport and metabolism                           |
| fam3_pj | VC_0277  | No duplication | HGT | COG0789 | Predicted transcriptional regulators                                                                              | K   | Transcription                                                 |
| fam3_pd | VC_0278  | No duplication | HGT | COG3710 | DNA-binding winged-HTH domains                                                                                    | K   | Transcription                                                 |
| fam3_ox | VC_0280  | No duplication | HGT | COG0531 | Amino acid transporters                                                                                           | E   | Amino acid transport and metabolism                           |
| fam3_os | VC_0281  | No duplication | HGT | COG1982 | Arginine/lysine/ornithine decarboxylases                                                                          | E   | Amino acid transport and metabolism                           |
| fam1_oe | VC_0282  | Duplication    | No  | COG0840 | Methyl-accepting chemotaxis protein                                                                               | NT  | Multiple classes                                              |
| fam3_mg | VC_0293  | No duplication | HGT | COG2264 | Ribosomal protein L11 methylase                                                                                   | J   | Translation, ribosomal structure and biogenesis               |
| fam1_nv | VC_0297  | Duplication    | No  | COG0757 | 3-dehydroquinate dehydratase II                                                                                   | E   | Amino acid transport and metabolism                           |
| fam1_nt | VC_0299  | Duplication    | No  | COG0847 | DNA polymerase III, epsilon subunit and related 3'-5' exonucleases                                                | L   | Replication, recombination and repair                         |
| fam3_ku | VC_0300  | No duplication | No  | COG2905 | Predicted signal-transduction protein containing cAMP-binding and CBS domains                                     | T   | Signal transduction mechanisms                                |
| fam3_kj | VC_0302  | No duplication | No  | COG2814 | Arabinose efflux permease                                                                                         | G   | Carbohydrate transport and metabolism                         |
| fam1_hm | VC_0303* | Duplication    | No  | COG0591 | Na <sup>+</sup> /proline symporter                                                                                | ER  | Multiple classes                                              |
| fam1_hm | VC_0303* | Duplication    | No  | COG0642 | Signal transduction histidine kinase                                                                              | T   | Signal transduction mechanisms                                |
| fam1_hm | VC_0303* | Duplication    | No  | COG0784 | FOG: CheY-like receiver                                                                                           | T   | Signal transduction mechanisms                                |
| fam3_js | VC_0304  | No duplication | No  | COG0248 | Exopolyphosphatase                                                                                                | FP  | Multiple classes                                              |
| fam1_hl | VC_0305  | Duplication    | No  | COG0513 | Superfamily II DNA and RNA helicases                                                                              | LKJ | Multiple classes                                              |



Orata et al. Genetic Interactions Between *V. metoecus* and *V. cholerae*

|         |          |                |     |         |                                                                                          |    |                                                               |
|---------|----------|----------------|-----|---------|------------------------------------------------------------------------------------------|----|---------------------------------------------------------------|
| fam3_jh | VC_0306  | No duplication | No  | COG3118 | Thioredoxin domain-containing protein                                                    | O  | Posttranslational modification, protein turnover, chaperones  |
| fam3_jg | VC_0307  | No duplication | No  | COG1158 | Transcription termination factor                                                         | K  | Transcription                                                 |
| fam3_jd | VC_0308  | No duplication | No  | No hit  |                                                                                          |    |                                                               |
| fam1_np | VC_0309  | Duplication    | No  | COG0043 | 3-polyprenyl-4-hydroxybenzoate decarboxylase and related decarboxylases                  | H  | Coenzyme transport and metabolism                             |
| fam1_qz | VC_0318  | Duplication    | No  | COG0812 | UDP-N-acetylmuramate dehydrogenase                                                       | M  | Cell wall/membrane/envelope biogenesis                        |
| fam1_qw | VC_0328  | Duplication    | No  | COG0085 | DNA-directed RNA polymerase, beta subunit/140 kD subunit                                 | K  | Transcription                                                 |
| fam1_qv | VC_0329  | Duplication    | No  | COG0086 | DNA-directed RNA polymerase, beta' subunit/160 kD subunit                                | K  | Transcription                                                 |
| fam5_bj | VC_0330  | No duplication | No  | COG3160 | Regulator of sigma D                                                                     | K  | Transcription                                                 |
| fam5_bi | VC_0331  | No duplication | No  | COG2816 | NTP pyrophosphohydrolases containing a Zn-finger, probably nucleic-acid-binding          | L  | Replication, recombination and repair                         |
| fam1_jc | VC_0332  | Duplication    | No  | COG0407 | Uroporphyrinogen-III decarboxylase                                                       | H  | Coenzyme transport and metabolism                             |
| fam5_bh | VC_0333  | No duplication | No  | COG1309 | Transcriptional regulator                                                                | K  | Transcription                                                 |
| fam1_qu | VC_0334  | Duplication    | No  | No hit  |                                                                                          |    |                                                               |
| fam5_bg | VC_0335  | No duplication | No  | COG4942 | Membrane-bound metallopeptidase                                                          | D  | Cell cycle control, cell division, chromosome partitioning    |
| fam5_bf | VC_0336  | No duplication | No  | COG0696 | Phosphoglyceromutase                                                                     | G  | Carbohydrate transport and metabolism                         |
| fam1_at | VC_0338  | Duplication    | HGT | COG0471 | Di- and tricarboxylate transporters                                                      | P  | Inorganic ion transport and metabolism                        |
| fam5_at | VC_0339  | No duplication | HGT | COG0688 | Phosphatidylserine decarboxylase                                                         | I  | Lipid transport and metabolism                                |
| fam1_qn | VC_0344* | Duplication    | No  | COG0860 | N-acetylmuramoyl-L-alanine amidase                                                       | M  | Cell wall/membrane/envelope biogenesis                        |
| fam1_qn | VC_0344* | Duplication    | No  | COG1388 | FOG: LysM repeat                                                                         | M  | Cell wall/membrane/envelope biogenesis                        |
| fam1_qk | VC_0348  | Duplication    | No  | COG2262 | GTPases                                                                                  | R  | General function prediction only                              |
| fam4_rl | VC_0349  | No duplication | No  | COG0330 | Membrane protease subunits, stomatin/prohibitin homologs                                 | O  | Posttranslational modification, protein turnover, chaperones  |
| fam4_rj | VC_0351  | No duplication | No  | COG3242 | Uncharacterized protein conserved in bacteria                                            | S  | Function unknown                                              |
| fam4_rd | VC_0352  | No duplication | No  | COG2900 | Uncharacterized protein conserved in bacteria                                            | S  | Function unknown                                              |
| fam4_qu | VC_0353  | No duplication | No  | COG2319 | FOG: WD40 repeat                                                                         | R  | General function prediction only                              |
| fam1_av | VC_0361  | Duplication    | HGT | COG0480 | Translation elongation factors (GTPases)                                                 | J  | Translation, ribosomal structure and biogenesis               |
| fam2_ix | VC_0371  | No duplication | No  | COG0305 | Replicative DNA helicase                                                                 | L  | Replication, recombination and repair                         |
| fam2_ku | VC_0372  | No duplication | No  | COG0787 | Alanine racemase                                                                         | M  | Cell wall/membrane/envelope biogenesis                        |
| fam4_bw | VC_0374  | No duplication | No  | COG0166 | Glucose-6-phosphate isomerase                                                            | G  | Carbohydrate transport and metabolism                         |
| fam5_ql | VC_0376  | No duplication | No  | COG2220 | Predicted Zn-dependent hydrolases of the beta-lactamase fold                             | R  | General function prediction only                              |
| fam4_gi | VC_0377  | No duplication | No  | COG1406 | Predicted inhibitor of MCP methylation, homolog of CheC                                  | N  | Cell motility                                                 |
| fam4_ko | VC_0379  | No duplication | No  | COG0042 | tRNA-dihydrouridine synthase                                                             | J  | Translation, ribosomal structure and biogenesis               |
| fam1_ip | VC_0381  | Duplication    | No  | No hit  |                                                                                          |    |                                                               |
| fam4_ns | VC_0383  | No duplication | HGT | No hit  |                                                                                          |    |                                                               |
| fam1_iq | VC_0384  | Duplication    | No  | COG0369 | Sulfite reductase, alpha subunit (flavoprotein)                                          | P  | Inorganic ion transport and metabolism                        |
| fam4_oc | VC_0385  | No duplication | HGT | COG0155 | Sulfite reductase, beta subunit (hemoprotein)                                            | P  | Inorganic ion transport and metabolism                        |
| fam4_gh | VC_0389  | No duplication | No  | COG0025 | NhaP-type Na <sup>+</sup> /H <sup>+</sup> and K <sup>+</sup> /H <sup>+</sup> antiporters | P  | Inorganic ion transport and metabolism                        |
| fam1_pn | VC_0390* | Duplication    | No  | COG1410 | Methionine synthase I, cobalamin-binding domain                                          | E  | Amino acid transport and metabolism                           |
| fam1_pn | VC_0390* | Duplication    | No  | COG0646 | Methionine synthase I (cobalamin-dependent), methyltransferase domain                    | E  | Amino acid transport and metabolism                           |
| fam4_gj | VC_0391  | No duplication | HGT | COG0527 | Aspartokinases                                                                           | E  | Amino acid transport and metabolism                           |
| fam1_if | VC_0392  | Duplication    | No  | COG0075 | Serine-pyruvate aminotransferase/archaeal aspartate aminotransferase                     | E  | Amino acid transport and metabolism                           |
| fam4_gk | VC_0393  | No duplication | No  | COG3307 | Lipid A core - O-antigen ligase and related enzymes                                      | M  | Cell wall/membrane/envelope biogenesis                        |
| fam4_gl | VC_0394  | No duplication | No  | COG0178 | Excinuclease ATPase subunit                                                              | L  | Replication, recombination and repair                         |
| fam4_gm | VC_0395  | No duplication | No  | COG1210 | UDP-glucose pyrophosphorylase                                                            | M  | Cell wall/membrane/envelope biogenesis                        |
| fam4_gn | VC_0396  | No duplication | No  | COG2197 | Response regulator containing a CheY-like receiver domain and an HTH DNA-binding domain  | TK | Multiple classes                                              |
| fam4_go | VC_0397  | No duplication | No  | COG0629 | Single-stranded DNA-binding protein                                                      | L  | Replication, recombination and repair                         |
| fam4_gp | VC_0398* | No duplication | No  | COG2200 | FOG: EAL domain                                                                          | T  | Signal transduction mechanisms                                |
| fam4_gp | VC_0398* | No duplication | No  | COG2199 | FOG: GGDEF domain                                                                        | T  | Signal transduction mechanisms                                |
| fam4_gq | VC_0399  | No duplication | No  | COG3166 | Tfp pilus assembly protein PilN                                                          | NU | Multiple classes                                              |
| fam4_gr | VC_0400  | No duplication | No  | COG3167 | Tfp pilus assembly protein PilO                                                          | NU | Multiple classes                                              |
| fam4_gs | VC_0401  | No duplication | No  | No hit  |                                                                                          |    |                                                               |
| fam4_gt | VC_0402  | No duplication | No  | COG1450 | Type II secretory pathway, component PuiD                                                | NU | Multiple classes                                              |
| fam4_gu | VC_0403  | No duplication | No  | COG3267 | Type II secretory pathway, component ExeA (predicted ATPase)                             | U  | Intracellular trafficking, secretion, and vesicular transport |
| fam4_gv | VC_0404  | No duplication | No  | COG5010 | Ftp pilus assembly protein TadD, contains TPR repeats                                    | U  | Intracellular trafficking, secretion, and vesicular transport |
| fam4_gw | VC_0405  | No duplication | No  | COG2804 | Type II secretory pathway, ATPase PuiE/Tfp pilus assembly pathway, ATPase PiiB           | NU | Multiple classes                                              |
| fam1_cp | VC_0406  | Duplication    | No  | COG1459 | Type II secretory pathway, component PuiF                                                | NU | Multiple classes                                              |
| fam4_gx | VC_0408  | No duplication | No  | COG2165 | Type II secretory pathway, pseudopilin PuiG                                              | NU | Multiple classes                                              |
| fam4_gy | VC_0410  | No duplication | No  | COG2165 | Type II secretory pathway, pseudopilin PuiG                                              | NU | Multiple classes                                              |
| fam4_gz | VC_0411  | No duplication | No  | COG2165 | Type II secretory pathway, pseudopilin PuiG                                              | NU | Multiple classes                                              |
| fam4_ha | VC_0412  | No duplication | No  | COG4966 | Tfp pilus assembly protein PiiW                                                          | NU | Multiple classes                                              |
| fam1_cq | VC_0414  | Duplication    | HGT | No hit  |                                                                                          |    |                                                               |
| fam4_hb | VC_0415  | No duplication | No  | COG1077 | Actin-like ATPase involved in cell morphogenesis                                         | D  | Cell cycle control, cell division, chromosome partitioning    |
| fam4_hc | VC_0416  | No duplication | No  | COG1792 | Cell shape-determining protein                                                           | M  | Cell wall/membrane/envelope biogenesis                        |
| fam4_hd | VC_0417  | No duplication | No  | COG2891 | Cell shape-determining protein                                                           | M  | Cell wall/membrane/envelope biogenesis                        |
| fam4_he | VC_0419  | No duplication | No  | COG1530 | Ribonucleases G and E                                                                    | J  | Translation, ribosomal structure and biogenesis               |
| fam1_po | VC_0420  | Duplication    | No  | COG3164 | Predicted membrane protein                                                               | S  | Function unknown                                              |
| fam4_hf | VC_0421  | No duplication | No  | COG0388 | Predicted amidohydrolase                                                                 | R  | General function prediction only                              |
| fam4_hg | VC_0422  | No duplication | No  | COG0312 | Predicted Zn-dependent proteases and their inactivated homologs                          | R  | General function prediction only                              |
| fam4_hh | VC_0423  | No duplication | No  | COG2235 | Arginine deiminase                                                                       | E  | Amino acid transport and metabolism                           |
| fam4_hi | VC_0424  | No duplication | No  | COG3076 | Uncharacterized protein conserved in bacteria                                            | S  | Function unknown                                              |

Orata et al. Genetic Interactions Between *V. metoecus* and *V. cholerae*

|         |          |                |     |         |                                                                                                                        |    |                                                              |
|---------|----------|----------------|-----|---------|------------------------------------------------------------------------------------------------------------------------|----|--------------------------------------------------------------|
| fam4_hj | VC_0425  | No duplication | No  | No hit  |                                                                                                                        |    |                                                              |
| fam4_hk | VC_0426  | No duplication | No  | COG3205 | Predicted membrane protein                                                                                             | S  | Function unknown                                             |
| fam4_hl | VC_0428  | No duplication | No  | COG0589 | Universal stress protein UspA and related nucleotide-binding proteins                                                  | T  | Signal transduction mechanisms                               |
| fam1_ci | VC_0429  | Duplication    | No  | COG4666 | TRAP-type uncharacterized transport system, fused permease components                                                  | R  | General function prediction only                             |
| fam4_hm | VC_0430  | No duplication | No  | COG2358 | TRAP-type uncharacterized transport system, periplasmic component                                                      | R  | General function prediction only                             |
| fam4_hn | VC_0431  | No duplication | No  | COG1438 | Arginine repressor                                                                                                     | K  | Transcription                                                |
| fam4_ho | VC_0432  | No duplication | No  | COG0039 | Malate/lactate dehydrogenases                                                                                          | C  | Energy production and conversion                             |
| fam4_hp | VC_0433  | No duplication | No  | COG0531 | Amino acid transporters                                                                                                | E  | Amino acid transport and metabolism                          |
| fam4_hq | VC_0434  | No duplication | No  | COG0142 | Geranylgeranyl pyrophosphate synthase                                                                                  | H  | Coenzyme transport and metabolism                            |
| fam4_hr | VC_0437  | No duplication | No  | COG0536 | Predicted GTPase                                                                                                       | R  | General function prediction only                             |
| fam4_ht | VC_0451  | No duplication | HGT | COG2924 | Fe-S cluster protector protein                                                                                         | CO | Multiple classes                                             |
| fam1_ig | VC_0452  | Duplication    | HGT | COG1194 | A/G-specific DNA glycosylase                                                                                           | L  | Replication, recombination and repair                        |
| fam4_hu | VC_0453  | No duplication | HGT | COG0220 | Predicted S-adenosylmethionine-dependent methyltransferase                                                             | R  | General function prediction only                             |
| fam1_pq | VC_0454  | Duplication    | No  | COG2066 | Glutaminase                                                                                                            | E  | Amino acid transport and metabolism                          |
| fam4_hv | VC_0455  | No duplication | HGT | COG0635 | Coproporphyrinogen III oxidase and related Fe-S oxidoreductases                                                        | H  | Coenzyme transport and metabolism                            |
| fam4_hw | VC_0456  | No duplication | HGT | COG0127 | Xanthosine triphosphate pyrophosphatase                                                                                | F  | Nucleotide transport and metabolism                          |
| fam4_hx | VC_0457  | No duplication | No  | No hit  |                                                                                                                        |    |                                                              |
| fam4_hy | VC_0458  | No duplication | No  | COG1872 | Uncharacterized conserved protein                                                                                      | S  | Function unknown                                             |
| fam4_hz | VC_0459  | No duplication | No  | COG0762 | Predicted integral membrane protein                                                                                    | S  | Function unknown                                             |
| fam4_ia | VC_0460  | No duplication | HGT | COG0345 | Proline-5-carboxylate reductase                                                                                        | E  | Amino acid transport and metabolism                          |
| fam4_ib | VC_0461  | No duplication | No  | COG0325 | Predicted enzyme with a TIM-barrel fold                                                                                | R  | General function prediction only                             |
| fam4_ic | VC_0462  | No duplication | No  | COG2805 | Ttp pilus assembly protein, pilus retraction ATPase PilT                                                               | NU | Multiple classes                                             |
| fam4_id | VC_0463  | No duplication | No  | COG5008 | Ttp pilus assembly protein, ATPase PilU                                                                                | NU | Multiple classes                                             |
| fam4_ie | VC_0464  | No duplication | HGT | COG2197 | Response regulator containing a CheY-like receiver domain and an HTH DNA-binding domain                                | TK | Multiple classes                                             |
| fam1_du | VC_0465  | Duplication    | HGT | COG0162 | Tyrosyl-tRNA synthetase                                                                                                | J  | Translation, ribosomal structure and biogenesis              |
| fam4_if | VC_0466  | No duplication | HGT | COG0816 | Predicted endonuclease involved in recombination (possible Holliday junction resolvase in Mycoplasmas and B. subtilis) | L  | Replication, recombination and repair                        |
| fam1_pr | VC_0467  | Duplication    | HGT | COG1678 | Putative transcriptional regulator                                                                                     | K  | Transcription                                                |
| fam4_ig | VC_0468  | No duplication | HGT | COG0189 | Glutathione synthase/Ribosomal protein S6 modification enzyme (glutaminyl transferase)                                 | HJ | Multiple classes                                             |
| fam4_ih | VC_0469  | No duplication | HGT | COG1385 | Uncharacterized protein conserved in bacteria                                                                          | S  | Function unknown                                             |
| fam4_ii | VC_0470  | No duplication | HGT | COG2356 | Endonuclease I                                                                                                         | L  | Replication, recombination and repair                        |
| fam4_ij | VC_0471  | No duplication | HGT | COG3091 | Uncharacterized protein conserved in bacteria                                                                          | S  | Function unknown                                             |
| fam4_il | VC_0476  | No duplication | HGT | COG0057 | Glyceraldehyde-3-phosphate dehydrogenase/erythrose-4-phosphate dehydrogenase                                           | G  | Carbohydrate transport and metabolism                        |
| fam1_ps | VC_0477  | Duplication    | No  | COG0126 | 3-phosphoglycerate kinase                                                                                              | G  | Carbohydrate transport and metabolism                        |
| fam4_im | VC_0478  | No duplication | No  | COG0191 | Fructose/tagatose bisphosphate aldolase                                                                                | G  | Carbohydrate transport and metabolism                        |
| fam4_in | VC_0480  | No duplication | No  | COG0668 | Small-conductance mechanosensitive channel                                                                             | M  | Cell wall/membrane/envelope biogenesis                       |
| fam4_io | VC_0481  | No duplication | No  | COG1279 | Lysine efflux permease                                                                                                 | R  | General function prediction only                             |
| fam4_ip | VC_0482  | No duplication | No  | COG0583 | Transcriptional regulator                                                                                              | K  | Transcription                                                |
| fam4_iq | VC_0483  | No duplication | No  | COG2968 | Uncharacterized conserved protein                                                                                      | S  | Function unknown                                             |
| fam4_ir | VC_0484  | No duplication | No  | No hit  |                                                                                                                        |    |                                                              |
| fam4_it | VC_0485  | No duplication | No  | COG0469 | Pyruvate kinase                                                                                                        | G  | Carbohydrate transport and metabolism                        |
| fam1_ih | VC_0486  | Duplication    | No  | COG1349 | Transcriptional regulators of sugar metabolism                                                                         | KG | Multiple classes                                             |
| fam4_iu | VC_0487  | No duplication | No  | COG0449 | Glucosamine 6-phosphate synthetase, contains amidotransferase and phosphosugar isomerase domains                       | M  | Cell wall/membrane/envelope biogenesis                       |
| fam1_as | VC_0488  | Duplication    | HGT | COG4663 | TRAP-type mannitol/chloroaromatic compound transport system, periplasmic component                                     | Q  | Secondary metabolites biosynthesis, transport and catabolism |
| fam1_an | VC_0489  | Duplication    | HGT | COG3176 | Putative hemolysin                                                                                                     | R  | General function prediction only                             |
| fam1_ad | VC_0514  | Duplication    | HGT | COG0840 | Methyl-accepting chemotaxis protein                                                                                    | NT | Multiple classes                                             |
| fam4_iw | VC_0522  | No duplication | No  | COG0596 | Predicted hydrolases or acyltransferases (alpha/beta hydrolase superfamily)                                            | R  | General function prediction only                             |
| fam4_ix | VC_0523  | No duplication | No  | COG0344 | Predicted membrane protein                                                                                             | S  | Function unknown                                             |
| fam4_iy | VC_0524  | Duplication    | No  | COG1539 | Dihydroneopterin aldolase                                                                                              | H  | Coenzyme transport and metabolism                            |
| fam4_iz | VC_0525  | No duplication | No  | COG0801 | 7,8-dihydro-6-hydroxymethylpterin-pyrophosphokinase                                                                    | H  | Coenzyme transport and metabolism                            |
| fam4_ia | VC_0526  | No duplication | No  | COG1968 | Uncharacterized bacitracin resistance protein                                                                          | V  | Defense mechanisms                                           |
| fam4_ib | VC_0528  | No duplication | No  | COG1211 | 4-diphosphocytidyl-2-methyl-D-erythritol synthase                                                                      | I  | Lipid transport and metabolism                               |
| fam4_jc | VC_0529  | No duplication | No  | COG0245 | 2C-methyl-D-erythritol 2,4-cyclodiphosphate synthase                                                                   | I  | Lipid transport and metabolism                               |
| fam4_jd | VC_0530  | No duplication | No  | COG0585 | Uncharacterized conserved protein                                                                                      | S  | Function unknown                                             |
| fam4_je | VC_0531  | No duplication | No  | COG0496 | Predicted acid phosphatase                                                                                             | R  | General function prediction only                             |
| fam4_jf | VC_0532  | No duplication | No  | COG2518 | Protein-L-isoaspartate carboxylmethyltransferase                                                                       | O  | Posttranslational modification, protein turnover, chaperones |
| fam4_jg | VC_0533  | No duplication | No  | COG0739 | Membrane proteins related to metalloendopeptidases                                                                     | M  | Cell wall/membrane/envelope biogenesis                       |
| fam4_jh | VC_0535  | No duplication | No  | COG0249 | Mismatch repair ATPase (MutS family)                                                                                   | L  | Replication, recombination and repair                        |
| fam4_ji | VC_0537  | No duplication | HGT | COG0031 | Cysteine synthase                                                                                                      | E  | Amino acid transport and metabolism                          |
| fam4_jj | VC_0538  | No duplication | HGT | COG4150 | ABC-type sulfate transport system, periplasmic component                                                               | P  | Inorganic ion transport and metabolism                       |
| fam4_jk | VC_0539  | No duplication | HGT | COG0555 | ABC-type sulfate transport system, permease component                                                                  | O  | Posttranslational modification, protein turnover, chaperones |
| fam4_jl | VC_0540  | No duplication | HGT | COG4208 | ABC-type sulfate transport system, permease component                                                                  | P  | Inorganic ion transport and metabolism                       |
| fam4_jm | VC_0541  | No duplication | HGT | COG1118 | ABC-type sulfate/molybdate transport systems, ATPase component                                                         | P  | Inorganic ion transport and metabolism                       |
| fam4_jn | VC_0542  | No duplication | HGT | COG1546 | Uncharacterized protein (competence- and mitomycin-induced)                                                            | R  | General function prediction only                             |
| fam4_jo | VC_0543  | No duplication | HGT | COG0468 | RecA/RadA recombinase                                                                                                  | L  | Replication, recombination and repair                        |
| fam4_jp | VC_0544  | No duplication | HGT | COG2137 | Uncharacterized protein conserved in bacteria                                                                          | R  | General function prediction only                             |
| fam1_ii | VC_0545  | Duplication    | HGT | COG0013 | Alanyl-tRNA synthetase                                                                                                 | J  | Translation, ribosomal structure and biogenesis              |
| fam1_ao | VC_0550* | Duplication    | HGT | COG5016 | Pyruvate/oxaloacetate carboxyltransferase                                                                              | C  | Energy production and conversion                             |
| fam1_ao | VC_0550* | Duplication    | HGT | COG0511 | Biotin carboxyl carrier protein                                                                                        | I  | Lipid transport and metabolism                               |

Orata et al. Genetic Interactions Between *V. metoecus* and *V. cholerae*

|         |          |                |     |         |                                                                                                     |     |                                                              |
|---------|----------|----------------|-----|---------|-----------------------------------------------------------------------------------------------------|-----|--------------------------------------------------------------|
| fam4_jq | VC_0551  | No duplication | No  | COG1883 | Na <sup>+</sup> -transporting methylmalonyl-CoA/oxaloacetate decarboxylase, beta subunit            | C   | Energy production and conversion                             |
| fam4_jr | VC_0552  | No duplication | No  | COG0604 | NADPH:quinone reductase and related Zn-dependent oxidoreductases                                    | CR  | Multiple classes                                             |
| fam4_js | VC_0553  | No duplication | HGT | COG1238 | Predicted membrane protein                                                                          | S   | Function unknown                                             |
| fam1_dv | VC_0554* | Duplication    | No  | COG0612 | Predicted Zn-dependent peptidases                                                                   | R   | General function prediction only                             |
| fam1_dv | VC_0554* | Duplication    | No  | COG1025 | Secreted/periplasmic Zn-dependent peptidases, insulinase-like                                       | O   | Posttranslational modification, protein turnover, chaperones |
| fam4_jt | VC_0556  | No duplication | No  | COG2918 | Gamma-glutamylcysteine synthetase                                                                   | H   | Coenzyme transport and metabolism                            |
| fam4_ju | VC_0557  | No duplication | No  | COG1854 | LuxS protein involved in autoinducer AI2 synthesis                                                  | T   | Signal transduction mechanisms                               |
| fam4_jv | VC_0558  | No duplication | No  | COG4536 | Putative Mg <sup>2+</sup> and Co <sup>2+</sup> transporter CorB                                     | P   | Inorganic ion transport and metabolism                       |
| fam4_jw | VC_0559  | No duplication | No  | COG4137 | ABC-type uncharacterized transport system, permease component                                       | R   | General function prediction only                             |
| fam4_jy | VC_0585  | No duplication | No  | COG0634 | Hypoxanthine-guanine phosphoribosyltransferase                                                      | F   | Nucleotide transport and metabolism                          |
| fam4_jz | VC_0586  | No duplication | No  | COG0288 | Carbonic anhydrase                                                                                  | P   | Inorganic ion transport and metabolism                       |
| fam4_ka | VC_0587  | No duplication | No  | COG0659 | Sulfate permease and related transporters (MFS superfamily)                                         | P   | Inorganic ion transport and metabolism                       |
| fam4_kb | VC_0589  | No duplication | No  | COG1131 | ABC-type multidrug transport system, ATPase component                                               | V   | Defense mechanisms                                           |
| fam4_kc | VC_0590  | No duplication | No  | COG1682 | ABC-type polysaccharide/polyol phosphate export systems, permease component                         | GM  | Multiple classes                                             |
| fam4_kd | VC_0591  | No duplication | HGT | COG0414 | Panthothenate synthetase                                                                            | H   | Coenzyme transport and metabolism                            |
| fam4_ke | VC_0593  | No duplication | No  | COG0801 | 7,8-dihydro-6-hydroxymethylpterin-pyrophosphokinase                                                 | H   | Coenzyme transport and metabolism                            |
| fam4_kf | VC_0597  | No duplication | No  | COG1489 | DNA-binding protein, stimulates sugar fermentation                                                  | R   | General function prediction only                             |
| fam5_sf | VC_0600  | No duplication | No  | No hit  |                                                                                                     |     |                                                              |
| fam1_ik | VC_0601  | Duplication    | No  | COG1643 | HrpA-like helicases                                                                                 | L   | Replication, recombination and repair                        |
| fam4_kg | VC_0602  | No duplication | No  | COG0744 | Membrane carboxypeptidase (penicillin-binding protein)                                              | M   | Cell wall/membrane/envelope biogenesis                       |
| fam1_il | VC_0603* | Duplication    | No  | COG0729 | Outer membrane protein                                                                              | M   | Cell wall/membrane/envelope biogenesis                       |
| fam1_il | VC_0603* | Duplication    | No  | COG4667 | Predicted esterase of the alpha-beta hydrolase superfamily                                          | R   | General function prediction only                             |
| fam1_pv | VC_0604  | Duplication    | No  | COG1049 | Aconitase B                                                                                         | C   | Energy production and conversion                             |
| fam4_kj | VC_0608  | No duplication | No  | COG1840 | ABC-type Fe <sup>3+</sup> transport system, periplasmic component                                   | P   | Inorganic ion transport and metabolism                       |
| fam4_kl | VC_0611  | No duplication | HGT | COG1109 | Phosphomannomutase                                                                                  | G   | Carbohydrate transport and metabolism                        |
| fam1_pw | VC_0612  | Duplication    | HGT | COG3459 | Cellobiose phosphorylase                                                                            | G   | Carbohydrate transport and metabolism                        |
| fam4_km | VC_0613  | No duplication | No  | COG3525 | N-acetyl-beta-hexosaminidase                                                                        | G   | Carbohydrate transport and metabolism                        |
| fam1_aq | VC_0614  | Duplication    | HGT | COG2971 | Predicted N-acetylglucosamine kinase                                                                | G   | Carbohydrate transport and metabolism                        |
| fam1_aq | VC_0615  | Duplication    | HGT | No hit  |                                                                                                     |     |                                                              |
| fam4_kn | VC_0616  | No duplication | No  | COG0444 | ABC-type dipeptide/oligopeptide/nickel transport system, ATPase component                           | EP  | Multiple classes                                             |
| fam4_kq | VC_0617  | No duplication | No  | COG0444 | ABC-type dipeptide/oligopeptide/nickel transport system, ATPase component                           | EP  | Multiple classes                                             |
| fam4_kr | VC_0618  | No duplication | No  | COG1173 | ABC-type dipeptide/oligopeptide/nickel transport systems, permease components                       | EP  | Multiple classes                                             |
| fam4_ks | VC_0619  | No duplication | No  | COG0601 | ABC-type dipeptide/oligopeptide/nickel transport systems, permease components                       | EP  | Multiple classes                                             |
| fam4_ks | VC_0619  | No duplication | No  | COG0601 | ABC-type dipeptide/oligopeptide/nickel transport systems, permease components                       | EP  | Multiple classes                                             |
| fam4_kt | VC_0620  | No duplication | No  | COG0747 | ABC-type dipeptide transport system, periplasmic component                                          | E   | Amino acid transport and metabolism                          |
| fam1_im | VC_0622* | Duplication    | No  | COG0642 | Signal transduction histidine kinase                                                                | T   | Signal transduction mechanisms                               |
| fam1_im | VC_0622* | Duplication    | No  | COG0745 | Response regulators consisting of a CheY-like receiver domain and a winged-helix DNA-binding domain | TK  | Multiple classes                                             |
| fam4_ku | VC_0623  | No duplication | No  | COG2813 | 16S RNA G1207 methylase RsmC                                                                        | J   | Translation, ribosomal structure and biogenesis              |
| fam4_kv | VC_0624  | No duplication | No  | COG0628 | Predicted permease                                                                                  | R   | General function prediction only                             |
| fam4_kw | VC_0626  | No duplication | No  | COG0001 | Glutamate-1-semialdehyde aminotransferase                                                           | H   | Coenzyme transport and metabolism                            |
| fam4_kx | VC_0627  | No duplication | No  | COG0316 | Uncharacterized conserved protein                                                                   | S   | Function unknown                                             |
| fam1_in | VC_0628  | Duplication    | No  | COG0845 | Membrane-fusion protein                                                                             | M   | Cell wall/membrane/envelope biogenesis                       |
| fam4_la | VC_0641  | No duplication | No  | COG0779 | Uncharacterized protein conserved in bacteria                                                       | S   | Function unknown                                             |
| fam4_lb | VC_0642  | No duplication | No  | COG0195 | Transcription elongation factor                                                                     | K   | Transcription                                                |
| fam4_lc | VC_0644  | No duplication | No  | COG0858 | Ribosome-binding factor A                                                                           | J   | Translation, ribosomal structure and biogenesis              |
| fam4_ld | VC_0645  | No duplication | No  | COG0130 | Pseudouridine synthase                                                                              | J   | Translation, ribosomal structure and biogenesis              |
| fam4_le | VC_0646  | No duplication | No  | COG0184 | Ribosomal protein S15P/S13E                                                                         | J   | Translation, ribosomal structure and biogenesis              |
| fam4_lf | VC_0647  | No duplication | No  | COG1185 | Polyribonucleotide nucleotidyltransferase (polynucleotide phosphorylase)                            | J   | Translation, ribosomal structure and biogenesis              |
| fam4_lh | VC_0648  | No duplication | No  | COG4785 | Lipoprotein Nipl, contains TPR repeats                                                              | R   | General function prediction only                             |
| fam4_li | VC_0649  | No duplication | No  | COG1321 | Mn-dependent transcriptional regulator                                                              | K   | Transcription                                                |
| fam1_px | VC_0650  | Duplication    | No  | COG0534 | Na <sup>+</sup> -driven multidrug efflux pump                                                       | V   | Defense mechanisms                                           |
| fam4_lj | VC_0651  | No duplication | No  | COG0826 | Collagenase and related proteases                                                                   | O   | Posttranslational modification, protein turnover, chaperones |
| fam4_lk | VC_0652  | No duplication | No  | COG0826 | Collagenase and related proteases                                                                   | O   | Posttranslational modification, protein turnover, chaperones |
| fam4_ll | VC_0653* | No duplication | No  | COG5001 | Predicted signal transduction protein containing a membrane domain, an EAL and a GGDEF domain       | T   | Signal transduction mechanisms                               |
| fam4_ll | VC_0653* | No duplication | No  | COG2202 | FOG: PAS/PAC domain                                                                                 | T   | Signal transduction mechanisms                               |
| fam4_lm | VC_0655  | No duplication | No  | COG3153 | Predicted acetyltransferase                                                                         | R   | General function prediction only                             |
| fam4_ln | VC_0656  | No duplication | No  | COG3050 | DNA polymerase III, psi subunit                                                                     | L   | Replication, recombination and repair                        |
| fam4_lo | VC_0657  | No duplication | No  | COG0456 | Acetyltransferases                                                                                  | R   | General function prediction only                             |
| fam4_lp | VC_0658  | No duplication | No  | COG5001 | Predicted signal transduction protein containing a membrane domain, an EAL and a GGDEF domain       | T   | Signal transduction mechanisms                               |
| fam4_lq | VC_0659  | No duplication | No  | COG4108 | Peptide chain release factor RF-3                                                                   | J   | Translation, ribosomal structure and biogenesis              |
| fam4_lr | VC_0660  | No duplication | No  | COG0513 | Superfamily II DNA and RNA helicases                                                                | LKJ | Multiple classes                                             |
| fam4_ls | VC_0661  | No duplication | No  | COG4123 | Predicted O-methyltransferase                                                                       | R   | General function prediction only                             |
| fam4_lt | VC_0662  | No duplication | No  | COG1114 | Branched-chain amino acid permeases                                                                 | E   | Amino acid transport and metabolism                          |
| fam4_lu | VC_0664  | No duplication | No  | COG1190 | Lysyl-tRNA synthetase (class II)                                                                    | J   | Translation, ribosomal structure and biogenesis              |
| fam4_lv | VC_0665  | No duplication | No  | COG1221 | Transcriptional regulators containing an AAA-type ATPase domain and a DNA-binding domain            | KT  | Multiple classes                                             |
| fam4_lx | VC_0667  | No duplication | No  | COG0667 | Predicted oxidoreductases (related to aryl-alcohol dehydrogenases)                                  | C   | Energy production and conversion                             |
| fam4_ly | VC_0668  | No duplication | No  | COG3066 | DNA mismatch repair protein                                                                         | L   | Replication, recombination and repair                        |
| fam4_lz | VC_0672  | No duplication | No  | COG3605 | Signal transduction protein containing GAF and PtsI domains                                         | T   | Signal transduction mechanisms                               |
| fam4_ma | VC_0673  | No duplication | No  | COG0730 | Predicted permeases                                                                                 | R   | General function prediction only                             |

Orata et al. Genetic Interactions Between *V. metoecus* and *V. cholerae*

|         |          |                |     |         |                                                                                                           |    |                                                               |
|---------|----------|----------------|-----|---------|-----------------------------------------------------------------------------------------------------------|----|---------------------------------------------------------------|
| fam1_py | VC_0674  | Duplication    | No  | COG0682 | Prolipoprotein diacylglyceryltransferase                                                                  | M  | Cell wall/membrane/envelope biogenesis                        |
| fam4_mc | VC_0675  | No duplication | No  | COG0207 | Thymidylate synthase                                                                                      | F  | Nucleotide transport and metabolism                           |
| fam4_md | VC_0676  | No duplication | No  | COG1283 | Na <sup>+</sup> /phosphate symporter                                                                      | P  | Inorganic ion transport and metabolism                        |
| fam4_mf | VC_0681  | No duplication | No  | COG0196 | FAD synthase                                                                                              | H  | Coenzyme transport and metabolism                             |
| fam4_mg | VC_0682  | No duplication | No  | COG0060 | Isoleucyl-tRNA synthetase                                                                                 | J  | Translation, ribosomal structure and biogenesis               |
| fam4_mh | VC_0683  | No duplication | HGT | COG0597 | Lipoprotein signal peptidase                                                                              | MU | Multiple classes                                              |
| fam4_mi | VC_0687  | No duplication | HGT | COG1966 | Carbon starvation protein, predicted membrane protein                                                     | T  | Signal transduction mechanisms                                |
| fam4_mj | VC_0688  | No duplication | No  | No hit  |                                                                                                           |    |                                                               |
| fam4_mk | VC_0690  | No duplication | HGT | COG2103 | Predicted sugar phosphate isomerase                                                                       | R  | General function prediction only                              |
| fam4_ml | VC_0691  | No duplication | HGT | COG2377 | Predicted molecular chaperone distantly related to HSP70-fold metalloproteases                            | O  | Posttranslational modification, protein turnover, chaperones  |
| fam4_mm | VC_0692  | No duplication | HGT | COG1472 | Beta-glucosidase-related glycosidases                                                                     | G  | Carbohydrate transport and metabolism                         |
| fam4_mn | VC_0694  | No duplication | HGT | COG3275 | Putative regulator of cell autolysis                                                                      | T  | Signal transduction mechanisms                                |
| fam4_mp | VC_0695  | No duplication | HGT | COG0722 | 3-deoxy-D-arabino-heptulosonate 7-phosphate (DAH7P) synthase                                              | E  | Amino acid transport and metabolism                           |
| fam4_mq | VC_0696* | No duplication | HGT | COG0287 | Prephenate dehydrogenase                                                                                  | E  | Amino acid transport and metabolism                           |
| fam4_mr | VC_0697  | No duplication | HGT | COG1605 | Chorismate mutase                                                                                         | E  | Amino acid transport and metabolism                           |
| fam1_io | VC_0698  | Duplication    | HGT | COG0488 | ATPase components of ABC transporters with duplicated ATPase domains                                      | R  | General function prediction only                              |
| fam1_dx | VC_0700  | Duplication    | No  | COG0741 | Soluble lytic murein transglycosylase and related regulatory proteins (some contain LysM/invasin domains) | M  | Cell wall/membrane/envelope biogenesis                        |
| fam4_ms | VC_0701  | No duplication | No  | COG2973 | Trp operon repressor                                                                                      | K  | Transcription                                                 |
| fam4_mt | VC_0703* | No duplication | No  | COG5001 | Predicted signal transduction protein containing a membrane domain, an EAL and a GGDEF domain             | T  | Signal transduction mechanisms                                |
| fam4_mt | VC_0703* | No duplication | No  | COG3850 | Signal transduction histidine kinase, nitrate/nitrite-specific                                            | T  | Signal transduction mechanisms                                |
| fam4_mu | VC_0704  | No duplication | No  | COG0687 | Spermidine/putrescine-binding periplasmic protein                                                         | E  | Amino acid transport and metabolism                           |
| fam4_mv | VC_0705* | No duplication | No  | COG0077 | Prephenate dehydratase                                                                                    | E  | Amino acid transport and metabolism                           |
| fam4_mv | VC_0705* | No duplication | No  | COG1605 | Chorismate mutase                                                                                         | E  | Amino acid transport and metabolism                           |
| fam4_mw | VC_0706  | No duplication | No  | COG1544 | Ribosome-associated protein Y (PSrp-1)                                                                    | J  | Translation, ribosomal structure and biogenesis               |
| fam4_mx | VC_0709  | No duplication | No  | COG0564 | Pseudouridylate synthases, 23S RNA-specific                                                               | J  | Translation, ribosomal structure and biogenesis               |
| fam4_my | VC_0710  | No duplication | HGT | COG1496 | Uncharacterized conserved protein                                                                         | S  | Function unknown                                              |
| fam4_ef | VC_0714  | No duplication | HGT | No hit  |                                                                                                           |    |                                                               |
| fam4_ee | VC_0715  | No duplication | HGT | COG0778 | Nitroreductase                                                                                            | C  | Energy production and conversion                              |
| fam4_ed | VC_0716  | No duplication | HGT | COG2768 | Uncharacterized Fe-S center protein                                                                       | R  | General function prediction only                              |
| fam4_ec | VC_0717  | No duplication | HGT | COG0826 | Collagenase and related proteases                                                                         | O  | Posttranslational modification, protein turnover, chaperones  |
| fam4_eb | VC_0718  | No duplication | HGT | COG2974 | DNA recombination-dependent growth factor C                                                               | L  | Replication, recombination and repair                         |
| fam4_ea | VC_0719  | No duplication | HGT | COG0745 | Response regulators consisting of a CheY-like receiver domain and a winged-helix DNA-binding domain       | TK | Multiple classes                                              |
| fam4_dz | VC_0720  | No duplication | HGT | COG5002 | Signal transduction histidine kinase                                                                      | T  | Signal transduction mechanisms                                |
| fam4_dy | VC_0721  | No duplication | No  | COG0226 | ABC-type phosphate transport system, periplasmic component                                                | P  | Inorganic ion transport and metabolism                        |
| fam1_ph | VC_0723  | Duplication    | No  | COG0855 | Polyphosphate kinase                                                                                      | P  | Inorganic ion transport and metabolism                        |
| fam4_dw | VC_0724  | No duplication | No  | COG4590 | ABC-type uncharacterized transport system, permease component                                             | R  | General function prediction only                              |
| fam4_dv | VC_0725* | No duplication | No  | COG4985 | ABC-type phosphate transport system, auxiliary component                                                  | P  | Inorganic ion transport and metabolism                        |
| fam4_dv | VC_0725* | No duplication | No  | COG0581 | ABC-type phosphate transport system, permease component                                                   | P  | Inorganic ion transport and metabolism                        |
| fam4_du | VC_0726  | No duplication | No  | COG1117 | ABC-type phosphate transport system, ATPase component                                                     | P  | Inorganic ion transport and metabolism                        |
| fam4_ds | VC_0727  | No duplication | No  | COG0704 | Phosphate uptake regulator                                                                                | P  | Inorganic ion transport and metabolism                        |
| fam4_dr | VC_0728  | No duplication | No  | COG2326 | Uncharacterized conserved protein                                                                         | S  | Function unknown                                              |
| fam4_dq | VC_0730  | No duplication | No  | COG3142 | Uncharacterized protein involved in copper resistance                                                     | P  | Inorganic ion transport and metabolism                        |
| fam4_dp | VC_0731  | No duplication | No  | COG0450 | Peroxiredoxin                                                                                             | O  | Posttranslational modification, protein turnover, chaperones  |
| fam4_do | VC_0732  | No duplication | No  | COG0583 | Transcriptional regulator                                                                                 | K  | Transcription                                                 |
| fam4_dn | VC_0734  | No duplication | HGT | COG2225 | Malate synthase                                                                                           | C  | Energy production and conversion                              |
| fam4_dm | VC_0736  | No duplication | No  | COG2224 | Isocitrate lyase                                                                                          | C  | Energy production and conversion                              |
| fam4_dl | VC_0737  | No duplication | No  | COG0517 | FOG: CBS domain                                                                                           | R  | General function prediction only                              |
| fam4_dk | VC_0739  | No duplication | HGT | COG0809 | S-adenosylmethionine:tRNA-ribosyltransferase-isomerase (queuine synthetase)                               | J  | Translation, ribosomal structure and biogenesis               |
| fam4_dj | VC_0742  | No duplication | HGT | COG1862 | Preprotein translocase subunit YajC                                                                       | U  | Intracellular trafficking, secretion, and vesicular transport |
| fam4_di | VC_0745  | No duplication | No  | COG0483 | Archaeal fructose-1,6-bisphosphatase and related enzymes of inositol monophosphatase family               | G  | Carbohydrate transport and metabolism                         |
| fam4_dh | VC_0746  | No duplication | No  | COG0565 | rRNA methylase                                                                                            | J  | Translation, ribosomal structure and biogenesis               |
| fam4_dg | VC_0747  | No duplication | No  | COG1959 | Predicted transcriptional regulator                                                                       | K  | Transcription                                                 |
| fam4_df | VC_0748  | No duplication | No  | COG1104 | Cysteine sulfinate desulfinate/cysteine desulfurase and related enzymes                                   | E  | Amino acid transport and metabolism                           |
| fam4_de | VC_0750  | No duplication | HGT | COG0316 | Uncharacterized conserved protein                                                                         | S  | Function unknown                                              |
| fam4_dd | VC_0751  | No duplication | No  | COG1076 | DnaJ-domain-containing proteins 1                                                                         | O  | Posttranslational modification, protein turnover, chaperones  |
| fam4_dc | VC_0752  | No duplication | No  | COG0443 | Molecular chaperone                                                                                       | O  | Posttranslational modification, protein turnover, chaperones  |
| fam4_db | VC_0753  | No duplication | HGT | COG0633 | Ferredoxin                                                                                                | C  | Energy production and conversion                              |
| fam4_da | VC_0755  | No duplication | HGT | COG0260 | Leucyl aminopeptidase                                                                                     | E  | Amino acid transport and metabolism                           |
| fam4_cz | VC_0756  | No duplication | No  | COG0105 | Nucleoside diphosphate kinase                                                                             | F  | Nucleotide transport and metabolism                           |
| fam4_cy | VC_0757  | No duplication | No  | COG0820 | Predicted Fe-S-cluster redox enzyme                                                                       | R  | General function prediction only                              |
| fam4_cx | VC_0759  | No duplication | No  | COG0821 | Enzyme involved in the deoxyxylulose pathway of isoprenoid biosynthesis                                   | I  | Lipid transport and metabolism                                |
| fam4_cw | VC_0760  | No duplication | No  | COG0124 | Histidyl-tRNA synthetase                                                                                  | J  | Translation, ribosomal structure and biogenesis               |
| fam4_cv | VC_0761  | No duplication | No  | COG2976 | Uncharacterized protein conserved in bacteria                                                             | S  | Function unknown                                              |
| fam4_cu | VC_0762  | No duplication | No  | COG1520 | FOG: WD40-like repeat                                                                                     | S  | Function unknown                                              |
| fam4_ct | VC_0763  | No duplication | No  | COG1160 | Predicted GTPases                                                                                         | R  | General function prediction only                              |
| fam4_cs | VC_0764  | No duplication | No  | COG2872 | Predicted metal-dependent hydrolases related to alanyl-tRNA synthetase HxxxH domain                       | R  | General function prediction only                              |
| fam1_pf | VC_0765  | Duplication    | No  | No hit  |                                                                                                           |    |                                                               |

Orata et al. Genetic Interactions Between *V. metoecus* and *V. cholerae*

|         |          |                |     |         |                                                                                           |    |                                                               |
|---------|----------|----------------|-----|---------|-------------------------------------------------------------------------------------------|----|---------------------------------------------------------------|
| fam4_cr | VC_0767* | No duplication | No  | COG0516 | IMP dehydrogenase/GMP reductase                                                           | F  | Nucleotide transport and metabolism                           |
| fam4_cr | VC_0767* | No duplication | No  | COG0517 | FOG: CBS domain                                                                           | R  | General function prediction only                              |
| fam4_cq | VC_0769* | No duplication | No  | COG3979 | Uncharacterized protein contain chitin-binding domain type 3                              | R  | General function prediction only                              |
| fam4_cq | VC_0769* | No duplication | No  | COG0810 | Periplasmic protein TonB, links inner and outer membranes                                 | M  | Cell wall/membrane/envelope biogenesis                        |
| fam4_cp | VC_0770  | No duplication | No  | COG1584 | Predicted membrane protein                                                                | S  | Function unknown                                              |
| fam4_co | VC_0784  | No duplication | No  | COG1115 | Na <sup>+</sup> /alanine symporter                                                        | E  | Amino acid transport and metabolism                           |
| fam4_cn | VC_0786  | No duplication | HGT | COG0665 | Glycine/D-amino acid oxidases (deaminating)                                               | E  | Amino acid transport and metabolism                           |
| fam4_cm | VC_0788  | No duplication | No  | COG3805 | Aromatic ring-cleaving dioxygenase                                                        | Q  | Secondary metabolites biosynthesis, transport and catabolism  |
| fam4_cl | VC_0789  | No duplication | No  | No hit  |                                                                                           |    |                                                               |
| fam4_ck | VC_0791  | No duplication | HGT | COG3290 | Signal transduction histidine kinase regulating citrate/malate metabolism                 | T  | Signal transduction mechanisms                                |
| fam4_cj | VC_0792  | No duplication | HGT | COG1883 | Na <sup>+</sup> -transporting methylmalonyl-CoA/oxaloacetate decarboxylase, beta subunit  | C  | Energy production and conversion                              |
| fam4_ci | VC_0794  | No duplication | HGT | COG3630 | Na <sup>+</sup> -transporting methylmalonyl-CoA/oxaloacetate decarboxylase, gamma subunit | C  | Energy production and conversion                              |
| fam1_id | VC_0796  | Duplication    | HGT | COG3053 | Citrate lyase synthetase                                                                  | C  | Energy production and conversion                              |
| fam4_ch | VC_0797  | No duplication | HGT | COG3052 | Citrate lyase, gamma subunit                                                              | C  | Energy production and conversion                              |
| fam1_am | VC_0798  | Duplication    | HGT | COG2301 | Citrate lyase beta subunit                                                                | G  | Carbohydrate transport and metabolism                         |
| fam1_am | VC_0799  | Duplication    | HGT | COG3051 | Citrate lyase, alpha subunit                                                              | C  | Energy production and conversion                              |
| fam4_cg | VC_0800  | No duplication | HGT | COG3697 | Phosphoribosyl-dephospho-CoA transferase (holo-ACP synthetase)                            | HI | Multiple classes                                              |
| fam4_cf | VC_0801  | No duplication | HGT | COG1767 | Triphosphoribosyl-dephospho-CoA synthetase                                                | H  | Coenzyme transport and metabolism                             |
| fam4_ce | VC_0803  | No duplication | HGT | COG0566 | rRNA methylases                                                                           | J  | Translation, ribosomal structure and biogenesis               |
| fam4_cd | VC_0804  | No duplication | HGT | COG1146 | Ferredoxin                                                                                | C  | Energy production and conversion                              |
| fam1_pe | VC_0806  | Duplication    | HGT | COG2509 | Uncharacterized FAD-dependent dehydrogenases                                              | R  | General function prediction only                              |
| fam4_cc | VC_0807  | No duplication | HGT | No hit  |                                                                                           |    |                                                               |
| fam4_cb | VC_0848  | No duplication | HGT | COG0691 | tmRNA-binding protein                                                                     | O  | Posttranslational modification, protein turnover, chaperones  |
| fam4_ca | VC_0849  | No duplication | HGT | COG2867 | Oligoketide cyclase/lipid transport protein                                               | I  | Lipid transport and metabolism                                |
| fam4_bz | VC_0850  | No duplication | HGT | COG2914 | Uncharacterized protein conserved in bacteria                                             | S  | Function unknown                                              |
| fam4_by | VC_0851  | No duplication | HGT | COG2913 | Small protein A (tmRNA-binding)                                                           | J  | Translation, ribosomal structure and biogenesis               |
| fam1_ic | VC_0852  | Duplication    | No  | COG0497 | ATPase involved in DNA repair                                                             | L  | Replication, recombination and repair                         |
| fam4_bx | VC_0853  | No duplication | No  | COG0061 | Predicted sugar kinase                                                                    | G  | Carbohydrate transport and metabolism                         |
| fam4_bv | VC_0856  | No duplication | No  | COG0484 | DnaJ-class molecular chaperone with C-terminal Zn finger domain                           | O  | Posttranslational modification, protein turnover, chaperones  |
| fam4_bu | VC_0857  | No duplication | HGT | COG4968 | Tfp pilus assembly protein PilE                                                           | NU | Multiple classes                                              |
| fam4_bt | VC_0859  | No duplication | HGT | COG4795 | Type II secretory pathway, component PulJ                                                 | U  | Intracellular trafficking, secretion, and vesicular transport |
| fam1_dt | VC_0860  | Duplication    | HGT | COG3156 | Type II secretory pathway, component PulK                                                 | U  | Intracellular trafficking, secretion, and vesicular transport |
| fam4_bs | VC_0861  | No duplication | No  | COG4967 | Tfp pilus assembly protein PilV                                                           | NU | Multiple classes                                              |
| fam4_br | VC_0863  | No duplication | No  | COG2978 | Putative p-aminobenzoyl-glutamate transporter                                             | H  | Coenzyme transport and metabolism                             |
| fam4_bq | VC_0864  | No duplication | No  | COG0590 | Cytosine/adenosine deaminases                                                             | FJ | Multiple classes                                              |
| fam4_bp | VC_0865  | No duplication | No  | No hit  |                                                                                           |    |                                                               |
| fam1_pd | VC_0866  | Duplication    | No  | COG4623 | Predicted soluble lytic transglycosylase fused to an ABC-type amino acid-binding protein  | M  | Cell wall/membrane/envelope biogenesis                        |
| fam1_pc | VC_0869* | Duplication    | No  | COG0046 | Phosphoribosylformylglycinamide (FGAM) synthase, synthetase domain                        | F  | Nucleotide transport and metabolism                           |
| fam1_pc | VC_0869* | Duplication    | No  | COG0047 | Phosphoribosylformylglycinamide (FGAM) synthase, glutamine amidotransferase domain        | F  | Nucleotide transport and metabolism                           |
| fam4_bd | VC_0871  | No duplication | HGT | No hit  |                                                                                           |    |                                                               |
| fam4_bn | VC_0872  | No duplication | HGT | No hit  |                                                                                           |    |                                                               |
| fam4_bm | VC_0875  | No duplication | No  | COG0442 | Prolyl-tRNA synthetase                                                                    | J  | Translation, ribosomal structure and biogenesis               |
| fam4_bl | VC_0876  | No duplication | No  | COG1720 | Uncharacterized conserved protein                                                         | S  | Function unknown                                              |
| fam4_bk | VC_0881  | No duplication | No  | COG1671 | Uncharacterized protein conserved in bacteria                                             | S  | Function unknown                                              |
| fam4_bj | VC_0882  | No duplication | No  | No hit  |                                                                                           |    |                                                               |
| fam4_bi | VC_0884  | No duplication | No  | COG1670 | Acetyltransferases, including N-acetylases of ribosomal proteins                          | J  | Translation, ribosomal structure and biogenesis               |
| fam4_bh | VC_0886  | No duplication | No  | No hit  |                                                                                           |    |                                                               |
| fam4_bg | VC_0887  | No duplication | No  | COG3098 | Uncharacterized protein conserved in bacteria                                             | S  | Function unknown                                              |
| fam4_bf | VC_0888  | No duplication | No  | COG0564 | Pseudouridylate synthases, 23S RNA-specific                                               | J  | Translation, ribosomal structure and biogenesis               |
| fam1_pb | VC_0889  | Duplication    | No  | COG1154 | Deoxyxylulose-5-phosphate synthase                                                        | HI | Multiple classes                                              |
| fam4_be | VC_0890  | No duplication | No  | COG0142 | Geranylgeranyl pyrophosphate synthase                                                     | H  | Coenzyme transport and metabolism                             |
| fam4_bd | VC_0891  | No duplication | No  | COG1722 | Exonuclease VII small subunit                                                             | L  | Replication, recombination and repair                         |
| fam4_bc | VC_0892  | No duplication | No  | COG1291 | Flagellar motor component                                                                 | N  | Cell motility                                                 |
| fam1_ds | VC_0893  | Duplication    | No  | COG1360 | Flagellar motor protein                                                                   | N  | Cell motility                                                 |
| fam1_ib | VC_0894* | Duplication    | No  | COG0301 | Thiamine biosynthesis ATP pyrophosphatase                                                 | H  | Coenzyme transport and metabolism                             |
| fam1_ib | VC_0894* | Duplication    | No  | COG0607 | Rhodanese-related sulfurtransferase                                                       | P  | Inorganic ion transport and metabolism                        |
| fam4_bb | VC_0896  | No duplication | No  | COG0583 | Transcriptional regulator                                                                 | K  | Transcription                                                 |
| fam4_ba | VC_0897  | No duplication | No  | COG2363 | Uncharacterized small membrane protein                                                    | S  | Function unknown                                              |
| fam4_az | VC_0898  | No duplication | No  | COG0258 | 5'-3' exonuclease (including N-terminal domain of Poll)                                   | L  | Replication, recombination and repair                         |
| fam4_ay | VC_0899  | No duplication | No  | COG1611 | Predicted Rossmann fold nucleotide-binding protein                                        | R  | General function prediction only                              |
| fam4_ax | VC_0900  | No duplication | No  | COG2199 | FOG: GGDEF domain                                                                         | T  | Signal transduction mechanisms                                |
| fam1_pa | VC_0901  | Duplication    | No  | No hit  |                                                                                           |    |                                                               |
| fam4_aw | VC_0902* | No duplication | No  | COG2904 | Uncharacterized protein conserved in bacteria                                             | S  | Function unknown                                              |
| fam4_aw | VC_0902* | No duplication | No  | COG0780 | Enzyme related to GTP cyclohydrolase I                                                    | R  | General function prediction only                              |
| fam1_dr | VC_0903  | Duplication    | HGT | No hit  |                                                                                           |    |                                                               |
| fam4_av | VC_0904  | No duplication | No  | COG5595 | Zn-ribbon-containing, possibly nucleic-acid-binding protein                               | R  | General function prediction only                              |
| fam4_au | VC_0905  | No duplication | HGT | COG1464 | ABC-type metal ion transport system, periplasmic component/surface antigen                | P  | Inorganic ion transport and metabolism                        |
| fam4_at | VC_0906  | No duplication | HGT | COG2011 | ABC-type metal ion transport system, permease component                                   | P  | Inorganic ion transport and metabolism                        |

Orata et al. Genetic Interactions Between *V. metoecus* and *V. cholerae*

|         |          |                |     |         |                                                                                        |    |                                                              |
|---------|----------|----------------|-----|---------|----------------------------------------------------------------------------------------|----|--------------------------------------------------------------|
| fam4_as | VC_0907  | No duplication | HGT | COG1135 | ABC-type metal ion transport system, ATPase component                                  | P  | Inorganic ion transport and metabolism                       |
| fam4_ar | VC_0908  | No duplication | No  | COG0241 | Histidinol phosphatase and related phosphatases                                        | E  | Amino acid transport and metabolism                          |
| fam1_bs | VC_0911  | Duplication    | HGT | COG0366 | Glycosidases                                                                           | G  | Carbohydrate transport and metabolism                        |
| fam4_aq | VC_0913  | No duplication | No  | COG0845 | Membrane-fusion protein                                                                | M  | Cell wall/membrane/envelope biogenesis                       |
| fam1_ai | VC_0914  | Duplication    | HGT | COG0841 | Cation/multidrug efflux pump                                                           | V  | Defense mechanisms                                           |
| fam4_ap | VC_0916  | No duplication | No  | COG0394 | Protein-tyrosine-phosphatase                                                           | T  | Signal transduction mechanisms                               |
| fam1_bp | VC_0917  | Duplication    | HGT | COG0381 | UDP-N-acetylglucosamine 2-epimerase                                                    | M  | Cell wall/membrane/envelope biogenesis                       |
| fam1_ct | VC_0918  | Duplication    | HGT | COG0677 | UDP-N-acetyl-D-mannosaminuronate dehydrogenase                                         | M  | Cell wall/membrane/envelope biogenesis                       |
| fam1_co | VC_0925  | Duplication    | HGT | COG0438 | Glycosyltransferase                                                                    | M  | Cell wall/membrane/envelope biogenesis                       |
| fam4_ao | VC_0927  | No duplication | No  | COG1922 | Teichoic acid biosynthesis proteins                                                    | M  | Cell wall/membrane/envelope biogenesis                       |
| fam1_ac | VC_0930  | Duplication    | HGT | No hit  |                                                                                        |    |                                                              |
| fam4_an | VC_0931  | No duplication | No  | COG3307 | Lipid A core - O-antigen ligase and related enzymes                                    | M  | Cell wall/membrane/envelope biogenesis                       |
| fam1_oz | VC_0932  | Duplication    | No  | No hit  |                                                                                        |    |                                                              |
| fam1_oz | VC_0933  | Duplication    | No  | No hit  |                                                                                        |    |                                                              |
| fam1_kf | VC_0934  | Duplication    | No  | COG2148 | Sugar transferases involved in lipopolysaccharide synthesis                            | M  | Cell wall/membrane/envelope biogenesis                       |
| fam4_am | VC_0935  | No duplication | No  | COG5338 | Uncharacterized protein conserved in bacteria                                          | S  | Function unknown                                             |
| fam4_al | VC_0936  | No duplication | No  | COG1596 | Periplasmic protein involved in polysaccharide export                                  | M  | Cell wall/membrane/envelope biogenesis                       |
| fam1_oy | VC_0937* | Duplication    | No  | COG3206 | Uncharacterized protein involved in exopolysaccharide biosynthesis                     | M  | Cell wall/membrane/envelope biogenesis                       |
| fam1_oy | VC_0937* | Duplication    | No  | COG0489 | ATPases involved in chromosome partitioning                                            | D  | Cell cycle control, cell division, chromosome partitioning   |
| fam4_ak | VC_0938  | No duplication | No  | No hit  |                                                                                        |    |                                                              |
| fam4_aj | VC_0939  | No duplication | No  | No hit  |                                                                                        |    |                                                              |
| fam4_ai | VC_0941  | No duplication | No  | COG0112 | Glycine/serine hydroxymethyltransferase                                                | E  | Amino acid transport and metabolism                          |
| fam4_ah | VC_0944  | No duplication | No  | COG0321 | Lipoate-protein ligase B                                                               | H  | Coenzyme transport and metabolism                            |
| fam4_ag | VC_0950  | No duplication | No  | COG0768 | Cell division protein FtsI/penicillin-binding protein 2                                | M  | Cell wall/membrane/envelope biogenesis                       |
| fam4_af | VC_0951  | No duplication | No  | COG1576 | Uncharacterized conserved protein                                                      | S  | Function unknown                                             |
| fam4_ae | VC_0952  | No duplication | No  | COG0799 | Uncharacterized homolog of plant lojap protein                                         | S  | Function unknown                                             |
| fam4_ac | VC_0954  | No duplication | HGT | COG2980 | Rare lipoprotein B                                                                     | M  | Cell wall/membrane/envelope biogenesis                       |
| fam1_ox | VC_0956  | Duplication    | HGT | COG0495 | Leucyl-tRNA synthetase                                                                 | J  | Translation, ribosomal structure and biogenesis              |
| fam4_ab | VC_0957  | No duplication | HGT | No hit  |                                                                                        |    |                                                              |
| fam4_aa | VC_0958  | No duplication | HGT | COG0815 | Apolipoprotein N-acyltransferase                                                       | M  | Cell wall/membrane/envelope biogenesis                       |
| fam3_tf | VC_0959  | No duplication | No  | COG4535 | Putative Mg2+ and Co2+ transporter CorC                                                | P  | Inorganic ion transport and metabolism                       |
| fam3_te | VC_0960  | No duplication | HGT | COG0319 | Predicted metal-dependent hydrolase                                                    | R  | General function prediction only                             |
| fam3_td | VC_0961  | No duplication | HGT | COG1702 | Phosphate starvation-inducible protein PhoH, predicted ATPase                          | T  | Signal transduction mechanisms                               |
| fam3_tc | VC_0970  | No duplication | No  | COG3115 | Cell division protein                                                                  | D  | Cell cycle control, cell division, chromosome partitioning   |
| fam1_ow | VC_0971  | Duplication    | No  | COG0272 | NAD-dependent DNA ligase (contains BRCT domain type II)                                | L  | Replication, recombination and repair                        |
| fam3_ta | VC_0974  | No duplication | No  | COG0789 | Predicted transcriptional regulators                                                   | K  | Transcription                                                |
| fam3_sz | VC_0976  | No duplication | No  | COG0330 | Membrane protease subunits, stomatin/prohibitin homologs                               | O  | Posttranslational modification, protein turnover, chaperones |
| fam3_sy | VC_0977  | No duplication | No  | COG3118 | Thioredoxin domain-containing protein                                                  | O  | Posttranslational modification, protein turnover, chaperones |
| fam3_sx | VC_0979  | No duplication | No  | COG0300 | Short-chain dehydrogenases of various substrate specificities                          | R  | General function prediction only                             |
| fam3_sw | VC_0981  | No duplication | No  | COG0622 | Predicted phosphoesterase                                                              | R  | General function prediction only                             |
| fam3_sv | VC_0982  | No duplication | No  | COG3526 | Uncharacterized protein conserved in bacteria                                          | O  | Posttranslational modification, protein turnover, chaperones |
| fam3_su | VC_0983  | No duplication | No  | No hit  |                                                                                        |    |                                                              |
| fam3_ss | VC_0984  | No duplication | No  | COG3710 | DNA-binding winged-HTH domains                                                         | K  | Transcription                                                |
| fam1_hz | VC_0985  | Duplication    | No  | COG0326 | Molecular chaperone, HSP90 family                                                      | O  | Posttranslational modification, protein turnover, chaperones |
| fam3_sr | VC_0986  | No duplication | No  | COG0563 | Adenylate kinase and related kinases                                                   | F  | Nucleotide transport and metabolism                          |
| fam3_sq | VC_0987  | No duplication | No  | COG0276 | Protoheme ferro-lyase (ferrochelatase)                                                 | H  | Coenzyme transport and metabolism                            |
| fam3_sp | VC_0988  | No duplication | No  | COG3104 | Dipeptide/tripeptide permease                                                          | E  | Amino acid transport and metabolism                          |
| fam3_so | VC_0990  | No duplication | No  | COG0250 | Transcription antiterminator                                                           | K  | Transcription                                                |
| fam1_ou | VC_0991  | Duplication    | No  | COG0367 | Asparagine synthase (glutamine-hydrolyzing)                                            | E  | Amino acid transport and metabolism                          |
| fam1_ot | VC_0992* | Duplication    | No  | COG4651 | Kef-type K+ transport system, predicted NAD-binding component                          | P  | Inorganic ion transport and metabolism                       |
| fam1_ot | VC_0992* | Duplication    | No  | COG1226 | Kef-type K+ transport systems, predicted NAD-binding component                         | P  | Inorganic ion transport and metabolism                       |
| fam3_sn | VC_0993  | No duplication | No  | COG1940 | Transcriptional regulator/sugar kinase                                                 | KG | Multiple classes                                             |
| fam3_sm | VC_0994  | No duplication | No  | COG1820 | N-acetylglucosamine-6-phosphate deacetylase                                            | G  | Carbohydrate transport and metabolism                        |
| fam3_sl | VC_0995* | No duplication | No  | COG1263 | Phosphotransferase system IIC components, glucose/maltose/N-acetylglucosamine-specific | G  | Carbohydrate transport and metabolism                        |
| fam3_sl | VC_0995* | No duplication | No  | COG1264 | Phosphotransferase system IIB components                                               | G  | Carbohydrate transport and metabolism                        |
| fam1_hy | VC_0997  | Duplication    | No  | COG0008 | Glutamyl- and glutaminyl-tRNA synthetases                                              | J  | Translation, ribosomal structure and biogenesis              |
| fam1_ch | VC_0998* | Duplication    | No  | COG3170 | Ttp pilus assembly protein FimV                                                        | NU | Multiple classes                                             |
| fam1_ch | VC_0998* | Duplication    | No  | COG5271 | AAA ATPase containing von Willebrand factor type A (vWA) domain                        | R  | General function prediction only                             |
| fam3_sk | VC_0999  | No duplication | No  | COG0101 | Pseudouridylyl synthase                                                                | J  | Translation, ribosomal structure and biogenesis              |
| fam1_hx | VC_1000  | Duplication    | HGT | COG0777 | Acetyl-CoA carboxylase beta subunit                                                    | I  | Lipid transport and metabolism                               |
| fam3_sj | VC_1001  | No duplication | No  | COG0285 | Folypolyglutamate synthase                                                             | H  | Coenzyme transport and metabolism                            |
| fam3_si | VC_1002  | No duplication | No  | COG3147 | Uncharacterized protein conserved in bacteria                                          | S  | Function unknown                                             |
| fam3_sh | VC_1003  | No duplication | No  | COG1286 | Uncharacterized membrane protein, required for colicin V production                    | R  | General function prediction only                             |
| fam3_sf | VC_1004  | No duplication | No  | COG0034 | Glutamine phosphoribosylpyrophosphate amidotransferase                                 | F  | Nucleotide transport and metabolism                          |
| fam3_se | VC_1005  | No duplication | No  | COG2056 | Predicted permease                                                                     | R  | General function prediction only                             |
| fam3_sd | VC_1006  | No duplication | No  | COG0847 | DNA polymerase III, epsilon subunit and related 3'-5' exonucleases                     | L  | Replication, recombination and repair                        |
| fam3_sc | VC_1016  | No duplication | No  | COG2878 | Predicted NADH:ubiquinone oxidoreductase, subunit RnfB                                 | C  | Energy production and conversion                             |
| fam3_sb | VC_1017  | No duplication | No  | COG4657 | Predicted NADH:ubiquinone oxidoreductase, subunit RnfA                                 | C  | Energy production and conversion                             |

Orata et al. Genetic Interactions Between *V. metoecus* and *V. cholerae*

|         |          |                |     |         |                                                                                                |    |                                                              |
|---------|----------|----------------|-----|---------|------------------------------------------------------------------------------------------------|----|--------------------------------------------------------------|
| fam1_oq | VC_1021  | Duplication    | No  | COG2204 | Response regulator containing CheY-like receiver, AAA-type ATPase, and DNA-binding domains     | T  | Signal transduction mechanisms                               |
| fam3_sa | VC_1022  | No duplication | HGT | No hit  |                                                                                                |    |                                                              |
| fam3_rz | VC_1023  | No duplication | No  | COG0391 | Uncharacterized conserved protein                                                              | S  | Function unknown                                             |
| fam3_ry | VC_1024  | No duplication | No  | COG2896 | Molybdenum cofactor biosynthesis enzyme                                                        | H  | Coenzyme transport and metabolism                            |
| fam3_rx | VC_1025  | No duplication | HGT | COG0521 | Molybdopterin biosynthesis enzymes                                                             | H  | Coenzyme transport and metabolism                            |
| fam3_rv | VC_1026  | No duplication | No  | COG0315 | Molybdenum cofactor biosynthesis enzyme                                                        | H  | Coenzyme transport and metabolism                            |
| fam3_rv | VC_1027  | No duplication | No  | COG1977 | Molybdopterin converting factor, small subunit                                                 | H  | Coenzyme transport and metabolism                            |
| fam3_ru | VC_1028  | No duplication | No  | COG0314 | Molybdopterin converting factor, large subunit                                                 | H  | Coenzyme transport and metabolism                            |
| fam3_rt | VC_1029  | No duplication | No  | COG2199 | FOG: GGDEF domain                                                                              | T  | Signal transduction mechanisms                               |
| fam1_jr | VC_1031  | Duplication    | No  | COG2524 | Predicted transcriptional regulator, contains C-terminal CBS domains                           | K  | Transcription                                                |
| fam1_op | VC_1033  | Duplication    | No  | COG2217 | Cation transport ATPase                                                                        | P  | Inorganic ion transport and metabolism                       |
| fam3_rs | VC_1034  | No duplication | No  | COG2820 | Uridine phosphorylase                                                                          | F  | Nucleotide transport and metabolism                          |
| fam3_rr | VC_1035  | No duplication | No  | No hit  |                                                                                                |    |                                                              |
| fam3_rr | VC_1036* | No duplication | No  | COG0143 | Methionyl-tRNA synthetase                                                                      | J  | Translation, ribosomal structure and biogenesis              |
| fam3_rq | VC_1036* | No duplication | No  | COG0073 | EMAP domain                                                                                    | R  | General function prediction only                             |
| fam3_rp | VC_1037  | No duplication | HGT | COG0489 | ATPases involved in chromosome partitioning                                                    | D  | Cell cycle control, cell division, chromosome partitioning   |
| fam3_ro | VC_1038  | No duplication | HGT | COG0572 | Uridine kinase                                                                                 | F  | Nucleotide transport and metabolism                          |
| fam1_hw | VC_1039  | Duplication    | HGT | COG2982 | Uncharacterized protein involved in outer membrane biogenesis                                  | M  | Cell wall/membrane/envelope biogenesis                       |
| fam3_rm | VC_1040  | No duplication | HGT | COG2109 | ATP:corrinoid adenosyltransferase                                                              | H  | Coenzyme transport and metabolism                            |
| fam3_rm | VC_1041  | No duplication | HGT | COG0394 | Protein-tyrosine-phosphatase                                                                   | T  | Signal transduction mechanisms                               |
| fam3_rl | VC_1042  | No duplication | HGT | COG2067 | Long-chain fatty acid transport protein                                                        | I  | Lipid transport and metabolism                               |
| fam3_rk | VC_1043  | No duplication | HGT | COG2067 | Long-chain fatty acid transport protein                                                        | I  | Lipid transport and metabolism                               |
| fam3_rj | VC_1044  | No duplication | No  | No hit  |                                                                                                |    |                                                              |
| fam3_rh | VC_1045  | No duplication | No  | COG1595 | DNA-directed RNA polymerase specialized sigma subunit, sigma24 homolog                         | K  | Transcription                                                |
| fam3_rg | VC_1046  | No duplication | No  | COG0183 | Acetyl-CoA acetyltransferase                                                                   | I  | Lipid transport and metabolism                               |
| fam3_rf | VC_1047* | No duplication | No  | COG1250 | 3-hydroxyacyl-CoA dehydrogenase                                                                | I  | Lipid transport and metabolism                               |
| fam3_rf | VC_1047* | No duplication | No  | COG1024 | Enoyl-CoA hydratase/carnitine racemase                                                         | I  | Lipid transport and metabolism                               |
| fam3_re | VC_1048  | No duplication | HGT | COG0778 | Nitroreductase                                                                                 | C  | Energy production and conversion                             |
| fam3_rd | VC_1049  | No duplication | No  | COG0583 | Transcriptional regulator                                                                      | K  | Transcription                                                |
| fam3_rc | VC_1050* | No duplication | No  | COG0784 | FOG: CheY-like receiver                                                                        | T  | Signal transduction mechanisms                               |
| fam3_rc | VC_1050* | No duplication | No  | COG2208 | Serine phosphatase RsbU, regulator of sigma subunit                                            | TK | Multiple classes                                             |
| fam3_rb | VC_1051  | No duplication | No  | No hit  |                                                                                                |    |                                                              |
| fam3_ra | VC_1052  | No duplication | No  | COG2832 | Uncharacterized protein conserved in bacteria                                                  | S  | Function unknown                                             |
| fam3_qz | VC_1053  | No duplication | No  | COG0503 | Adenine/guanine phosphoribosyltransferases and related PRPP-binding proteins                   | F  | Nucleotide transport and metabolism                          |
| fam1_oo | VC_1062  | Duplication    | No  | COG1522 | Transcriptional regulators                                                                     | K  | Transcription                                                |
| fam3_qw | VC_1063  | No duplication | No  | COG1946 | Acyl-CoA thioesterase                                                                          | I  | Lipid transport and metabolism                               |
| fam3_qv | VC_1064  | No duplication | No  | COG3126 | Uncharacterized protein conserved in bacteria                                                  | S  | Function unknown                                             |
| fam3_qu | VC_1065  | No duplication | No  | COG3695 | Predicted methylated DNA-protein cysteine methyltransferase                                    | L  | Replication, recombination and repair                        |
| fam3_qt | VC_1066  | No duplication | No  | No hit  |                                                                                                |    |                                                              |
| fam3_qs | VC_1067* | No duplication | No  | COG2199 | FOG: GGDEF domain                                                                              | T  | Signal transduction mechanisms                               |
| fam3_qs | VC_1067* | No duplication | No  | COG0834 | ABC-type amino acid transport/signal transduction systems, periplasmic component/domain        | ET | Multiple classes                                             |
| fam3_qr | VC_1068  | No duplication | HGT | COG0640 | Predicted transcriptional regulators                                                           | K  | Transcription                                                |
| fam3_qq | VC_1069  | No duplication | HGT | COG0057 | Glyceraldehyde-3-phosphate dehydrogenase/erythrose-4-phosphate dehydrogenase                   | G  | Carbohydrate transport and metabolism                        |
| fam3_qp | VC_1070  | No duplication | HGT | COG2453 | Predicted protein-tyrosine phosphatase                                                         | T  | Signal transduction mechanisms                               |
| fam3_qo | VC_1071  | No duplication | HGT | COG2814 | Arabinose efflux permease                                                                      | G  | Carbohydrate transport and metabolism                        |
| fam1_af | VC_1073  | Duplication    | HGT | COG3325 | Chitinase                                                                                      | G  | Carbohydrate transport and metabolism                        |
| fam1_hv | VC_1074  | Duplication    | No  | No hit  |                                                                                                |    |                                                              |
| fam3_qm | VC_1075  | No duplication | HGT | COG1881 | Phospholipid-binding protein                                                                   | R  | General function prediction only                             |
| fam3_ql | VC_1076  | No duplication | No  | COG4977 | Transcriptional regulator containing an amidase domain and an AraC-type DNA-binding HTH domain | K  | Transcription                                                |
| fam3_qk | VC_1077  | No duplication | No  | No hit  |                                                                                                |    |                                                              |
| fam3_qj | VC_1079  | No duplication | No  | COG0009 | Putative translation factor (SUA5)                                                             | J  | Translation, ribosomal structure and biogenesis              |
| fam1_kk | VC_1080  | Duplication    | No  | COG2198 | FOG: HPT domain                                                                                | T  | Signal transduction mechanisms                               |
| fam3_qi | VC_1081* | No duplication | No  | COG1639 | Predicted signal transduction protein                                                          | T  | Signal transduction mechanisms                               |
| fam3_qi | VC_1081* | No duplication | No  | COG0784 | FOG: CheY-like receiver                                                                        | T  | Signal transduction mechanisms                               |
| fam1_on | VC_1082  | Duplication    | No  | COG2204 | Response regulator containing CheY-like receiver, AAA-type ATPase, and DNA-binding domains     | T  | Signal transduction mechanisms                               |
| fam3_qg | VC_1083  | No duplication | No  | COG1776 | Chemotaxis protein CheC, inhibitor of MCP methylation                                          | NT | Multiple classes                                             |
| fam3_qf | VC_1084  | No duplication | No  | COG4191 | Signal transduction histidine kinase regulating C4-dicarboxylate transport system              | T  | Signal transduction mechanisms                               |
| fam3_qe | VC_1085  | No duplication | No  | COG4191 | Signal transduction histidine kinase regulating C4-dicarboxylate transport system              | T  | Signal transduction mechanisms                               |
| fam3_qd | VC_1086* | No duplication | No  | COG2200 | FOG: EAL domain                                                                                | T  | Signal transduction mechanisms                               |
| fam3_qd | VC_1086* | No duplication | No  | COG2204 | Response regulator containing CheY-like receiver, AAA-type ATPase, and DNA-binding domains     | T  | Signal transduction mechanisms                               |
| fam3_qc | VC_1087  | No duplication | No  | COG3437 | Response regulator containing a CheY-like receiver domain and an HD-GYP domain                 | KT | Multiple classes                                             |
| fam3_qb | VC_1089  | No duplication | No  | COG3221 | ABC-type phosphate/phosphonate transport system, periplasmic component                         | P  | Inorganic ion transport and metabolism                       |
| fam3_qa | VC_1091  | No duplication | No  | COG4166 | ABC-type oligopeptide transport system, periplasmic component                                  | E  | Amino acid transport and metabolism                          |
| fam1_om | VC_1092  | Duplication    | No  | COG0601 | ABC-type dipeptide/oligopeptide/nickel transport systems, permease components                  | EP | Multiple classes                                             |
| fam3_py | VC_1093  | No duplication | No  | COG1173 | ABC-type dipeptide/oligopeptide/nickel transport systems, permease components                  | EP | Multiple classes                                             |
| fam3_px | VC_1094  | No duplication | No  | COG0444 | ABC-type dipeptide/oligopeptide/nickel transport system, ATPase component                      | EP | Multiple classes                                             |
| fam3_pw | VC_1095  | No duplication | No  | COG4608 | ABC-type oligopeptide transport system, ATPase component                                       | E  | Amino acid transport and metabolism                          |
| fam3_pv | VC_1096  | No duplication | No  | COG0435 | Predicted glutathione S-transferase                                                            | O  | Posttranslational modification, protein turnover, chaperones |

Orata et al. Genetic Interactions Between *V. metoecus* and *V. cholerae*

|         |          |                |     |         |                                                                                                           |    |                                                              |
|---------|----------|----------------|-----|---------|-----------------------------------------------------------------------------------------------------------|----|--------------------------------------------------------------|
| fam3_pu | VC_1097* | No duplication | No  | COG0280 | Phosphotransacetylase                                                                                     | C  | Energy production and conversion                             |
| fam3_pu | VC_1097* | No duplication | No  | COG0857 | BioD-like N-terminal domain of phosphotransacetylase                                                      | R  | General function prediction only                             |
| fam3_pt | VC_1098  | No duplication | No  | COG0282 | Acetate kinase                                                                                            | C  | Energy production and conversion                             |
| fam3_ps | VC_1099  | No duplication | No  | COG3092 | Uncharacterized protein conserved in bacteria                                                             | S  | Function unknown                                             |
| fam1_ol | VC_1100  | Duplication    | HGT | COG4628 | Uncharacterized conserved protein                                                                         | S  | Function unknown                                             |
| fam3_pr | VC_1101  | No duplication | No  | COG2984 | ABC-type uncharacterized transport system, periplasmic component                                          | R  | General function prediction only                             |
| fam3_pq | VC_1102  | No duplication | No  | COG4120 | ABC-type uncharacterized transport system, permease component                                             | R  | General function prediction only                             |
| fam3_pp | VC_1103  | No duplication | No  | COG1101 | ABC-type uncharacterized transport system, ATPase component                                               | R  | General function prediction only                             |
| fam3_po | VC_1104  | No duplication | HGT | COG2199 | FOG: GGDEF domain                                                                                         | T  | Signal transduction mechanisms                               |
| fam3_pm | VC_1105  | No duplication | HGT | COG0042 | tRNA-dihydrouridine synthase                                                                              | J  | Translation, ribosomal structure and biogenesis              |
| fam3_pn | VC_1106  | No duplication | HGT | COG3318 | Predicted metal-binding protein related to the C-terminal domain of SecA                                  | R  | General function prediction only                             |
| fam3_pl | VC_1107  | No duplication | HGT | COG2834 | Outer membrane lipoprotein-sorting protein                                                                | M  | Cell wall/membrane/envelope biogenesis                       |
| fam3_pk | VC_1108  | No duplication | HGT | COG2256 | ATPase related to the helicase subunit of the Holliday junction resolvase                                 | L  | Replication, recombination and repair                        |
| fam1_ok | VC_1110  | Duplication    | HGT | COG0172 | Seryl-tRNA synthetase                                                                                     | J  | Translation, ribosomal structure and biogenesis              |
| fam1_hu | VC_1111  | Duplication    | HGT | COG0161 | Adenosylmethionine-8-amino-7-oxononanoate aminotransferase                                                | H  | Coenzyme transport and metabolism                            |
| fam1_oj | VC_1112  | Duplication    | HGT | COG0502 | Biotin synthase and related enzymes                                                                       | H  | Coenzyme transport and metabolism                            |
| fam1_oi | VC_1115  | Duplication    | No  | COG0132 | Dethiobiotin synthetase                                                                                   | H  | Coenzyme transport and metabolism                            |
| fam3_ph | VC_1118  | No duplication | No  | COG3631 | Ketosteroid isomerase-related protein                                                                     | R  | General function prediction only                             |
| fam3_pg | VC_1119  | No duplication | HGT | COG0300 | Short-chain dehydrogenases of various substrate specificities                                             | R  | General function prediction only                             |
| fam3_pf | VC_1120  | No duplication | HGT | COG2907 | Predicted NAD/FAD-binding protein                                                                         | R  | General function prediction only                             |
| fam1_oh | VC_1122  | Duplication    | No  | COG2230 | Cyclopropane fatty acid synthase and related methyltransferases                                           | M  | Cell wall/membrane/envelope biogenesis                       |
| fam3_pe | VC_1123  | No duplication | No  | No hit  |                                                                                                           |    |                                                              |
| fam3_pc | VC_1124  | No duplication | No  | No hit  |                                                                                                           |    |                                                              |
| fam5_pd | VC_1125  | No duplication | No  | No hit  |                                                                                                           |    |                                                              |
| fam1_ht | VC_1126  | Duplication    | No  | COG0015 | Adenylosuccinate lyase                                                                                    | F  | Nucleotide transport and metabolism                          |
| fam3_pb | VC_1127  | No duplication | No  | COG2915 | Uncharacterized protein involved in purine metabolism                                                     | R  | General function prediction only                             |
| fam3_pa | VC_1128  | No duplication | No  | COG0482 | Predicted tRNA(5-methylaminomethyl-2-thiouridylate) methyltransferase, contains the PP-loop ATPase domain | J  | Translation, ribosomal structure and biogenesis              |
| fam1_ar | VC_1129  | Duplication    | HGT | COG0524 | Sugar kinases, ribokinase family                                                                          | G  | Carbohydrate transport and metabolism                        |
| fam3_oz | VC_1130  | No duplication | No  | COG2916 | DNA-binding protein H-NS                                                                                  | R  | General function prediction only                             |
| fam1_aj | VC_1131  | Duplication    | HGT | COG1757 | Na+/H+ antiporter                                                                                         | C  | Energy production and conversion                             |
| fam3_oy | VC_1132  | No duplication | HGT | COG0040 | ATP phosphoribosyltransferase                                                                             | E  | Amino acid transport and metabolism                          |
| fam1_cm | VC_1133  | Duplication    | HGT | COG0141 | Histidinol dehydrogenase                                                                                  | E  | Amino acid transport and metabolism                          |
| fam1_fm | VC_1134  | Duplication    | HGT | COG0079 | Histidinol-phosphate/aromatic aminotransferase and coberic acid decarboxylase                             | E  | Amino acid transport and metabolism                          |
| fam1_fl | VC_1135* | Duplication    | HGT | COG0131 | Imidazoleglycerol-phosphate dehydratase                                                                   | E  | Amino acid transport and metabolism                          |
| fam1_fl | VC_1135* | Duplication    | HGT | COG0241 | Histidinol phosphatase and related phosphatases                                                           | E  | Amino acid transport and metabolism                          |
| fam1_fk | VC_1136  | Duplication    | HGT | COG0118 | Glutamine amidotransferase                                                                                | E  | Amino acid transport and metabolism                          |
| fam1_cl | VC_1137  | Duplication    | HGT | COG0106 | Phosphoribosylformimino-5-aminoimidazole carboxamide ribonucleotide (ProFAR) isomerase                    | E  | Amino acid transport and metabolism                          |
| fam1_fj | VC_1138  | Duplication    | HGT | COG0107 | Imidazoleglycerol-phosphate synthase                                                                      | E  | Amino acid transport and metabolism                          |
| fam3_ow | VC_1139* | No duplication | HGT | COG0139 | Phosphoribosyl-AMP cyclohydrolase                                                                         | E  | Amino acid transport and metabolism                          |
| fam3_ow | VC_1139* | No duplication | HGT | COG0140 | Phosphoribosyl-ATP pyrophosphohydrolase                                                                   | E  | Amino acid transport and metabolism                          |
| fam1_og | VC_1140  | Duplication    | HGT | COG1187 | 16S rRNA uridine-516 pseudouridylate synthase and related pseudouridylate synthases                       | J  | Translation, ribosomal structure and biogenesis              |
| fam3_ov | VC_1141  | No duplication | No  | COG2838 | Monomeric isocitrate dehydrogenase                                                                        | C  | Energy production and conversion                             |
| fam3_ou | VC_1142  | No duplication | No  | COG1278 | Cold shock proteins                                                                                       | K  | Transcription                                                |
| fam3_ot | VC_1143  | No duplication | No  | COG2127 | Uncharacterized conserved protein                                                                         | S  | Function unknown                                             |
| fam1_of | VC_1144  | Duplication    | No  | COG0542 | ATPases with chaperone activity, ATP-binding subunit                                                      | O  | Posttranslational modification, protein turnover, chaperones |
| fam3_or | VC_1145  | No duplication | No  | COG2985 | Predicted permease                                                                                        | R  | General function prediction only                             |
| fam3_oo | VC_1146  | No duplication | No  | COG0695 | Glutaredoxin and related proteins                                                                         | O  | Posttranslational modification, protein turnover, chaperones |
| fam3_op | VC_1147  | No duplication | No  | COG1454 | Alcohol dehydrogenase, class IV                                                                           | C  | Energy production and conversion                             |
| fam3_oo | VC_1148  | No duplication | No  | COG1737 | Transcriptional regulators                                                                                | K  | Transcription                                                |
| fam3_on | VC_1149  | No duplication | No  | COG0076 | Glutamate decarboxylase and related PLP-dependent proteins                                                | E  | Amino acid transport and metabolism                          |
| fam3_om | VC_1150  | No duplication | No  | No hit  |                                                                                                           |    |                                                              |
| fam3_ol | VC_1151  | No duplication | No  | COG2431 | Predicted membrane protein                                                                                | S  | Function unknown                                             |
| fam3_ok | VC_1152  | No duplication | No  | COG1639 | Predicted signal transduction protein                                                                     | T  | Signal transduction mechanisms                               |
| fam3_oj | VC_1153  | No duplication | No  | COG3070 | Regulator of competence-specific genes                                                                    | K  | Transcription                                                |
| fam1_hs | VC_1156  | Duplication    | No  | COG0642 | Signal transduction histidine kinase                                                                      | T  | Signal transduction mechanisms                               |
| fam1_hs | VC_1157  | Duplication    | No  | No hit  |                                                                                                           |    |                                                              |
| fam3_oi | VC_1158  | No duplication | No  | COG5339 | Uncharacterized protein conserved in bacteria                                                             | S  | Function unknown                                             |
| fam1_hr | VC_1159  | Duplication    | No  | COG1932 | Phosphoserine aminotransferase                                                                            | HE | Multiple classes                                             |
| fam3_oh | VC_1169  | No duplication | No  | COG0159 | Tryptophan synthase alpha chain                                                                           | E  | Amino acid transport and metabolism                          |
| fam3_ok | VC_1170  | No duplication | No  | COG0133 | Tryptophan synthase beta chain                                                                            | E  | Amino acid transport and metabolism                          |
| fam1_oc | VC_1171* | Duplication    | HGT | COG0134 | Indole-3-glycerol phosphate synthase                                                                      | E  | Amino acid transport and metabolism                          |
| fam1_oc | VC_1171* | Duplication    | HGT | COG0135 | Phosphoribosylanthranilate isomerase                                                                      | E  | Amino acid transport and metabolism                          |
| fam3_of | VC_1172  | No duplication | HGT | COG0547 | Anthranilate phosphoribosyltransferase                                                                    | E  | Amino acid transport and metabolism                          |
| fam3_oe | VC_1173  | No duplication | HGT | COG0512 | Anthranilate/para-aminobenzoate synthases component II                                                    | EH | Multiple classes                                             |
| fam3_od | VC_1174  | No duplication | HGT | COG0147 | Anthranilate/para-aminobenzoate synthases component I                                                     | EH | Multiple classes                                             |
| fam3_oc | VC_1177  | No duplication | No  | COG0613 | Predicted metal-dependent phosphoesterases (PHP family)                                                   | R  | General function prediction only                             |
| fam3_ob | VC_1178  | No duplication | No  | COG0009 | Putative translation factor (SUA5)                                                                        | J  | Translation, ribosomal structure and biogenesis              |
| fam3_oa | VC_1179  | No duplication | No  | COG1187 | 16S rRNA uridine-516 pseudouridylate synthase and related pseudouridylate synthases                       | J  | Translation, ribosomal structure and biogenesis              |



Orata et al. Genetic Interactions Between *V. metoecus* and *V. cholerae*

|         |          |                |     |         |                                                                                                        |    |                                                              |
|---------|----------|----------------|-----|---------|--------------------------------------------------------------------------------------------------------|----|--------------------------------------------------------------|
| fam3_nz | VC_1180  | No duplication | No  | COG4987 | ABC-type transport system involved in cytochrome bd biosynthesis, fused ATPase and permease components | CO | Multiple classes                                             |
| fam1_ob | VC_1181  | Duplication    | No  | COG4988 | ABC-type transport system involved in cytochrome bd biosynthesis, ATPase and permease components       | CO | Multiple classes                                             |
| fam3_ny | VC_1182  | No duplication | No  | COG0492 | Thioredoxin reductase                                                                                  | O  | Posttranslational modification, protein turnover, chaperones |
| fam3_nx | VC_1183  | No duplication | No  | COG4340 | Uncharacterized protein conserved in bacteria                                                          | S  | Function unknown                                             |
| fam3_nw | VC_1184  | No duplication | No  | COG0520 | Selenocysteine lyase                                                                                   | E  | Amino acid transport and metabolism                          |
| fam3_nv | VC_1185  | No duplication | No  | COG2199 | FOG: GGDEF domain                                                                                      | T  | Signal transduction mechanisms                               |
| fam3_nu | VC_1186  | No duplication | No  | COG2949 | Uncharacterized membrane protein                                                                       | S  | Function unknown                                             |
| fam3_nt | VC_1187  | No duplication | No  | No hit  |                                                                                                        |    |                                                              |
| fam3_ns | VC_1188  | No duplication | No  | COG0281 | Malic enzyme                                                                                           | C  | Energy production and conversion                             |
| fam3_nr | VC_1189  | No duplication | No  | No hit  |                                                                                                        |    |                                                              |
| fam3_nq | VC_1190  | No duplication | No  | COG0152 | Phosphoribosylaminoimidazolesuccinocarboxamide (SAICAR) synthase                                       | F  | Nucleotide transport and metabolism                          |
| fam3_np | VC_1191  | No duplication | No  | No hit  |                                                                                                        |    |                                                              |
| fam3_no | VC_1194* | No duplication | No  | COG0790 | FOG: TPR repeat, SEL1 subfamily                                                                        | R  | General function prediction only                             |
| fam3_nn | VC_1194* | No duplication | No  | COG0484 | DnaJ-class molecular chaperone with C-terminal Zn finger domain                                        | O  | Posttranslational modification, protein turnover, chaperones |
| fam3_nm | VC_1195  | No duplication | No  | COG2885 | Outer membrane protein and related peptidoglycan-associated (lipo)proteins                             | M  | Cell wall/membrane/envelope biogenesis                       |
| fam3_nl | VC_1196  | No duplication | No  | No hit  |                                                                                                        |    |                                                              |
| fam3_nk | VC_1197  | No duplication | No  | No hit  |                                                                                                        |    |                                                              |
| fam3_nk | VC_1198* | No duplication | No  | COG0277 | FAD/FMN-containing dehydrogenases                                                                      | C  | Energy production and conversion                             |
| fam3_nk | VC_1198* | No duplication | No  | COG0247 | Fe-S oxidoreductase                                                                                    | C  | Energy production and conversion                             |
| fam1_oa | VC_1199  | Duplication    | HGT | COG2020 | Putative protein-S-isoprenylcysteine methyltransferase                                                 | O  | Posttranslational modification, protein turnover, chaperones |
| fam1_hq | VC_1203  | Duplication    | HGT | COG2987 | Urocanate hydratase                                                                                    | E  | Amino acid transport and metabolism                          |
| fam3_nj | VC_1205  | No duplication | HGT | COG1228 | Imidazolonepropionase and related amidohydrolases                                                      | Q  | Secondary metabolites biosynthesis, transport and catabolism |
| fam3_ni | VC_1206  | No duplication | HGT | COG2188 | Transcriptional regulators                                                                             | K  | Transcription                                                |
| fam3_nh | VC_1208  | No duplication | HGT | COG3099 | Uncharacterized protein conserved in bacteria                                                          | S  | Function unknown                                             |
| fam3_ng | VC_1209  | No duplication | HGT | COG0231 | Translation elongation factor P (EF-P)/translation initiation factor 5A (eIF-5A)                       | J  | Translation, ribosomal structure and biogenesis              |
| fam3_nf | VC_1213  | No duplication | HGT | COG2197 | Response regulator containing a CheY-like receiver domain and an HTH DNA-binding domain                | TK | Multiple classes                                             |
| fam1_nz | VC_1214  | Duplication    | No  | COG0322 | Nuclease subunit of the excinuclease complex                                                           | L  | Replication, recombination and repair                        |
| fam3_ne | VC_1229  | No duplication | No  | COG0679 | Predicted permeases                                                                                    | R  | General function prediction only                             |
| fam3_nd | VC_1231  | No duplication | No  | COG0295 | Cytidine deaminase                                                                                     | F  | Nucleotide transport and metabolism                          |
| fam3_nc | VC_1232  | No duplication | No  | COG1346 | Putative effector of murein hydrolase                                                                  | M  | Cell wall/membrane/envelope biogenesis                       |
| fam3_nb | VC_1233  | No duplication | No  | COG1380 | Putative effector of murein hydrolase LrgA                                                             | R  | General function prediction only                             |
| fam3_na | VC_1234  | No duplication | No  | COG2925 | Exonuclease I                                                                                          | L  | Replication, recombination and repair                        |
| fam3_mz | VC_1235  | No duplication | No  | COG1823 | Predicted Na <sup>+</sup> /dicarboxylate symporter                                                     | R  | General function prediction only                             |
| fam3_my | VC_1237  | No duplication | No  | COG2038 | NaMN:DMB phosphoribosyltransferase                                                                     | H  | Coenzyme transport and metabolism                            |
| fam3_mx | VC_1238  | No duplication | No  | COG0368 | Cobalamin-5-phosphate synthase                                                                         | H  | Coenzyme transport and metabolism                            |
| fam3_mw | VC_1239  | No duplication | No  | COG2087 | Adenosyl cobinamide kinase/adenosyl cobinamide phosphate guanylyltransferase                           | H  | Coenzyme transport and metabolism                            |
| fam3_mv | VC_1240  | No duplication | No  | COG0406 | Fructose-2,6-bisphosphatase                                                                            | G  | Carbohydrate transport and metabolism                        |
| fam3_mu | VC_1242  | No duplication | No  | COG2988 | Succinylglutamate desuccinylase                                                                        | E  | Amino acid transport and metabolism                          |
| fam3_mt | VC_1244  | No duplication | No  | COG4139 | ABC-type cobalamin transport system, permease component                                                | H  | Coenzyme transport and metabolism                            |
| fam3_ms | VC_1246  | No duplication | No  | No hit  |                                                                                                        |    |                                                              |
| fam3_mr | VC_1247  | No duplication | No  | No hit  |                                                                                                        |    |                                                              |
| fam3_mq | VC_1248  | No duplication | No  | COG0840 | Methyl-accepting chemotaxis protein                                                                    | NT | Multiple classes                                             |
| fam3_mp | VC_1249  | No duplication | No  | COG2716 | Glycine cleavage system regulatory protein                                                             | E  | Amino acid transport and metabolism                          |
| fam3_mo | VC_1250  | No duplication | No  | No hit  |                                                                                                        |    |                                                              |
| fam1_hp | VC_1256  | Duplication    | No  | COG0209 | Ribonucleotide reductase, alpha subunit                                                                | F  | Nucleotide transport and metabolism                          |
| fam3_mn | VC_1257  | No duplication | No  | COG2227 | 2-polyprenyl-3-methyl-5-hydroxy-6-methoxy-1,4-benzoquinol methylase                                    | H  | Coenzyme transport and metabolism                            |
| fam3_mm | VC_1259  | No duplication | No  | COG1054 | Predicted sulfurtransferase                                                                            | R  | General function prediction only                             |
| fam3_ml | VC_1260  | No duplication | No  | COG4977 | Transcriptional regulator containing an amidase domain and an AraC-type DNA-binding HTH domain         | K  | Transcription                                                |
| fam1_ny | VC_1261  | Duplication    | No  | COG2814 | Arabinose efflux permease                                                                              | G  | Carbohydrate transport and metabolism                        |
| fam3_mk | VC_1262  | No duplication | No  | No hit  |                                                                                                        |    |                                                              |
| fam3_mj | VC_1263  | No duplication | No  | COG0807 | GTP cyclohydrolase II                                                                                  | H  | Coenzyme transport and metabolism                            |
| fam3_mh | VC_1269  | No duplication | No  | COG3108 | Uncharacterized protein conserved in bacteria                                                          | S  | Function unknown                                             |
| fam1_as | VC_1273  | Duplication    | HGT | COG4663 | TRAP-type mannitol/chloroaromatic compound transport system, periplasmic component                     | Q  | Secondary metabolites biosynthesis, transport and catabolism |
| fam3_mf | VC_1274  | No duplication | No  | COG4665 | TRAP-type mannitol/chloroaromatic compound transport system, small permease component                  | Q  | Secondary metabolites biosynthesis, transport and catabolism |
| fam3_me | VC_1275  | No duplication | No  | COG4664 | TRAP-type mannitol/chloroaromatic compound transport system, large permease component                  | Q  | Secondary metabolites biosynthesis, transport and catabolism |
| fam3_md | VC_1276  | No duplication | No  | COG4564 | Signal transduction histidine kinase                                                                   | T  | Signal transduction mechanisms                               |
| fam3_mc | VC_1277  | No duplication | No  | COG2197 | Response regulator containing a CheY-like receiver domain and an HTH DNA-binding domain                | TK | Multiple classes                                             |
| fam3_mb | VC_1278  | No duplication | No  | COG1846 | Transcriptional regulators                                                                             | K  | Transcription                                                |
| fam3_ma | VC_1279  | No duplication | No  | COG1292 | Choline-glycine betaine transporter                                                                    | M  | Cell wall/membrane/envelope biogenesis                       |
| fam1_nw | VC_1287  | Duplication    | No  | COG2943 | Membrane glycosyltransferase                                                                           | M  | Cell wall/membrane/envelope biogenesis                       |
| fam1_ek | VC_1288  | Duplication    | No  | COG3131 | Periplasmic glucans biosynthesis protein                                                               | P  | Inorganic ion transport and metabolism                       |
| fam3_ly | VC_1289  | No duplication | No  | COG0840 | Methyl-accepting chemotaxis protein                                                                    | NT | Multiple classes                                             |
| fam3_lx | VC_1290  | No duplication | No  | COG0847 | DNA polymerase III, epsilon subunit and related 3'-5' exonucleases                                     | L  | Replication, recombination and repair                        |
| fam3_lw | VC_1291  | No duplication | No  | COG2905 | Predicted signal-transduction protein containing cAMP-binding and CBS domains                          | T  | Signal transduction mechanisms                               |
| fam3_lv | VC_1293  | No duplication | No  | COG1448 | Aspartate/tyrosine/aromatic aminotransferase                                                           | E  | Amino acid transport and metabolism                          |
| fam3_lu | VC_1296  | No duplication | No  | COG0351 | Hydroxymethylpyrimidine/phosphomethylpyrimidine kinase                                                 | H  | Coenzyme transport and metabolism                            |
| fam3_lt | VC_1297  | No duplication | No  | COG0017 | Aspartyl/asparaginyl-tRNA synthetases                                                                  | J  | Translation, ribosomal structure and biogenesis              |
| fam3_ls | VC_1298  | No duplication | No  | COG0840 | Methyl-accepting chemotaxis protein                                                                    | NT | Multiple classes                                             |

Orata et al. Genetic Interactions Between *V. metoecus* and *V. cholerae*

|         |          |                |     |         |                                                                                                            |    |                                                              |
|---------|----------|----------------|-----|---------|------------------------------------------------------------------------------------------------------------|----|--------------------------------------------------------------|
| fam3_lr | VC 1300  | No duplication | No  | COG1760 | L-serine deaminase                                                                                         | E  | Amino acid transport and metabolism                          |
| fam3_lq | VC 1302  | No duplication | No  | COG0494 | NTP pyrophosphohydrolases including oxidative damage repair enzymes                                        | LR | Multiple classes                                             |
| fam3_lp | VC 1303  | No duplication | No  | COG0147 | Anthranilate/para-aminobenzoate synthases component I                                                      | EH | Multiple classes                                             |
| fam3_lo | VC 1304* | No duplication | No  | COG1951 | Tartrate dehydratase alpha subunit/Fumarate hydratase class I, N-terminal domain                           | C  | Energy production and conversion                             |
| fam3_lj | VC 1304* | No duplication | No  | COG1838 | Tartrate dehydratase beta subunit/Fumarate hydratase class I, C-terminal domain                            | C  | Energy production and conversion                             |
| fam3_ln | VC 1305  | No duplication | No  | No hit  |                                                                                                            |    |                                                              |
| fam3_lm | VC 1306  | No duplication | No  | COG3106 | Predicted ATPase                                                                                           | R  | General function prediction only                             |
| fam3_ll | VC 1308  | No duplication | No  | COG3283 | Transcriptional regulator of aromatic amino acids metabolism                                               | KE | Multiple classes                                             |
| fam3_lk | VC 1309  | No duplication | No  | COG1670 | Acetyltransferases, including N-acetylases of ribosomal proteins                                           | J  | Translation, ribosomal structure and biogenesis              |
| fam3_lj | VC 1310  | No duplication | No  | No hit  |                                                                                                            |    |                                                              |
| fam3_li | VC 1311  | No duplication | No  | COG5006 | Predicted permease, DMT superfamily                                                                        | R  | General function prediction only                             |
| fam3_lh | VC 1312  | No duplication | No  | COG0787 | Alanine racemase                                                                                           | M  | Cell wall/membrane/envelope biogenesis                       |
| fam3_lg | VC 1313  | No duplication | No  | COG0840 | Methyl-accepting chemotaxis protein                                                                        | NT | Multiple classes                                             |
| fam1_at | VC 1314  | Duplication    | HGT | COG0471 | Di- and tricarboxylate transporters                                                                        | P  | Inorganic ion transport and metabolism                       |
| fam3_lf | VC 1315* | No duplication | No  | COG4191 | Signal transduction histidine kinase regulating C4-dicarboxylate transport system                          | T  | Signal transduction mechanisms                               |
| fam3_lf | VC 1315* | No duplication | No  | COG0664 | cAMP-binding proteins - catabolite gene activator and regulatory subunit of cAMP-dependent protein kinases | T  | Signal transduction mechanisms                               |
| fam3_le | VC 1316  | No duplication | No  | COG3437 | Response regulator containing a CheY-like receiver domain and an HD-GYP domain                             | KT | Multiple classes                                             |
| fam3_ld | VC 1317  | No duplication | No  | COG2990 | Uncharacterized protein conserved in bacteria                                                              | S  | Function unknown                                             |
| fam3_lc | VC 1318  | No duplication | No  | COG3713 | Outer membrane protein V                                                                                   | M  | Cell wall/membrane/envelope biogenesis                       |
| fam1_nu | VC 1319  | Duplication    | No  | COG0642 | Signal transduction histidine kinase                                                                       | T  | Signal transduction mechanisms                               |
| fam3_lb | VC 1320  | No duplication | No  | COG0745 | Response regulators consisting of a CheY-like receiver domain and a winged-helix DNA-binding domain        | TK | Multiple classes                                             |
| fam3_la | VC 1321  | No duplication | No  | COG0744 | Membrane carboxypeptidase (penicillin-binding protein)                                                     | M  | Cell wall/membrane/envelope biogenesis                       |
| fam3_kz | VC 1323  | No duplication | No  | COG1433 | Uncharacterized conserved protein                                                                          | S  | Function unknown                                             |
| fam3_ky | VC 1325  | No duplication | No  | COG1879 | ABC-type sugar transport system, periplasmic component                                                     | G  | Carbohydrate transport and metabolism                        |
| fam1_ho | VC 1327  | Duplication    | No  | COG1129 | ABC-type sugar transport system, ATPase component                                                          | G  | Carbohydrate transport and metabolism                        |
| fam3_kx | VC 1328  | No duplication | No  | COG4211 | ABC-type glucose/galactose transport system, permease component                                            | G  | Carbohydrate transport and metabolism                        |
| fam3_kw | VC 1332  | No duplication | No  | COG3333 | Uncharacterized protein conserved in bacteria                                                              | S  | Function unknown                                             |
| fam3_kv | VC 1333  | No duplication | No  | No hit  |                                                                                                            |    |                                                              |
| fam3_kt | VC 1334  | No duplication | No  | COG3181 | Uncharacterized protein conserved in bacteria                                                              | S  | Function unknown                                             |
| fam3_ks | VC 1335  | No duplication | HGT | COG1802 | Transcriptional regulators                                                                                 | K  | Transcription                                                |
| fam3_kr | VC 1336  | No duplication | HGT | COG2513 | PEP phosphonmutase and related enzymes                                                                     | G  | Carbohydrate transport and metabolism                        |
| fam3_kq | VC 1337  | No duplication | HGT | COG0372 | Citrate synthase                                                                                           | C  | Energy production and conversion                             |
| fam1_hn | VC 1338  | Duplication    | HGT | COG1048 | Aconitase A                                                                                                | C  | Energy production and conversion                             |
| fam3_kp | VC 1339  | No duplication | HGT | COG2828 | Uncharacterized protein conserved in bacteria                                                              | S  | Function unknown                                             |
| fam3_ko | VC 1341  | No duplication | No  | COG0456 | Acetyltransferases                                                                                         | R  | General function prediction only                             |
| fam3_kn | VC 1342  | No duplication | No  | COG0494 | NTP pyrophosphohydrolases including oxidative damage repair enzymes                                        | LR | Multiple classes                                             |
| fam3_km | VC 1343  | No duplication | No  | COG2195 | Di- and tripeptidases                                                                                      | E  | Amino acid transport and metabolism                          |
| fam1_fd | VC 1344  | Duplication    | No  | COG3185 | 4-hydroxyphenylpyruvate dioxygenase and related hemolysins                                                 | ER | Multiple classes                                             |
| fam1_fe | VC 1345  | Duplication    | HGT | COG3508 | Homogentisate 1,2-dioxygenase                                                                              | Q  | Secondary metabolites biosynthesis, transport and catabolism |
| fam1_ff | VC 1346  | Duplication    | No  | COG0179 | 2-keto-4-pentenolate hydratase/2-oxohepta-3-ene-1,7-dioic acid hydratase (catechol pathway)                | Q  | Secondary metabolites biosynthesis, transport and catabolism |
| fam1_fg | VC 1347  | Duplication    | No  | COG0625 | Glutathione S-transferase                                                                                  | O  | Posttranslational modification, protein turnover, chaperones |
| fam1_fh | VC 1348  | Duplication    | No  | COG3437 | Response regulator containing a CheY-like receiver domain and an HD-GYP domain                             | KT | Multiple classes                                             |
| fam1_ce | VC 1349* | Duplication    | No  | COG0642 | Signal transduction histidine kinase                                                                       | T  | Signal transduction mechanisms                               |
| fam1_ce | VC 1349* | Duplication    | No  | COG0784 | FOG: CheY-like receiver                                                                                    | T  | Signal transduction mechanisms                               |
| fam1_ce | VC 1349* | Duplication    | No  | COG2198 | FOG: HPT domain                                                                                            | T  | Signal transduction mechanisms                               |
| fam1_ce | VC 1349* | Duplication    | No  | COG4753 | Response regulator containing CheY-like receiver domain and AraC-type DNA-binding domain                   | T  | Signal transduction mechanisms                               |
| fam3_kl | VC 1350  | No duplication | No  | COG0678 | Peroxioredoxin                                                                                             | O  | Posttranslational modification, protein turnover, chaperones |
| fam1_dq | VC 1353* | Duplication    | No  | COG3292 | Predicted periplasmic ligand-binding sensor domain                                                         | T  | Signal transduction mechanisms                               |
| fam1_dq | VC 1353* | Duplication    | No  | COG2199 | FOG: GGDEF domain                                                                                          | T  | Signal transduction mechanisms                               |
| fam3_kk | VC 1354  | No duplication | No  | COG1092 | Predicted SAM-dependent methyltransferases                                                                 | R  | General function prediction only                             |
| fam3_ki | VC 1355  | No duplication | No  | COG1254 | Acyphosphatases                                                                                            | C  | Energy production and conversion                             |
| fam3_kh | VC 1356  | No duplication | No  | COG2920 | Dissimilatory sulfite reductase (desulfoviridin), gamma subunit                                            | P  | Inorganic ion transport and metabolism                       |
| fam3_kg | VC 1358  | No duplication | No  | COG0670 | Integral membrane protein, interacts with FtsH                                                             | R  | General function prediction only                             |
| fam3_kf | VC 1360  | No duplication | No  | COG0765 | ABC-type amino acid transport system, permease component                                                   | E  | Amino acid transport and metabolism                          |
| fam3_ke | VC 1361  | No duplication | No  | COG4597 | ABC-type amino acid transport system, permease component                                                   | E  | Amino acid transport and metabolism                          |
| fam3_kd | VC 1362  | No duplication | No  | COG0834 | ABC-type amino acid transport/signal transduction systems, periplasmic component/domain                    | ET | Multiple classes                                             |
| fam3_kc | VC 1363* | No duplication | No  | COG1648 | Siroheme synthase (precorrin-2 oxidase/ferrochelatase domain)                                              | H  | Coenzyme transport and metabolism                            |
| fam3_kc | VC 1363* | No duplication | No  | COG0007 | Uroporphyrinogen-III methylase                                                                             | H  | Coenzyme transport and metabolism                            |
| fam3_kb | VC 1364  | No duplication | No  | COG0561 | Predicted hydrolases of the HAD superfamily                                                                | R  | General function prediction only                             |
| fam3_ka | VC 1365  | No duplication | No  | COG0602 | Organic radical activating enzymes                                                                         | O  | Posttranslational modification, protein turnover, chaperones |
| fam3_jz | VC 1366  | No duplication | No  | COG0603 | Predicted PP-loop superfamily ATPase                                                                       | R  | General function prediction only                             |
| fam1_ns | VC 1367* | Duplication    | No  | COG2199 | FOG: GGDEF domain                                                                                          | T  | Signal transduction mechanisms                               |
| fam1_ns | VC 1367* | Duplication    | No  | COG2976 | Uncharacterized protein conserved in bacteria                                                              | S  | Function unknown                                             |
| fam3_jy | VC 1368  | No duplication | No  | No hit  |                                                                                                            |    |                                                              |
| fam3_jx | VC 1369  | No duplication | No  | COG0715 | ABC-type nitrate/sulfonate/bicarbonate transport systems, periplasmic components                           | P  | Inorganic ion transport and metabolism                       |
| fam3_jw | VC 1370  | No duplication | No  | COG2199 | FOG: GGDEF domain                                                                                          | T  | Signal transduction mechanisms                               |
| fam3_jv | VC 1371  | No duplication | No  | No hit  |                                                                                                            |    |                                                              |
| fam3_ju | VC 1372  | No duplication | No  | COG2199 | FOG: GGDEF domain                                                                                          | T  | Signal transduction mechanisms                               |

Orata et al. Genetic Interactions Between *V. metoecus* and *V. cholerae*

|         |          |                |     |         |                                                                                                            |    |                                                              |
|---------|----------|----------------|-----|---------|------------------------------------------------------------------------------------------------------------|----|--------------------------------------------------------------|
| fam3_it | VC 1373  | No duplication | No  | COG0443 | Molecular chaperone                                                                                        | O  | Posttranslational modification, protein turnover, chaperones |
| fam1_nr | VC 1374  | Duplication    | No  | COG0443 | Molecular chaperone                                                                                        | O  | Posttranslational modification, protein turnover, chaperones |
| fam3_jr | VC 1375  | No duplication | No  | No hit  |                                                                                                            |    |                                                              |
| fam3_jq | VC 1376  | No duplication | No  | COG3614 | Predicted periplasmic ligand-binding sensor domain                                                         | T  | Signal transduction mechanisms                               |
| fam3_jp | VC 1377  | No duplication | No  | COG5018 | Inhibitor of the KinA pathway to sporulation, predicted exonuclease                                        | R  | General function prediction only                             |
| fam3_jo | VC 1379  | No duplication | HGT | COG4103 | Uncharacterized protein conserved in bacteria                                                              | S  | Function unknown                                             |
| fam3_jn | VC 1380  | No duplication | HGT | No hit  |                                                                                                            |    |                                                              |
| fam1_cb | VC 1382  | Duplication    | HGT | COG1643 | HrpA-like helicases                                                                                        | L  | Replication, recombination and repair                        |
| fam3_jm | VC 1384  | No duplication | No  | No hit  |                                                                                                            |    |                                                              |
| fam3_jl | VC 1386  | No duplication | No  | COG0443 | Molecular chaperone                                                                                        | O  | Posttranslational modification, protein turnover, chaperones |
| fam3_jk | VC 1388  | Duplication    | No  | COG0095 | Lipoate-protein ligase A                                                                                   | H  | Coenzyme transport and metabolism                            |
| fam3_jj | VC 1390  | No duplication | No  | COG0583 | Transcriptional regulator                                                                                  | K  | Transcription                                                |
| fam1_nq | VC 1391  | Duplication    | No  | COG2814 | Arabinose efflux permease                                                                                  | G  | Carbohydrate transport and metabolism                        |
| fam3_ji | VC 1393  | No duplication | No  | COG2076 | Membrane transporters of cations and cationic drugs                                                        | P  | Inorganic ion transport and metabolism                       |
| fam3_jf | VC 1414  | No duplication | No  | COG2317 | Zn-dependent carboxypeptidase                                                                              | E  | Amino acid transport and metabolism                          |
| fam1_ab | VC 1416  | Duplication    | HGT | COG3501 | Uncharacterized protein conserved in bacteria                                                              | S  | Function unknown                                             |
| fam3_je | VC 1417  | No duplication | HGT | No hit  |                                                                                                            |    |                                                              |
| fam1_bk | VC 1420  | Duplication    | HGT | No hit  |                                                                                                            |    |                                                              |
| fam3_jc | VC 1421  | No duplication | HGT | COG1280 | Putative threonine efflux protein                                                                          | E  | Amino acid transport and metabolism                          |
| fam3_jb | VC 1422  | No duplication | HGT | COG1115 | Na <sup>+</sup> /alanine symporter                                                                         | E  | Amino acid transport and metabolism                          |
| fam3_ja | VC 1423  | No duplication | No  | COG3264 | Small-conductance mechanosensitive channel                                                                 | M  | Cell wall/membrane/envelope biogenesis                       |
| fam3_iz | VC 1424  | No duplication | No  | COG0687 | Spermidine/putrescine-binding periplasmic protein                                                          | E  | Amino acid transport and metabolism                          |
| fam3_iy | VC 1429  | No duplication | No  | No hit  |                                                                                                            |    |                                                              |
| fam3_ix | VC 1430  | No duplication | No  | COG2992 | Uncharacterized FlgJ-related protein                                                                       | R  | General function prediction only                             |
| fam3_iw | VC 1433  | No duplication | No  | COG0589 | Universal stress protein UspA and related nucleotide-binding proteins                                      | T  | Signal transduction mechanisms                               |
| fam3_iv | VC 1434  | No duplication | No  | COG0864 | cAMP-binding proteins - catabolite gene activator and regulatory subunit of cAMP-dependent protein kinases | T  | Signal transduction mechanisms                               |
| fam1_kc | VC 1436  | Duplication    | No  | COG3197 | Uncharacterized protein, possibly involved in nitrogen fixation                                            | P  | Inorganic ion transport and metabolism                       |
| fam1_cv | VC 1437  | Duplication    | No  | COG2217 | Cation transport ATPase                                                                                    | P  | Inorganic ion transport and metabolism                       |
| fam1_kb | VC 1439  | Duplication    | No  | COG2010 | Cytochrome c, mono- and diheme variants                                                                    | C  | Energy production and conversion                             |
| fam1_ka | VC 1441  | Duplication    | HGT | COG2993 | Cbb3-type cytochrome oxidase, cytochrome c subunit                                                         | C  | Energy production and conversion                             |
| fam1_jz | VC 1442  | Duplication    | No  | COG3278 | Cbb3-type cytochrome oxidase, subunit 1                                                                    | O  | Posttranslational modification, protein turnover, chaperones |
| fam1_cu | VC 1445* | Duplication    | No  | COG0642 | Signal transduction histidine kinase                                                                       | T  | Signal transduction mechanisms                               |
| fam1_cu | VC 1445* | Duplication    | No  | COG0784 | FOG: CheY-like receiver                                                                                    | T  | Signal transduction mechanisms                               |
| fam3_ir | VC 1508  | No duplication | No  | COG1666 | Uncharacterized protein conserved in bacteria                                                              | S  | Function unknown                                             |
| fam1_hi | VC 1552  | Duplication    | HGT | COG3839 | ABC-type sugar transport systems, ATPase components                                                        | G  | Carbohydrate transport and metabolism                        |
| fam3_ik | VC 1553  | No duplication | No  | COG1349 | Transcriptional regulators of sugar metabolism                                                             | KG | Multiple classes                                             |
| fam3_ij | VC 1554  | No duplication | No  | COG0584 | Glycerophosphoryl diester phosphodiesterase                                                                | C  | Energy production and conversion                             |
| fam3_ii | VC 1555  | No duplication | No  | COG2731 | Beta-galactosidase, beta subunit                                                                           | G  | Carbohydrate transport and metabolism                        |
| fam3_ih | VC 1556  | No duplication | HGT | COG0251 | Putative translation initiation inhibitor, yjgF family                                                     | J  | Translation, ribosomal structure and biogenesis              |
| fam1_nl | VC 1557  | Duplication    | HGT | COG1609 | Transcriptional regulators                                                                                 | K  | Transcription                                                |
| fam3_ig | VC 1558  | No duplication | HGT | COG2723 | Beta-glucosidase/6-phospho-beta-glucosidase/beta-galactosidase                                             | G  | Carbohydrate transport and metabolism                        |
| fam3_if | VC 1560  | No duplication | No  | COG0376 | Catalase (peroxidase I)                                                                                    | P  | Inorganic ion transport and metabolism                       |
| fam3_ie | VC 1563  | No duplication | No  | COG0845 | Membrane-fusion protein                                                                                    | M  | Cell wall/membrane/envelope biogenesis                       |
| fam1_hh | VC 1565  | Duplication    | HGT | COG1538 | Outer membrane protein                                                                                     | MU | Multiple classes                                             |
| fam1_do | VC 1567  | Duplication    | HGT | COG0577 | ABC-type antimicrobial peptide transport system, permease component                                        | V  | Defense mechanisms                                           |
| fam3_id | VC 1568  | No duplication | HGT | COG1136 | ABC-type antimicrobial peptide transport system, ATPase component                                          | V  | Defense mechanisms                                           |
| fam5_iv | VC 1570  | No duplication | HGT | COG1294 | Cytochrome bd-type quinol oxidase, subunit 2                                                               | C  | Energy production and conversion                             |
| fam3_ic | VC 1571  | Duplication    | HGT | COG1271 | Cytochrome bd-type quinol oxidase, subunit 1                                                               | C  | Energy production and conversion                             |
| fam3_ib | VC 1574  | No duplication | No  | COG3169 | Uncharacterized protein conserved in bacteria                                                              | S  | Function unknown                                             |
| fam3_ia | VC 1575  | No duplication | HGT | COG3305 | Predicted membrane protein                                                                                 | S  | Function unknown                                             |
| fam3_hz | VC 1594  | No duplication | No  | COG2017 | Galactose mutarotase and related enzymes                                                                   | G  | Carbohydrate transport and metabolism                        |
| fam3_hy | VC 1595  | No duplication | No  | COG0153 | Galactokinase                                                                                              | G  | Carbohydrate transport and metabolism                        |
| fam1_bw | VC 1596  | Duplication    | HGT | COG1085 | Galactose-1-phosphate uridylyltransferase                                                                  | C  | Energy production and conversion                             |
| fam3_hx | VC 1597  | No duplication | No  | COG2814 | Arabinose efflux permease                                                                                  | G  | Carbohydrate transport and metabolism                        |
| fam3_hw | VC 1599  | No duplication | No  | COG2199 | FOG: GGDEF domain                                                                                          | T  | Signal transduction mechanisms                               |
| fam3_hv | VC 1600  | No duplication | No  | COG0551 | Zn-finger domain associated with topoisomerase type I                                                      | L  | Replication, recombination and repair                        |
| fam3_hu | VC 1601  | No duplication | No  | No hit  |                                                                                                            |    |                                                              |
| fam3_ht | VC 1603  | No duplication | No  | COG0834 | ABC-type amino acid transport/signal transduction systems, periplasmic component/domain                    | ET | Multiple classes                                             |
| fam3_hs | VC 1604  | No duplication | No  | COG4565 | Response regulator of citrate/malate metabolism                                                            | KT | Multiple classes                                             |
| fam1_ap | VC 1606  | Duplication    | HGT | COG1538 | Outer membrane protein                                                                                     | MU | Multiple classes                                             |
| fam1_ap | VC 1607  | Duplication    | HGT | COG1566 | Multidrug resistance efflux pump                                                                           | V  | Defense mechanisms                                           |
| fam3_hr | VC 1608  | No duplication | No  | COG0842 | ABC-type multidrug transport system, permease component                                                    | V  | Defense mechanisms                                           |
| fam3_hq | VC 1614  | No duplication | HGT | COG3129 | Predicted SAM-dependent methyltransferase                                                                  | R  | General function prediction only                             |
| fam3_hp | VC 1615  | No duplication | HGT | COG1451 | Predicted metal-dependent hydrolase                                                                        | R  | General function prediction only                             |
| fam1_jk | VC 1616  | Duplication    | HGT | COG0695 | Glutaredoxin and related proteins                                                                          | O  | Posttranslational modification, protein turnover, chaperones |
| fam3_ho | VC 1617  | No duplication | HGT | COG0583 | Transcriptional regulator                                                                                  | K  | Transcription                                                |
| fam3_hn | VC 1618  | No duplication | HGT | COG2814 | Arabinose efflux permease                                                                                  | G  | Carbohydrate transport and metabolism                        |
| fam3_hm | VC 1619  | No duplication | HGT | COG3310 | Uncharacterized protein conserved in bacteria                                                              | S  | Function unknown                                             |

Orata et al. Genetic Interactions Between *V. metoecus* and *V. cholerae*

|         |          |                |     |         |                                                                                                     |    |                                                              |
|---------|----------|----------------|-----|---------|-----------------------------------------------------------------------------------------------------|----|--------------------------------------------------------------|
| fam3_hl | VC_1621  | No duplication | No  | COG1538 | Outer membrane protein                                                                              | MU | Multiple classes                                             |
| fam3_hk | VC_1622  | No duplication | No  | COG2885 | Outer membrane protein and related peptidoglycan-associated (lipo)proteins                          | M  | Cell wall/membrane/envelope biogenesis                       |
| fam3_hj | VC_1624  | No duplication | No  | COG1748 | Saccharopine dehydrogenase and related proteins                                                     | E  | Amino acid transport and metabolism                          |
| fam1_nk | VC_1627  | Duplication    | No  | COG3004 | Na <sup>+</sup> /H <sup>+</sup> antiporter                                                          | P  | Inorganic ion transport and metabolism                       |
| fam1_nj | VC_1629  | Duplication    | No  | COG4591 | ABC-type transport system, involved in lipoprotein release, permease component                      | M  | Cell wall/membrane/envelope biogenesis                       |
| fam3_hi | VC_1630  | No duplication | No  | COG1136 | ABC-type antimicrobial peptide transport system, ATPase component                                   | V  | Defense mechanisms                                           |
| fam3_hh | VC_1634  | No duplication | No  | COG2814 | Arabinose efflux permease                                                                           | G  | Carbohydrate transport and metabolism                        |
| fam3_hg | VC_1635  | No duplication | No  | COG1187 | 16S rRNA uridine-516 pseudouridylate synthase and related pseudouridylate synthases                 | J  | Translation, ribosomal structure and biogenesis              |
| fam3_hf | VC_1636  | No duplication | No  | COG1061 | DNA or RNA helicases of superfamily II                                                              | KL | Multiple classes                                             |
| fam3_he | VC_1638  | No duplication | No  | COG0745 | Response regulators consisting of a CheY-like receiver domain and a winged-helix DNA-binding domain | TK | Multiple classes                                             |
| fam3_hc | VC_1640  | No duplication | No  | COG1825 | Ribosomal protein L25 (general stress protein Ctc)                                                  | J  | Translation, ribosomal structure and biogenesis              |
| fam3_hb | VC_1642  | No duplication | No  | No hit  |                                                                                                     |    |                                                              |
| fam3_ha | VC_1643  | No duplication | No  | COG0840 | Methyl-accepting chemotaxis protein                                                                 | NT | Multiple classes                                             |
| fam5_kx | VC_1649  | No duplication | HGT | COG5640 | Secreted trypsin-like serine protease                                                               | O  | Posttranslational modification, protein turnover, chaperones |
| fam1_jo | VC_1650  | Duplication    | No  | No hit  |                                                                                                     |    |                                                              |
| fam1_hg | VC_1653* | Duplication    | HGT | COG0642 | Signal transduction histidine kinase                                                                | T  | Signal transduction mechanisms                               |
| fam1_hg | VC_1653* | Duplication    | HGT | COG0784 | FOG: CheY-like receiver                                                                             | T  | Signal transduction mechanisms                               |
| fam1_hg | VC_1653* | Duplication    | HGT | COG0834 | ABC-type amino acid transport/signal transduction systems, periplasmic component/domain             | ET | Multiple classes                                             |
| fam1_hg | VC_1653* | Duplication    | HGT | COG2198 | FOG: HPT domain                                                                                     | T  | Signal transduction mechanisms                               |
| fam3_gy | VC_1655  | No duplication | HGT | COG2239 | Mg/Co/Ni transporter MgtE (contains CBS domain)                                                     | P  | Inorganic ion transport and metabolism                       |
| fam3_gx | VC_1656  | No duplication | No  | No hit  |                                                                                                     |    |                                                              |
| fam3_gw | VC_1658  | No duplication | No  | COG0814 | Amino acid permeases                                                                                | E  | Amino acid transport and metabolism                          |
| fam3_gu | VC_1664  | No duplication | No  | COG4134 | ABC-type uncharacterized transport system, periplasmic component                                    | R  | General function prediction only                             |
| fam1_by | VC_1665  | Duplication    | No  | COG4135 | ABC-type uncharacterized transport system, permease component                                       | R  | General function prediction only                             |
| fam3_gt | VC_1666  | No duplication | No  | COG4136 | ABC-type uncharacterized transport system, ATPase component                                         | R  | General function prediction only                             |
| fam3_gs | VC_1667  | No duplication | No  | COG0558 | Phosphatidylglycerophosphate synthase                                                               | I  | Lipid transport and metabolism                               |
| fam3_gr | VC_1668  | No duplication | No  | COG0564 | Pseudouridylate synthases, 23S RNA-specific                                                         | J  | Translation, ribosomal structure and biogenesis              |
| fam3_gg | VC_1670  | No duplication | No  | COG1502 | Phosphatidylserine/phosphatidylglycerophosphate/cardiolipin synthases and related enzymes           | I  | Lipid transport and metabolism                               |
| fam3_gp | VC_1671  | No duplication | No  | COG0626 | Cystathionine beta-lyases/cystathionine gamma-synthases                                             | E  | Amino acid transport and metabolism                          |
| fam3_go | VC_1672  | No duplication | No  | COG2818 | 3-methyladenine DNA glycosylase                                                                     | L  | Replication, recombination and repair                        |
| fam1_aw | VC_1673  | Duplication    | HGT | COG0841 | Cation/multidrug efflux pump                                                                        | V  | Defense mechanisms                                           |
| fam3_gn | VC_1676  | No duplication | No  | COG1983 | Putative stress-responsive transcriptional regulator                                                | KT | Multiple classes                                             |
| fam3_gm | VC_1677  | No duplication | No  | No hit  |                                                                                                     |    |                                                              |
| fam3_gl | VC_1678  | No duplication | No  | COG1842 | Phage shock protein A (IM30), suppresses sigma54-dependent transcription                            | KT | Multiple classes                                             |
| fam3_gk | VC_1679  | No duplication | No  | COG1221 | Transcriptional regulators containing an AAA-type ATPase domain and a DNA-binding domain            | KT | Multiple classes                                             |
| fam3_gj | VC_1680  | No duplication | No  | COG4166 | ABC-type oligopeptide transport system, periplasmic component                                       | E  | Amino acid transport and metabolism                          |
| fam3_gi | VC_1681  | No duplication | No  | COG4168 | ABC-type antimicrobial peptide transport system, permease component                                 | V  | Defense mechanisms                                           |
| fam3_gh | VC_1682  | No duplication | No  | COG4171 | ABC-type antimicrobial peptide transport system, permease component                                 | V  | Defense mechanisms                                           |
| fam3_gg | VC_1683  | No duplication | No  | COG4170 | ABC-type antimicrobial peptide transport system, ATPase component                                   | V  | Defense mechanisms                                           |
| fam1_hf | VC_1684  | Duplication    | No  | COG4167 | ABC-type antimicrobial peptide transport system, ATPase component                                   | V  | Defense mechanisms                                           |
| fam1_ni | VC_1685  | Duplication    | HGT | No hit  |                                                                                                     |    |                                                              |
| fam3_gf | VC_1686  | No duplication | HGT | No hit  |                                                                                                     |    |                                                              |
| fam3_ge | VC_1687  | No duplication | No  | COG1227 | Inorganic pyrophosphatase/exopolyphosphatase                                                        | C  | Energy production and conversion                             |
| fam3_gd | VC_1690  | No duplication | No  | COG3345 | Alpha-galactosidase                                                                                 | G  | Carbohydrate transport and metabolism                        |
| fam1_al | VC_1692  | Duplication    | HGT | COG0243 | Anaerobic dehydrogenases, typically selenocysteine-containing                                       | C  | Energy production and conversion                             |
| fam3_gc | VC_1695  | No duplication | No  | COG2116 | Formate/nitrite family of transporters                                                              | P  | Inorganic ion transport and metabolism                       |
| fam3_gb | VC_1696  | No duplication | No  | No hit  |                                                                                                     |    |                                                              |
| fam3_ga | VC_1697  | No duplication | No  | COG0451 | Nucleoside-diphosphate-sugar epimerases                                                             | MG | Multiple classes                                             |
| fam3_fz | VC_1698  | No duplication | No  | COG1434 | Uncharacterized conserved protein                                                                   | S  | Function unknown                                             |
| fam3_fy | VC_1699  | No duplication | No  | No hit  |                                                                                                     |    |                                                              |
| fam3_fx | VC_1700  | No duplication | No  | COG2917 | Intracellular septation protein A                                                                   | D  | Cell cycle control, cell division, chromosome partitioning   |
| fam3_fw | VC_1701  | No duplication | No  | COG1607 | Acyl-CoA hydrolase                                                                                  | I  | Lipid transport and metabolism                               |
| fam1_nh | VC_1704  | Duplication    | No  | COG0620 | Methionine synthase II (cobalamin-independent)                                                      | E  | Amino acid transport and metabolism                          |
| fam3_fv | VC_1706  | No duplication | No  | COG0583 | Transcriptional regulator                                                                           | K  | Transcription                                                |
| fam3_fu | VC_1707  | No duplication | HGT | No hit  |                                                                                                     |    |                                                              |
| fam3_ft | VC_1708  | No duplication | No  | No hit  |                                                                                                     |    |                                                              |
| fam1_ng | VC_1709  | Duplication    | No  | COG0612 | Predicted Zn-dependent peptidases                                                                   | R  | General function prediction only                             |
| fam1_nf | VC_1710* | Duplication    | No  | COG2200 | FOG: EAL domain                                                                                     | T  | Signal transduction mechanisms                               |
| fam1_nf | VC_1710* | Duplication    | No  | COG2202 | FOG: PAS/PAC domain                                                                                 | T  | Signal transduction mechanisms                               |
| fam1_ne | VC_1711  | Duplication    | HGT | COG1032 | Fe-S oxidoreductase                                                                                 | C  | Energy production and conversion                             |
| fam3_fs | VC_1713  | No duplication | HGT | COG1522 | Transcriptional regulators                                                                          | K  | Transcription                                                |
| fam1_he | VC_1714  | Duplication    | HGT | COG3096 | Uncharacterized protein involved in chromosome partitioning                                         | D  | Cell cycle control, cell division, chromosome partitioning   |
| fam3_fr | VC_1715  | No duplication | HGT | COG3095 | Uncharacterized protein involved in chromosome partitioning                                         | D  | Cell cycle control, cell division, chromosome partitioning   |
| fam3_ft | VC_1716  | No duplication | HGT | COG3006 | Uncharacterized protein involved in chromosome partitioning                                         | D  | Cell cycle control, cell division, chromosome partitioning   |
| fam3_fp | VC_1717  | No duplication | HGT | COG2227 | 2-polyprenyl-3-methyl-5-hydroxy-6-methoxy-1,4-benzoquinol methylase                                 | H  | Coenzyme transport and metabolism                            |
| fam3_fo | VC_1718  | No duplication | No  | COG1434 | Uncharacterized conserved protein                                                                   | S  | Function unknown                                             |
| fam3_fn | VC_1721  | No duplication | No  | COG1609 | Transcriptional regulators                                                                          | K  | Transcription                                                |
| fam3_fm | VC_1722  | No duplication | No  | COG3070 | Regulator of competence-specific genes                                                              | K  | Transcription                                                |

Orata et al. Genetic Interactions Between *V. metoecus* and *V. cholerae*

|         |          |                |     |         |                                                                                         |    |                                                              |
|---------|----------|----------------|-----|---------|-----------------------------------------------------------------------------------------|----|--------------------------------------------------------------|
| fam1_hd | VC_1723  | Duplication    | No  | COG0398 | Uncharacterized conserved protein                                                       | S  | Function unknown                                             |
| fam3_fl | VC_1724  | No duplication | No  | No hit  |                                                                                         |    |                                                              |
| fam3_fk | VC_1725  | No duplication | No  | COG0596 | Predicted hydrolases or acyltransferases (alpha/beta hydrolase superfamily)             | R  | General function prediction only                             |
| fam1_nd | VC_1726  | Duplication    | No  | COG0297 | Glycogen synthase                                                                       | G  | Carbohydrate transport and metabolism                        |
| fam1_nc | VC_1727  | Duplication    | No  | COG0448 | ADP-glucose pyrophosphorylase                                                           | G  | Carbohydrate transport and metabolism                        |
| fam1_nb | VC_1730* | Duplication    | No  | COG0550 | Topoisomerase IA                                                                        | L  | Replication, recombination and repair                        |
| fam1_nb | VC_1730* | Duplication    | No  | COG0551 | Zn-finger domain associated with topoisomerase type I                                   | L  | Replication, recombination and repair                        |
| fam3_fj | VC_1731  | No duplication | No  | No hit  |                                                                                         |    |                                                              |
| fam3_fi | VC_1732  | No duplication | No  | COG0128 | 5-enolpyruvylshikimate-3-phosphate synthase                                             | E  | Amino acid transport and metabolism                          |
| fam3_fh | VC_1735  | No duplication | No  | COG2360 | Leu/Phe-tRNA-protein transferase                                                        | O  | Posttranslational modification, protein turnover, chaperones |
| fam3_ff | VC_1736  | No duplication | No  | COG2935 | Putative arginyl-tRNA:protein arginyltransferase                                        | O  | Posttranslational modification, protein turnover, chaperones |
| fam3_fe | VC_1737  | No duplication | No  | COG0361 | Translation initiation factor 1 (IF-1)                                                  | J  | Translation, ribosomal structure and biogenesis              |
| fam3_fd | VC_1738  | No duplication | No  | COG3007 | Uncharacterized paraquat-inducible protein B                                            | S  | Function unknown                                             |
| fam1_ah | VC_1740  | Duplication    | HGT | COG1960 | Acyl-CoA dehydrogenases                                                                 | I  | Lipid transport and metabolism                               |
| fam3_fc | VC_1741  | No duplication | No  | COG1309 | Transcriptional regulator                                                               | K  | Transcription                                                |
| fam3_fb | VC_1743  | No duplication | No  | COG2515 | 1-aminocyclopropane-1-carboxylate deaminase                                             | E  | Amino acid transport and metabolism                          |
| fam3_fa | VC_1744  | No duplication | No  | No hit  |                                                                                         |    |                                                              |
| fam1_df | VC_1745  | Duplication    | No  | COG1012 | NAD-dependent aldehyde dehydrogenases                                                   | C  | Energy production and conversion                             |
| fam3_ez | VC_1746  | No duplication | No  | COG1309 | Transcriptional regulator                                                               | K  | Transcription                                                |
| fam5_kd | VC_1755  | No duplication | No  | COG3009 | Uncharacterized protein conserved in bacteria                                           | S  | Function unknown                                             |
| fam3_ey | VC_1756  | No duplication | No  | COG0845 | Membrane-fusion protein                                                                 | M  | Cell wall/membrane/envelope biogenesis                       |
| fam1_aw | VC_1757  | Duplication    | HGT | COG0841 | Cation/multidrug efflux pump                                                            | V  | Defense mechanisms                                           |
| fam3_ew | VC_1828  | No duplication | HGT | No hit  |                                                                                         |    |                                                              |
| fam1_na | VC_1831* | Duplication    | No  | COG0642 | Signal transduction histidine kinase                                                    | T  | Signal transduction mechanisms                               |
| fam1_na | VC_1831* | Duplication    | No  | COG0784 | FOG: CheY-like receiver                                                                 | T  | Signal transduction mechanisms                               |
| fam1_mz | VC_1832  | Duplication    | No  | COG3318 | Predicted metal-binding protein related to the C-terminal domain of SecA                | R  | General function prediction only                             |
| fam3_ev | VC_1833  | No duplication | No  | COG0379 | Quinolinate synthase                                                                    | H  | Coenzyme transport and metabolism                            |
| fam3_eu | VC_1834  | No duplication | No  | COG1729 | Uncharacterized protein conserved in bacteria                                           | S  | Function unknown                                             |
| fam3_et | VC_1835  | No duplication | No  | COG2885 | Outer membrane protein and related peptidoglycan-associated (lipo)proteins              | M  | Cell wall/membrane/envelope biogenesis                       |
| fam3_ep | VC_1860  | No duplication | No  | COG0708 | Exonuclease III                                                                         | L  | Replication, recombination and repair                        |
| fam3_eo | VC_1861  | No duplication | No  | COG4160 | ABC-type arginine/histidine transport system, permease component                        | E  | Amino acid transport and metabolism                          |
| fam3_en | VC_1862  | No duplication | No  | COG4215 | ABC-type arginine transport system, permease component                                  | E  | Amino acid transport and metabolism                          |
| fam3_em | VC_1863  | No duplication | No  | COG0834 | ABC-type amino acid transport/signal transduction systems, periplasmic component/domain | ET | Multiple classes                                             |
| fam1_my | VC_1864  | Duplication    | No  | COG4598 | ABC-type histidine transport system, ATPase component                                   | E  | Amino acid transport and metabolism                          |
| fam1_hc | VC_1865  | Duplication    | No  | No hit  |                                                                                         |    |                                                              |
| fam3_el | VC_1866  | No duplication | No  | COG1882 | Pyruvate-formate lyase                                                                  | C  | Energy production and conversion                             |
| fam1_mx | VC_1867  | Duplication    | No  | COG3528 | Uncharacterized protein conserved in bacteria                                           | S  | Function unknown                                             |
| fam3_ek | VC_1868  | No duplication | No  | COG0840 | Methyl-accepting chemotaxis protein                                                     | NT | Multiple classes                                             |
| fam1_mw | VC_1869  | Duplication    | No  | COG1180 | Pyruvate-formate lyase-activating enzyme                                                | O  | Posttranslational modification, protein turnover, chaperones |
| fam3_ej | VC_1870  | No duplication | No  | COG3235 | Predicted membrane protein                                                              | S  | Function unknown                                             |
| fam3_ei | VC_1871  | No duplication | No  | COG3013 | Uncharacterized conserved protein                                                       | S  | Function unknown                                             |
| fam3_eh | VC_1874  | No duplication | No  | COG2719 | Uncharacterized conserved protein                                                       | S  | Function unknown                                             |
| fam3_eg | VC_1875  | No duplication | No  | COG1212 | CMP-2-keto-3-deoxyoctulosonic acid synthetase                                           | M  | Cell wall/membrane/envelope biogenesis                       |
| fam3_ef | VC_1876  | No duplication | No  | COG2835 | Uncharacterized conserved protein                                                       | S  | Function unknown                                             |
| fam3_ee | VC_1877  | No duplication | No  | COG1663 | Tetraacyldisaccharide-1-P 4'-kinase                                                     | M  | Cell wall/membrane/envelope biogenesis                       |
| fam1_hb | VC_1878  | Duplication    | No  | COG1132 | ABC-type multidrug transport system, ATPase and permease components                     | V  | Defense mechanisms                                           |
| fam1_mv | VC_1879  | Duplication    | No  | COG2333 | Predicted hydrolase (metallo-beta-lactamase superfamily)                                | R  | General function prediction only                             |
| fam1_ha | VC_1880  | Duplication    | No  | COG3216 | Uncharacterized protein conserved in bacteria                                           | S  | Function unknown                                             |
| fam3_ed | VC_1882  | No duplication | No  | COG4591 | ABC-type transport system, involved in lipoprotein release, permease component          | M  | Cell wall/membrane/envelope biogenesis                       |
| fam3_ec | VC_1883  | No duplication | No  | COG1136 | ABC-type antimicrobial peptide transport system, ATPase component                       | V  | Defense mechanisms                                           |
| fam3_eb | VC_1884  | No duplication | No  | COG4591 | ABC-type transport system, involved in lipoprotein release, permease component          | M  | Cell wall/membrane/envelope biogenesis                       |
| fam3_ea | VC_1885  | No duplication | No  | No hit  |                                                                                         |    |                                                              |
| fam1_gz | VC_1886  | Duplication    | No  | COG1197 | Transcription-repair coupling factor (superfamily II helicase)                          | LK | Multiple classes                                             |
| fam3_dz | VC_1887  | No duplication | No  | No hit  |                                                                                         |    |                                                              |
| fam1_ac | VC_1888  | Duplication    | HGT | No hit  |                                                                                         |    |                                                              |
| fam3_dx | VC_1889  | No duplication | No  | COG1670 | Acetyltransferases, including N-acetylases of ribosomal proteins                        | J  | Translation, ribosomal structure and biogenesis              |
| fam3_dw | VC_1890  | No duplication | No  | COG1252 | NADH dehydrogenase, FAD-containing subunit                                              | C  | Energy production and conversion                             |
| fam3_dv | VC_1892  | No duplication | No  | COG3150 | Predicted esterase                                                                      | R  | General function prediction only                             |
| fam3_du | VC_1893  | No duplication | No  | COG0510 | Predicted choline kinase involved in LPS biosynthesis                                   | M  | Cell wall/membrane/envelope biogenesis                       |
| fam1_jt | VC_1894  | Duplication    | No  | COG3417 | Collagen-binding surface adhesion SpaP (antigen I/II family)                            | R  | General function prediction only                             |
| fam3_dt | VC_1895  | No duplication | No  | COG5633 | Predicted periplasmic lipoprotein                                                       | R  | General function prediction only                             |
| fam1_mu | VC_1898* | Duplication    | No  | COG0840 | Methyl-accepting chemotaxis protein                                                     | NT | Multiple classes                                             |
| fam1_mu | VC_1898* | Duplication    | No  | COG5278 | Predicted periplasmic ligand-binding sensor domain                                      | T  | Signal transduction mechanisms                               |
| fam3_ds | VC_1899  | No duplication | No  | No hit  |                                                                                         |    |                                                              |
| fam3_dr | VC_1900  | No duplication | No  | COG2186 | Transcriptional regulators                                                              | K  | Transcription                                                |
| fam3_dq | VC_1902  | No duplication | No  | COG1495 | Disulfide bond formation protein DsbB                                                   | O  | Posttranslational modification, protein turnover, chaperones |
| fam3_do | VC_1912  | No duplication | No  | COG2956 | Predicted N-acetylglucosaminyl transferase                                              | G  | Carbohydrate transport and metabolism                        |
| fam3_dn | VC_1925  | No duplication | No  | COG4191 | Signal transduction histidine kinase regulating C4-dicarboxylate transport system       | T  | Signal transduction mechanisms                               |

Orata et al. Genetic Interactions Between *V. metoecus* and *V. cholerae*

|         |          |                |     |         |                                                                                             |     |                                                               |
|---------|----------|----------------|-----|---------|---------------------------------------------------------------------------------------------|-----|---------------------------------------------------------------|
| fam3_dm | VC 1926  | No duplication | No  | COG2204 | Response regulator containing CheY-like receiver, AAA-type ATPase, and DNA-binding domains  | T   | Signal transduction mechanisms                                |
| fam3_dl | VC 1927  | No duplication | No  | COG1593 | TRAP-type C4-dicarboxylate transport system, large permease component                       | G   | Carbohydrate transport and metabolism                         |
| fam3_dk | VC 1928  | No duplication | No  | COG3090 | TRAP-type C4-dicarboxylate transport system, small permease component                       | G   | Carbohydrate transport and metabolism                         |
| fam3_dj | VC 1929  | No duplication | No  | COG1638 | TRAP-type C4-dicarboxylate transport system, periplasmic component                          | G   | Carbohydrate transport and metabolism                         |
| fam3_di | VC 1931  | No duplication | No  | COG0397 | Uncharacterized conserved protein                                                           | S   | Function unknown                                              |
| fam3_dg | VC 1938  | No duplication | No  | COG0824 | Predicted thioesterase                                                                      | R   | General function prediction only                              |
| fam3_df | VC 1939  | No duplication | No  | COG1280 | Putative threonine efflux protein                                                           | E   | Amino acid transport and metabolism                           |
| fam3_de | VC 1940  | Duplication    | No  | COG0560 | Phosphoserine phosphatase                                                                   | E   | Amino acid transport and metabolism                           |
| fam3_dd | VC 1941  | No duplication | No  | COG4645 | Uncharacterized protein conserved in bacteria                                               | S   | Function unknown                                              |
| fam3_dc | VC 1942  | No duplication | No  | COG0190 | 5,10-methylene-tetrahydrofolate dehydrogenase/Methenyl tetrahydrofolate cyclohydrolase      | H   | Coenzyme transport and metabolism                             |
| fam1_al | VC 1950  | Duplication    | HGT | COG0243 | Anaerobic dehydrogenases, typically selenocysteine-containing                               | C   | Energy production and conversion                              |
| fam5_ay | VC 1951  | No duplication | No  | COG3005 | Nitrate/TMAO reductases, membrane-bound tetraheme cytochrome c subunit                      | C   | Energy production and conversion                              |
| fam3_db | VC 1953  | No duplication | HGT | COG1972 | Nucleoside permease                                                                         | F   | Nucleotide transport and metabolism                           |
| fam3_da | VC 1955  | No duplication | No  | COG0583 | Transcriptional regulator                                                                   | K   | Transcription                                                 |
| fam3_cz | VC 1959  | No duplication | No  | COG0850 | Septum formation inhibitor                                                                  | D   | Cell cycle control, cell division, chromosome partitioning    |
| fam3_cy | VC 1960  | No duplication | No  | COG2894 | Septum formation inhibitor-activating ATPase                                                | D   | Cell cycle control, cell division, chromosome partitioning    |
| fam3_cx | VC 1963  | No duplication | No  | COG3492 | Uncharacterized protein conserved in bacteria                                               | S   | Function unknown                                              |
| fam1_ms | VC 1964  | Duplication    | No  | COG4395 | Uncharacterized protein conserved in bacteria                                               | S   | Function unknown                                              |
| fam3_cw | VC 1965  | No duplication | No  | COG1309 | Transcriptional regulator                                                                   | K   | Transcription                                                 |
| fam1_mr | VC 1966  | Duplication    | No  | COG0204 | 1-acyl-sn-glycerol-3-phosphate acyltransferase                                              | I   | Lipid transport and metabolism                                |
| fam3_cu | VC 1971  | No duplication | HGT | COG0318 | Acyl-CoA synthetases (AMP-forming)/AMP-acid ligases II                                      | IQ  | Multiple classes                                              |
| fam3_ct | VC 1972  | No duplication | HGT | COG1441 | O-succinylbenzoate synthase                                                                 | H   | Coenzyme transport and metabolism                             |
| fam3_cs | VC 1973  | No duplication | HGT | COG0447 | Dihydroxynaphthoic acid synthase                                                            | H   | Coenzyme transport and metabolism                             |
| fam3_cr | VC 1974  | No duplication | No  | COG2267 | Lysophospholipase                                                                           | I   | Lipid transport and metabolism                                |
| fam3_cq | VC 1975  | No duplication | No  | COG1165 | 2-succinyl-6-hydroxy-2,4-cyclohexadiene-1-carboxylate synthase                              | H   | Coenzyme transport and metabolism                             |
| fam3_cp | VC 1976  | No duplication | No  | COG1169 | Isochorismate synthase                                                                      | HQ  | Multiple classes                                              |
| fam3_co | VC 1977  | No duplication | No  | COG0436 | Aspartate/tyrosine/aromatic aminotransferase                                                | E   | Amino acid transport and metabolism                           |
| fam3_cn | VC 1978  | No duplication | No  | COG1896 | Predicted hydrolases of HD superfamily                                                      | R   | General function prediction only                              |
| fam3_cm | VC 1979  | No duplication | No  | COG0232 | dGTP triphosphohydrolase                                                                    | F   | Nucleotide transport and metabolism                           |
| fam3_cl | VC 1980  | No duplication | HGT | COG3148 | Uncharacterized conserved protein                                                           | S   | Function unknown                                              |
| fam1_mq | VC 1981  | Duplication    | HGT | COG0705 | Uncharacterized membrane protein (homolog of <i>Drosophila</i> rhomboid)                    | R   | General function prediction only                              |
| fam3_ck | VC 1985  | No duplication | HGT | COG0318 | Acyl-CoA synthetases (AMP-forming)/AMP-acid ligases II                                      | IQ  | Multiple classes                                              |
| fam3_cj | VC 1986  | No duplication | HGT | COG0596 | Predicted hydrolases or acyltransferases (alpha/beta hydrolase superfamily)                 | R   | General function prediction only                              |
| fam3_ci | VC 1987  | No duplication | HGT | COG3065 | Starvation-inducible outer membrane lipoprotein                                             | M   | Cell wall/membrane/envelope biogenesis                        |
| fam3_ch | VC 1988  | No duplication | No  | No hit  |                                                                                             |     |                                                               |
| fam3_cg | VC 1990  | No duplication | No  | COG1199 | Rad3-related DNA helicases                                                                  | KL  | Multiple classes                                              |
| fam1_mp | VC 1992  | Duplication    | No  | COG0788 | Formyltetrahydrofolate hydrolase                                                            | F   | Nucleotide transport and metabolism                           |
| fam3_cf | VC 1993* | No duplication | No  | COG1902 | NADH:flavin oxidoreductases, Old Yellow Enzyme family                                       | C   | Energy production and conversion                              |
| fam3_cj | VC 1993* | No duplication | No  | COG0446 | Uncharacterized NAD(FAD)-dependent dehydrogenases                                           | R   | General function prediction only                              |
| fam3_cd | VC 2001  | No duplication | No  | COG0676 | Uncharacterized enzymes related to aldose 1-epimerase                                       | G   | Carbohydrate transport and metabolism                         |
| fam3_cc | VC 2004  | No duplication | No  | COG3016 | Uncharacterized iron-regulated protein                                                      | S   | Function unknown                                              |
| fam1_mo | VC 2005  | Duplication    | No  | No hit  |                                                                                             |     |                                                               |
| fam3_cb | VC 2006* | No duplication | No  | COG0835 | Chemotaxis signal transduction protein                                                      | NT  | Multiple classes                                              |
| fam3_cb | VC 2006* | No duplication | No  | COG0784 | FOG: CheY-like receiver                                                                     | T   | Signal transduction mechanisms                                |
| fam3_bz | VC 2007  | No duplication | No  | COG1940 | Transcriptional regulator/sugar kinase                                                      | KG  | Multiple classes                                              |
| fam3_by | VC 2008  | No duplication | No  | COG0469 | Pyruvate kinase                                                                             | G   | Carbohydrate transport and metabolism                         |
| fam3_bx | VC 2009  | No duplication | No  | COG4667 | Predicted esterase of the alpha-beta hydrolase superfamily                                  | R   | General function prediction only                              |
| fam3_bw | VC 2011  | No duplication | No  | No hit  |                                                                                             |     |                                                               |
| fam3_bv | VC 2012  | No duplication | No  | COG0733 | Na <sup>+</sup> -dependent transporters of the SNF family                                   | R   | General function prediction only                              |
| fam1_gx | VC 2013* | Duplication    | No  | COG1263 | Phosphotransferase system IIC components, glucose/maltose/N-acetylglucosamine-specific      | G   | Carbohydrate transport and metabolism                         |
| fam1_gx | VC 2013* | Duplication    | No  | COG1264 | Phosphotransferase system IIB components                                                    | G   | Carbohydrate transport and metabolism                         |
| fam3_bu | VC 2014  | No duplication | No  | COG0084 | Mg-dependent DNase                                                                          | L   | Replication, recombination and repair                         |
| fam3_bt | VC 2015  | No duplication | No  | COG0470 | ATPase involved in DNA replication                                                          | L   | Replication, recombination and repair                         |
| fam3_br | VC 2016  | No duplication | No  | COG0125 | Thymidylate kinase                                                                          | F   | Nucleotide transport and metabolism                           |
| fam3_bq | VC 2017  | No duplication | No  | COG1559 | Predicted periplasmic solute-binding protein                                                | R   | General function prediction only                              |
| fam3_bp | VC 2018  | No duplication | No  | COG0115 | Branched-chain amino acid aminotransferase/4-amino-4-deoxychorismate lyase                  | EH  | Multiple classes                                              |
| fam3_bo | VC 2019  | No duplication | No  | COG0304 | 3-oxoacyl-(acyl-carrier-protein) synthase                                                   | IQ  | Multiple classes                                              |
| fam3_bm | VC 2037  | No duplication | No  | COG1757 | Na <sup>+</sup> /H <sup>+</sup> antiporter                                                  | C   | Energy production and conversion                              |
| fam1_mm | VC 2039  | Duplication    | No  | COG3081 | Nucleoid-associated protein                                                                 | R   | General function prediction only                              |
| fam3_bk | VC 2046  | No duplication | No  | No hit  |                                                                                             |     |                                                               |
| fam3_bi | VC 2047  | No duplication | No  | COG1028 | Dehydrogenases with different specificities (related to short-chain alcohol dehydrogenases) | IQR | Multiple classes                                              |
| fam3_bh | VC 2048  | No duplication | No  | COG2853 | Surface lipoprotein                                                                         | M   | Cell wall/membrane/envelope biogenesis                        |
| fam3_bg | VC 2051  | No duplication | No  | COG0526 | Thiol-disulfide isomerase and thioredoxins                                                  | OC  | Multiple classes                                              |
| fam3_bf | VC 2052  | No duplication | No  | COG1138 | Cytochrome c biogenesis factor                                                              | O   | Posttranslational modification, protein turnover, chaperones  |
| fam3_be | VC 2053  | No duplication | No  | COG2332 | Cytochrome c-type biogenesis protein CcmE                                                   | O   | Posttranslational modification, protein turnover, chaperones  |
| fam3_bd | VC 2054  | No duplication | No  | COG3114 | Heme exporter protein D                                                                     | U   | Intracellular trafficking, secretion, and vesicular transport |
| fam1_mk | VC 2055  | Duplication    | No  | COG0755 | ABC-type transport system involved in cytochrome c biogenesis, permease component           | O   | Posttranslational modification, protein turnover, chaperones  |
| fam3_bb | VC 2056  | No duplication | No  | COG2386 | ABC-type transport system involved in cytochrome c biogenesis, permease component           | O   | Posttranslational modification, protein turnover, chaperones  |

Orata et al. Genetic Interactions Between *V. metoecus* and *V. cholerae*

|         |          |                |     |         |                                                                                                                      |     |                                                              |
|---------|----------|----------------|-----|---------|----------------------------------------------------------------------------------------------------------------------|-----|--------------------------------------------------------------|
| fam3_ba | VC 2057  | No duplication | No  | COG4133 | ABC-type transport system involved in cytochrome c biogenesis, ATPase component                                      | O   | Posttranslational modification, protein turnover, chaperones |
| fam3_az | VC 2058  | No duplication | No  | No hit  |                                                                                                                      |     |                                                              |
| fam3_ay | VC 2059  | No duplication | No  | COG0835 | Chemotaxis signal transduction protein                                                                               | NT  | Multiple classes                                             |
| fam1_gw | VC 2060  | Duplication    | No  | No hit  |                                                                                                                      |     |                                                              |
| fam3_ax | VC 2061  | No duplication | No  | COG1192 | ATPases involved in chromosome partitioning                                                                          | D   | Cell cycle control, cell division, chromosome partitioning   |
| fam3_aw | VC 2062  | No duplication | No  | COG2201 | Chemotaxis response regulator containing a CheY-like receiver domain and a methyltransferase domain                  | NT  | Multiple classes                                             |
| fam3_av | VC 2064  | No duplication | No  | COG3143 | Chemotaxis protein                                                                                                   | NT  | Multiple classes                                             |
| fam3_au | VC 2065  | No duplication | No  | COG2204 | Response regulator containing CheY-like receiver, AAA-type ATPase, and DNA-binding domains                           | T   | Signal transduction mechanisms                               |
| fam3_as | VC 2066  | No duplication | No  | COG1191 | DNA-directed RNA polymerase specialized sigma subunit                                                                | K   | Transcription                                                |
| fam3_ar | VC 2067  | No duplication | No  | COG0455 | ATPases involved in chromosome partitioning                                                                          | D   | Cell cycle control, cell division, chromosome partitioning   |
| fam3_aq | VC 2068  | No duplication | No  | COG1419 | Flagellar GTP-binding protein                                                                                        | N   | Cell motility                                                |
| fam1_kl | VC 2069  | Duplication    | No  | COG1298 | Flagellar biosynthesis pathway, component FlhA                                                                       | NU  | Multiple classes                                             |
| fam1_mj | VC 2070  | Duplication    | No  | COG2062 | Phosphohistidine phosphatase SixA                                                                                    | T   | Signal transduction mechanisms                               |
| fam1_gv | VC 2072  | Duplication    | No  | COG1025 | Secreted/periplasmic Zn-dependent peptidases, insulinase-like                                                        | O   | Posttranslational modification, protein turnover, chaperones |
| fam3_ap | VC 2073  | No duplication | No  | COG3102 | Uncharacterized protein conserved in bacteria                                                                        | S   | Function unknown                                             |
| fam3_ao | VC 2074  | No duplication | No  | COG0018 | Arginyl-tRNA synthetase                                                                                              | J   | Translation, ribosomal structure and biogenesis              |
| fam3_an | VC 2075  | No duplication | No  | COG0537 | Diadenosine tetraphosphate (Ap4A) hydrolase and other HIT family hydrolases                                          | FGR | Multiple classes                                             |
| fam3_am | VC 2077  | No duplication | No  | COG0370 | Fe2+ transport system protein B                                                                                      | P   | Inorganic ion transport and metabolism                       |
| fam3_al | VC 2078  | No duplication | No  | COG1918 | Fe2+ transport system protein A                                                                                      | P   | Inorganic ion transport and metabolism                       |
| fam1_cg | VC 2080* | Duplication    | No  | COG3292 | Predicted periplasmic ligand-binding sensor domain                                                                   | T   | Signal transduction mechanisms                               |
| fam1_cg | VC 2080* | Duplication    | No  | COG2207 | AraC-type DNA-binding domain-containing proteins                                                                     | K   | Transcription                                                |
| fam3_ak | VC 2081  | No duplication | No  | COG4531 | ABC-type Zn2+ transport system, periplasmic component/surface adhesin                                                | P   | Inorganic ion transport and metabolism                       |
| fam3_aj | VC 2082  | No duplication | No  | COG1121 | ABC-type Mn/Zn transport systems, ATPase component                                                                   | P   | Inorganic ion transport and metabolism                       |
| fam3_ai | VC 2083  | No duplication | No  | COG1108 | ABC-type Mn2+/Zn2+ transport systems, permease components                                                            | P   | Inorganic ion transport and metabolism                       |
| fam3_ah | VC 2084  | No duplication | No  | COG0074 | Succinyl-CoA synthetase, alpha subunit                                                                               | C   | Energy production and conversion                             |
| fam3_ag | VC 2085  | No duplication | No  | COG0045 | Succinyl-CoA synthetase, beta subunit                                                                                | C   | Energy production and conversion                             |
| fam3_af | VC 2086  | No duplication | No  | COG0508 | Pyruvate/2-oxoglutarate dehydrogenase complex, dihydroliipoamide acyltransferase (E2) component, and related enzymes | C   | Energy production and conversion                             |
| fam1_dm | VC 2087  | Duplication    | No  | COG0567 | 2-oxoglutarate dehydrogenase complex, dehydrogenase (E1) component, and related enzymes                              | C   | Energy production and conversion                             |
| fam3_ad | VC 2088  | No duplication | No  | COG0479 | Succinate dehydrogenase/fumarate reductase, Fe-S protein subunit                                                     | C   | Energy production and conversion                             |
| fam3_ac | VC 2091  | No duplication | No  | COG2009 | Succinate dehydrogenase/fumarate reductase, cytochrome b subunit                                                     | C   | Energy production and conversion                             |
| fam3_ab | VC 2092  | No duplication | No  | COG0372 | Citrate synthase                                                                                                     | C   | Energy production and conversion                             |
| fam3_aa | VC 2094  | No duplication | No  | COG3782 | Uncharacterized protein conserved in bacteria                                                                        | S   | Function unknown                                             |
| fam1_mi | VC 2095  | Duplication    | No  | COG0033 | Phosphoglucomutase                                                                                                   | G   | Carbohydrate transport and metabolism                        |
| fam2_tf | VC 2096  | No duplication | HGT | COG3057 | Negative regulator of replication initiationR                                                                        | L   | Replication, recombination and repair                        |
| fam1_mh | VC 2110* | Duplication    | No  | COG4121 | Uncharacterized conserved protein                                                                                    | S   | Function unknown                                             |
| fam1_mh | VC 2110* | Duplication    | No  | COG0665 | Glycine/D-amino acid oxidases (deaminating)                                                                          | E   | Amino acid transport and metabolism                          |
| fam2_te | VC 2111  | No duplication | HGT | COG0431 | Predicted flavoprotein                                                                                               | R   | General function prediction only                             |
| fam2_td | VC 2113  | No duplication | HGT | COG3101 | Uncharacterized protein conserved in bacteria                                                                        | S   | Function unknown                                             |
| fam2_tc | VC 2115  | No duplication | No  | COG2860 | Predicted membrane protein                                                                                           | S   | Function unknown                                             |
| fam2_tb | VC 2116  | No duplication | No  | COG0082 | Chorismate synthase                                                                                                  | E   | Amino acid transport and metabolism                          |
| fam2_ta | VC 2118  | No duplication | HGT | COG2890 | Methylase of polypeptide chain release factors                                                                       | J   | Translation, ribosomal structure and biogenesis              |
| fam2_sz | VC 2120  | No duplication | No  | COG1377 | Flagellar biosynthesis pathway, component FlhB                                                                       | NU  | Multiple classes                                             |
| fam2_sx | VC 2121  | No duplication | No  | COG1684 | Flagellar biosynthesis pathway, component FlhR                                                                       | NU  | Multiple classes                                             |
| fam2_sw | VC 2122  | No duplication | No  | COG1987 | Flagellar biosynthesis pathway, component FlhQ                                                                       | NU  | Multiple classes                                             |
| fam2_sv | VC 2123  | No duplication | No  | COG1338 | Flagellar biosynthesis pathway, component FlhP                                                                       | NU  | Multiple classes                                             |
| fam2_su | VC 2124  | No duplication | No  | COG3190 | Flagellar biogenesis protein                                                                                         | N   | Cell motility                                                |
| fam2_st | VC 2125  | No duplication | No  | COG1886 | Flagellar motor switch/type III secretory pathway protein                                                            | NU  | Multiple classes                                             |
| fam2_ss | VC 2126  | No duplication | No  | COG1868 | Flagellar motor switch protein                                                                                       | N   | Cell motility                                                |
| fam2_sr | VC 2127  | No duplication | No  | COG1580 | Flagellar basal body-associated protein                                                                              | N   | Cell motility                                                |
| fam1_gu | VC 2128  | Duplication    | No  | COG3144 | Flagellar hook-length control protein                                                                                | N   | Cell motility                                                |
| fam2_sq | VC 2129  | No duplication | No  | COG2882 | Flagellar biosynthesis chaperone                                                                                     | NUO | Multiple classes                                             |
| fam2_sp | VC 2130  | No duplication | No  | COG1157 | Flagellar biosynthesis/type III secretory pathway ATPase                                                             | NU  | Multiple classes                                             |
| fam2_sn | VC 2131  | No duplication | No  | COG1317 | Flagellar biosynthesis/type III secretory pathway protein                                                            | NU  | Multiple classes                                             |
| fam2_sm | VC 2133  | No duplication | No  | COG1766 | Flagellar biosynthesis/type III secretory pathway lipoprotein                                                        | NU  | Multiple classes                                             |
| fam2_sl | VC 2134  | No duplication | No  | COG1677 | Flagellar hook-basal body protein                                                                                    | NU  | Multiple classes                                             |
| fam2_sk | VC 2136  | No duplication | No  | COG0642 | Signal transduction histidine kinase                                                                                 | T   | Signal transduction mechanisms                               |
| fam2_sj | VC 2137  | No duplication | No  | COG2204 | Response regulator containing CheY-like receiver, AAA-type ATPase, and DNA-binding domains                           | T   | Signal transduction mechanisms                               |
| fam2_si | VC 2138  | No duplication | No  | COG1516 | Flagellin-specific chaperone FlhS                                                                                    | NUO | Multiple classes                                             |
| fam2_sh | VC 2139  | No duplication | No  | No hit  |                                                                                                                      |     |                                                              |
| fam2_sg | VC 2140  | No duplication | No  | COG1345 | Flagellar capping protein                                                                                            | N   | Cell motility                                                |
| fam2_sf | VC 2141  | No duplication | No  | COG1334 | Uncharacterized flagellar protein FlaG                                                                               | N   | Cell motility                                                |
| fam1_aa | VC 2142  | Duplication    | HGT | COG1344 | Flagellin and related hook-associated proteins                                                                       | N   | Cell motility                                                |
| fam1_aa | VC 2143  | Duplication    | HGT | COG1344 | Flagellin and related hook-associated proteins                                                                       | N   | Cell motility                                                |
| fam1_gt | VC 2145  | Duplication    | No  | COG2837 | Predicted iron-dependent peroxidase                                                                                  | P   | Inorganic ion transport and metabolism                       |
| fam2_se | VC 2146  | No duplication | No  | No hit  |                                                                                                                      |     |                                                              |
| fam2_sd | VC 2147  | No duplication | No  | No hit  |                                                                                                                      |     |                                                              |
| fam2_sc | VC 2149  | No duplication | No  | COG4519 | Uncharacterized protein conserved in bacteria                                                                        | S   | Function unknown                                             |
| fam2_sb | VC 2150  | No duplication | No  | COG1393 | Arsenate reductase and related proteins, glutaredoxin family                                                         | P   | Inorganic ion transport and metabolism                       |

Orata et al. Genetic Interactions Between *V. metoecus* and *V. cholerae*

|         |          |                |     |         |                                                                                                           |     |                                                              |
|---------|----------|----------------|-----|---------|-----------------------------------------------------------------------------------------------------------|-----|--------------------------------------------------------------|
| fam2_rz | VC_2153  | No duplication | No  | COG1876 | D-alanyl-D-alanine carboxypeptidase                                                                       | M   | Cell wall/membrane/envelope biogenesis                       |
| fam2_ry | VC_2154  | No duplication | No  | No hit  |                                                                                                           |     |                                                              |
| fam2_rx | VC_2156  | No duplication | No  | COG3317 | Uncharacterized lipoprotein                                                                               | M   | Cell wall/membrane/envelope biogenesis                       |
| fam2_rw | VC_2157  | No duplication | No  | COG0329 | Dihydrodipicolinate synthase/N-acetylneuraminase lyase                                                    | EM  | Multiple classes                                             |
| fam2_rv | VC_2159  | No duplication | No  | COG2716 | Glycine cleavage system regulatory protein                                                                | E   | Amino acid transport and metabolism                          |
| fam2_ru | VC_2160  | No duplication | No  | COG1225 | Peroxioredoxin                                                                                            | O   | Posttranslational modification, protein turnover, chaperones |
| fam1_ad | VC_2161  | Duplication    | HGT | COG0840 | Methyl-accepting chemotaxis protein                                                                       | NT  | Multiple classes                                             |
| fam1_gs | VC_2162  | Duplication    | No  | COG0628 | Predicted permease                                                                                        | R   | General function prediction only                             |
| fam2_rt | VC_2163  | No duplication | No  | COG0425 | Predicted redox protein, regulator of disulfide bond formation                                            | O   | Posttranslational modification, protein turnover, chaperones |
| fam2_rr | VC_2164  | No duplication | No  | COG4783 | Putative Zn-dependent protease, contains TPR repeats                                                      | R   | General function prediction only                             |
| fam2_rq | VC_2165  | No duplication | No  | COG1393 | Arsenate reductase and related proteins, glutaredoxin family                                              | P   | Inorganic ion transport and metabolism                       |
| fam2_rp | VC_2166  | No duplication | No  | COG0655 | Multimeric flavodoxin WrbA                                                                                | R   | General function prediction only                             |
| fam2_ro | VC_2167  | No duplication | No  | COG3308 | Predicted membrane protein                                                                                | S   | Function unknown                                             |
| fam2_rn | VC_2168  | No duplication | No  | COG3249 | Uncharacterized protein conserved in bacteria                                                             | S   | Function unknown                                             |
| fam2_rm | VC_2171  | No duplication | No  | COG2233 | Xanthine/uracil permeases                                                                                 | F   | Nucleotide transport and metabolism                          |
| fam2_ri | VC_2172  | No duplication | No  | COG2606 | Uncharacterized conserved protein                                                                         | S   | Function unknown                                             |
| fam2_rf | VC_2174  | No duplication | No  | COG0737 | 5'-nucleotidase/2',3'-cyclic phosphodiesterase and related esterases                                      | F   | Nucleotide transport and metabolism                          |
| fam1_mk | VC_2178  | Duplication    | No  | COG2890 | Methylase of polypeptide chain release factors                                                            | J   | Translation, ribosomal structure and biogenesis              |
| fam1_me | VC_2180  | Duplication    | No  | COG0373 | Glutamyl-tRNA reductase                                                                                   | H   | Coenzyme transport and metabolism                            |
| fam1_aa | VC_2187  | Duplication    | HGT | COG1344 | Flagellin and related hook-associated proteins                                                            | N   | Cell motility                                                |
| fam2_jj | VC_2190  | No duplication | No  | COG1344 | Flagellin and related hook-associated proteins                                                            | N   | Cell motility                                                |
| fam2_ri | VC_2191  | No duplication | No  | COG1256 | Flagellar hook-associated protein                                                                         | N   | Cell motility                                                |
| fam2_rh | VC_2192  | No duplication | No  | COG1705 | Muramidase (flagellum-specific)                                                                           | NU  | Multiple classes                                             |
| fam2_rg | VC_2193  | No duplication | No  | COG1706 | Flagellar basal-body P-ring protein                                                                       | N   | Cell motility                                                |
| fam2_rf | VC_2194  | No duplication | No  | COG2063 | Flagellar basal body L-ring protein                                                                       | N   | Cell motility                                                |
| fam2_re | VC_2195  | No duplication | No  | COG4786 | Flagellar basal body rod protein                                                                          | N   | Cell motility                                                |
| fam2_rd | VC_2196  | No duplication | No  | COG4787 | Flagellar basal body rod protein                                                                          | N   | Cell motility                                                |
| fam2_rc | VC_2197  | No duplication | No  | COG1749 | Flagellar hook protein FlgE                                                                               | N   | Cell motility                                                |
| fam2_ra | VC_2198  | No duplication | No  | COG1843 | Flagellar hook capping protein                                                                            | N   | Cell motility                                                |
| fam1_js | VC_2199  | Duplication    | No  | COG1558 | Flagellar basal body rod protein                                                                          | N   | Cell motility                                                |
| fam2_qz | VC_2200  | No duplication | No  | COG1815 | Flagellar basal body protein                                                                              | N   | Cell motility                                                |
| fam2_qy | VC_2201  | No duplication | No  | COG1352 | Methylase of chemotaxis methyl-accepting proteins                                                         | NT  | Multiple classes                                             |
| fam2_qx | VC_2202* | No duplication | No  | COG0835 | Chemotaxis signal transduction protein                                                                    | NT  | Multiple classes                                             |
| fam2_qx | VC_2202* | No duplication | No  | COG0784 | FOG: CheY-like receiver                                                                                   | T   | Signal transduction mechanisms                               |
| fam2_qw | VC_2203  | No duplication | No  | COG1261 | Flagellar basal body P-ring biosynthesis protein                                                          | NO  | Multiple classes                                             |
| fam2_qv | VC_2204  | No duplication | No  | COG2747 | Negative regulator of flagellin synthesis (anti-sigma28 factor)                                           | KNU | Multiple classes                                             |
| fam2_qu | VC_2205  | No duplication | No  | COG3418 | Flagellar biosynthesis/type III secretory pathway chaperone                                               | NUO | Multiple classes                                             |
| fam2_qt | VC_2206  | No duplication | No  | COG3018 | Uncharacterized protein conserved in bacteria                                                             | S   | Function unknown                                             |
| fam2_qs | VC_2207  | No duplication | No  | COG5616 | Predicted integral membrane protein                                                                       | S   | Function unknown                                             |
| fam2_qq | VC_2208  | No duplication | No  | No hit  |                                                                                                           |     |                                                              |
| fam2_qp | VC_2212  | No duplication | No  | No hit  |                                                                                                           |     |                                                              |
| fam2_qo | VC_2213  | No duplication | No  | COG2885 | Outer membrane protein and related peptidoglycan-associated (lipo)proteins                                | M   | Cell wall/membrane/envelope biogenesis                       |
| fam2_qm | VC_2215  | No duplication | HGT | COG2217 | Cation transport ATPase                                                                                   | P   | Inorganic ion transport and metabolism                       |
| fam2_ql | VC_2216  | No duplication | HGT | COG3019 | Predicted metal-binding protein                                                                           | R   | General function prediction only                             |
| fam2_qj | VC_2221  | No duplication | HGT | No hit  |                                                                                                           |     |                                                              |
| fam2_qi | VC_2222  | No duplication | HGT | COG2840 | Uncharacterized protein conserved in bacteria                                                             | S   | Function unknown                                             |
| fam2_qh | VC_2223  | No duplication | No  | COG1187 | 16S rRNA uridine-516 pseudouridylate synthase and related pseudouridylate synthases                       | J   | Translation, ribosomal structure and biogenesis              |
| fam5_hk | VC_2224  | No duplication | No  | COG2199 | FOG: GGDEF domain                                                                                         | T   | Signal transduction mechanisms                               |
| fam2_qg | VC_2225  | No duplication | No  | COG0035 | Uracil phosphoribosyltransferase                                                                          | F   | Nucleotide transport and metabolism                          |
| fam2_qf | VC_2226  | No duplication | HGT | COG0150 | Phosphoribosylaminoimidazole (AIR) synthetase                                                             | F   | Nucleotide transport and metabolism                          |
| fam2_qe | VC_2227  | No duplication | HGT | COG0299 | Folate-dependent phosphoribosylglycinamide formyltransferase PurN                                         | F   | Nucleotide transport and metabolism                          |
| fam2_qc | VC_2229  | No duplication | HGT | COG0121 | Predicted glutamine amidotransferase                                                                      | R   | General function prediction only                             |
| fam2_qb | VC_2230  | No duplication | HGT | COG0279 | Phosphoheptose isomerase                                                                                  | G   | Carbohydrate transport and metabolism                        |
| fam1_ah | VC_2231  | Duplication    | HGT | COG1960 | Acyl-CoA dehydrogenases                                                                                   | I   | Lipid transport and metabolism                               |
| fam2_qa | VC_2232  | No duplication | No  | No hit  |                                                                                                           |     |                                                              |
| fam2_pz | VC_2233  | No duplication | No  | COG0847 | DNA polymerase III, epsilon subunit and related 3'-5' exonucleases                                        | L   | Replication, recombination and repair                        |
| fam2_py | VC_2234  | No duplication | No  | COG0328 | Ribonuclease HI                                                                                           | L   | Replication, recombination and repair                        |
| fam2_px | VC_2235  | No duplication | No  | COG2226 | Methylase involved in ubiquinone/menaquinone biosynthesis                                                 | H   | Coenzyme transport and metabolism                            |
| fam2_pw | VC_2236  | No duplication | No  | COG0491 | Zn-dependent hydrolases, including glyoxylases                                                            | R   | General function prediction only                             |
| fam2_pv | VC_2237  | No duplication | No  | COG0741 | Soluble lytic murein transglycosylase and related regulatory proteins (some contain LysM/invasin domains) | M   | Cell wall/membrane/envelope biogenesis                       |
| fam2_pu | VC_2238  | No duplication | No  | COG3021 | Uncharacterized protein conserved in bacteria                                                             | S   | Function unknown                                             |
| fam2_ps | VC_2239  | No duplication | No  | COG0347 | Nitrogen regulatory protein PII                                                                           | E   | Amino acid transport and metabolism                          |
| fam2_pr | VC_2241  | No duplication | No  | COG2863 | Cytochrome c553                                                                                           | C   | Energy production and conversion                             |
| fam2_pq | VC_2242  | No duplication | No  | COG0037 | Predicted ATPase of the PP-loop superfamily implicated in cell cycle control                              | D   | Cell cycle control, cell division, chromosome partitioning   |
| fam2_pp | VC_2244  | No duplication | No  | COG0825 | Acetyl-CoA carboxylase alpha subunit                                                                      | I   | Lipid transport and metabolism                               |
| fam2_po | VC_2245  | No duplication | No  | COG0587 | DNA polymerase III, alpha subunit                                                                         | L   | Replication, recombination and repair                        |
| fam2_pn | VC_2247  | No duplication | No  | COG0763 | Lipid A disaccharide synthetase                                                                           | M   | Cell wall/membrane/envelope biogenesis                       |
| fam1_md | VC_2248  | Duplication    | No  | COG1043 | Acyl-[acyl carrier protein]-UDP-N-acetylglucosamine O-acyltransferase                                     | M   | Cell wall/membrane/envelope biogenesis                       |



Orata et al. Genetic Interactions Between *V. metoecus* and *V. cholerae*

|         |          |                |     |         |                                                                                                 |    |                                                              |
|---------|----------|----------------|-----|---------|-------------------------------------------------------------------------------------------------|----|--------------------------------------------------------------|
| fam2_pl | VC 2249  | No duplication | No  | COG0764 | 3-hydroxymyristoyl/3-hydroxydecanoyl-(acyl carrier protein) dehydratases                        | I  | Lipid transport and metabolism                               |
| fam2_pk | VC 2250  | No duplication | No  | COG1044 | UDP-3-O-[3-hydroxymyristoyl] glucosamine N-acyltransferase                                      | M  | Cell wall/membrane/envelope biogenesis                       |
| fam2_pj | VC 2252  | No duplication | No  | COG4775 | Outer membrane protein/protective antigen OMA87                                                 | M  | Cell wall/membrane/envelope biogenesis                       |
| fam2_ph | VC 2261  | No duplication | No  | COG0024 | Methionine aminopeptidase                                                                       | J  | Translation, ribosomal structure and biogenesis              |
| fam2_pg | VC 2262  | No duplication | No  | COG2844 | UTP:GlnB (protein PII) uridylyltransferase                                                      | O  | Posttranslational modification, protein turnover, chaperones |
| fam2_pd | VC 2269* | No duplication | No  | COG0108 | 3,4-dihydroxy-2-butanone 4-phosphate synthase                                                   | H  | Coenzyme transport and metabolism                            |
| fam2_pd | VC 2269* | No duplication | No  | COG0807 | GTP cyclohydrolase II                                                                           | H  | Coenzyme transport and metabolism                            |
| fam2_pc | VC 2270  | No duplication | No  | COG0307 | Riboflavin synthase alpha chain                                                                 | H  | Coenzyme transport and metabolism                            |
| fam2_pb | VC 2271* | No duplication | No  | COG0117 | Pyrimidine deaminase                                                                            | H  | Coenzyme transport and metabolism                            |
| fam2_pa | VC 2271* | No duplication | No  | COG1985 | Pyrimidine reductase, riboflavin biosynthesis                                                   | H  | Coenzyme transport and metabolism                            |
| fam2_pb | VC 2272  | No duplication | HGT | COG1327 | Predicted transcriptional regulator, consists of a Zn-ribbon and ATP-cone domains               | K  | Transcription                                                |
| fam2_oz | VC 2273  | No duplication | No  | COG0014 | Gamma-glutamyl phosphate reductase                                                              | E  | Amino acid transport and metabolism                          |
| fam1_mb | VC 2274  | Duplication    | No  | COG0263 | Glutamate 5-kinase                                                                              | E  | Amino acid transport and metabolism                          |
| fam2_oy | VC 2278  | No duplication | No  | COG2252 | Permeases                                                                                       | R  | General function prediction only                             |
| fam2_ox | VC 2279  | No duplication | No  | COG2195 | Di- and tripeptidases                                                                           | E  | Amino acid transport and metabolism                          |
| fam2_ow | VC 2280  | No duplication | No  | COG4067 | Uncharacterized protein conserved in archaea                                                    | O  | Posttranslational modification, protein turnover, chaperones |
| fam2_ov | VC 2281  | No duplication | No  | COG0189 | Glutathione synthase/Ribosomal protein S6 modification enzyme (glutaminyl transferase)          | HJ | Multiple classes                                             |
| fam2_ou | VC 2282  | No duplication | No  | COG3608 | Predicted deacylase                                                                             | R  | General function prediction only                             |
| fam2_ot | VC 2283  | No duplication | No  | COG0733 | Na <sup>+</sup> -dependent transporters of the SNF family                                       | R  | General function prediction only                             |
| fam2_os | VC 2285* | No duplication | No  | COG0733 | Predicted periplasmic ligand-binding sensor domain                                              | T  | Signal transduction mechanisms                               |
| fam2_os | VC 2285* | No duplication | No  | COG3322 | FOG: GGDEF domain                                                                               | T  | Signal transduction mechanisms                               |
| fam2_or | VC 2286  | No duplication | No  | No hit  |                                                                                                 |    |                                                              |
| fam2_oq | VC 2287  | No duplication | No  | COG0389 | Nucleotidyltransferase/DNA polymerase involved in DNA repair                                    | L  | Replication, recombination and repair                        |
| fam2_op | VC 2288  | No duplication | No  | COG2991 | Uncharacterized protein conserved in bacteria                                                   | S  | Function unknown                                             |
| fam2_oo | VC 2289  | No duplication | No  | COG1477 | Membrane-associated lipoprotein involved in thiamine biosynthesis                               | H  | Coenzyme transport and metabolism                            |
| fam2_on | VC 2290  | No duplication | No  | COG2871 | Na <sup>+</sup> -transporting NADH:ubiquinone oxidoreductase, subunit NqrF                      | C  | Energy production and conversion                             |
| fam2_om | VC 2292  | No duplication | No  | COG1347 | Na <sup>+</sup> -transporting NADH:ubiquinone oxidoreductase, subunit NqrD                      | C  | Energy production and conversion                             |
| fam2_ol | VC 2293  | No duplication | No  | COG2869 | Na <sup>+</sup> -transporting NADH:ubiquinone oxidoreductase, subunit NqrC                      | C  | Energy production and conversion                             |
| fam2_ok | VC 2294  | No duplication | No  | COG1805 | Na <sup>+</sup> -transporting NADH:ubiquinone oxidoreductase, subunit NqrB                      | C  | Energy production and conversion                             |
| fam2_oj | VC 2295  | No duplication | No  | COG1726 | Na <sup>+</sup> -transporting NADH:ubiquinone oxidoreductase, subunit NqrA                      | C  | Energy production and conversion                             |
| fam2_oi | VC 2296  | No duplication | No  | COG0271 | Stress-induced morphogen (activity unknown)                                                     | T  | Signal transduction mechanisms                               |
| fam1_ma | VC 2297  | Duplication    | No  | COG2813 | 16S RNA G1207 methylase RsmC                                                                    | J  | Translation, ribosomal structure and biogenesis              |
| fam2_oh | VC 2298  | No duplication | No  | COG3056 | Uncharacterized lipoprotein                                                                     | M  | Cell wall/membrane/envelope biogenesis                       |
| fam2_og | VC 2299  | No duplication | No  | COG0652 | Peptidyl-prolyl cis-trans isomerase (rotamase) - cyclophilin family                             | O  | Posttranslational modification, protein turnover, chaperones |
| fam2_oe | VC 2300  | No duplication | No  | No hit  |                                                                                                 |    |                                                              |
| fam2_od | VC 2301  | No duplication | No  | COG3806 | Anti-sigma factor                                                                               | T  | Signal transduction mechanisms                               |
| fam1_lz | VC 2302  | Duplication    | No  | COG1595 | DNA-directed RNA polymerase specialized sigma subunit, sigma24 homolog                          | K  | Transcription                                                |
| fam2_oc | VC 2305  | No duplication | HGT | COG3248 | Nucleoside-binding outer membrane protein                                                       | M  | Cell wall/membrane/envelope biogenesis                       |
| fam2_ob | VC 2307  | No duplication | HGT | COG1893 | Ketopantoate reductase                                                                          | H  | Coenzyme transport and metabolism                            |
| fam2_oz | VC 2309  | No duplication | HGT | COG0520 | Selenocysteine lyase                                                                            | E  | Amino acid transport and metabolism                          |
| fam2_nz | VC 2310  | No duplication | HGT | COG2166 | SufE protein probably involved in Fe-S center assembly                                          | R  | General function prediction only                             |
| fam2_ny | VC 2311  | No duplication | HGT | COG1179 | Dinucleotide-utilizing enzymes involved in molybdopterin and thiamine biosynthesis family 1     | H  | Coenzyme transport and metabolism                            |
| fam2_nw | VC 2314  | No duplication | No  | No hit  |                                                                                                 |    |                                                              |
| fam1_gr | VC 2316* | Duplication    | HGT | COG0548 | Acetylglutamate kinase                                                                          | E  | Amino acid transport and metabolism                          |
| fam1_gr | VC 2316* | Duplication    | HGT | COG1246 | N-acetylglutamate synthase and related acetyltransferases                                       | E  | Amino acid transport and metabolism                          |
| fam2_nv | VC 2319  | No duplication | HGT | COG0507 | ATP-dependent exoDNAse (exonuclease V), alpha subunit - helicase superfamily I member           | L  | Replication, recombination and repair                        |
| fam1_jy | VC 2320  | Duplication    | HGT | COG1074 | ATP-dependent exoDNAse (exonuclease V) beta subunit (contains helicase and exonuclease domains) | L  | Replication, recombination and repair                        |
| fam1_gq | VC 2322  | Duplication    | HGT | COG1330 | Exonuclease V gamma subunit                                                                     | L  | Replication, recombination and repair                        |
| fam2_nu | VC 2323  | No duplication | HGT | COG1275 | Tellurite resistance protein and related permeases                                              | P  | Inorganic ion transport and metabolism                       |
| fam2_nt | VC 2324  | No duplication | HGT | COG0583 | Transcriptional regulator                                                                       | K  | Transcription                                                |
| fam2_ns | VC 2326  | No duplication | HGT | COG3141 | Uncharacterized protein conserved in bacteria                                                   | S  | Function unknown                                             |
| fam2_nq | VC 2329  | No duplication | HGT | COG2171 | Tetrahydrodipicolinate N-succinyltransferase                                                    | E  | Amino acid transport and metabolism                          |
| fam1_gp | VC 2330  | Duplication    | HGT | COG3213 | Uncharacterized protein involved in response to NO                                              | P  | Inorganic ion transport and metabolism                       |
| fam2_np | VC 2332  | No duplication | HGT | COG0456 | Acetyltransferases                                                                              | R  | General function prediction only                             |
| fam2_no | VC 2333  | No duplication | HGT | COG0189 | Glutathione synthase/Ribosomal protein S6 modification enzyme (glutaminyl transferase)          | HJ | Multiple classes                                             |
| fam2_nn | VC 2334  | No duplication | HGT | COG0598 | Mg <sup>2+</sup> and Co <sup>2+</sup> transporters                                              | P  | Inorganic ion transport and metabolism                       |
| fam2_nm | VC 2335  | No duplication | HGT | No hit  |                                                                                                 |    |                                                              |
| fam2_nl | VC 2336  | No duplication | HGT | COG0073 | EMAP domain                                                                                     | R  | General function prediction only                             |
| fam2_nk | VC 2337  | No duplication | HGT | COG1609 | Transcriptional regulators                                                                      | K  | Transcription                                                |
| fam2_ni | VC 2339  | No duplication | No  | COG2059 | Chromate transport protein ChrA                                                                 | P  | Inorganic ion transport and metabolism                       |
| fam2_ng | VC 2340  | No duplication | No  | COG2206 | HD-GYP domain                                                                                   | T  | Signal transduction mechanisms                               |
| fam2_nf | VC 2341  | No duplication | No  | COG1022 | Long-chain acyl-CoA synthetases (AMP-forming)                                                   | I  | Lipid transport and metabolism                               |
| fam1_av | VC 2342  | Duplication    | HGT | COG0480 | Translation elongation factors (GTPases)                                                        | J  | Translation, ribosomal structure and biogenesis              |
| fam1_go | VC 2344  | Duplication    | No  | No hit  |                                                                                                 |    |                                                              |
| fam2_ne | VC 2345  | No duplication | No  | COG0560 | Phosphoserine phosphatase                                                                       | E  | Amino acid transport and metabolism                          |
| fam2_nd | VC 2347  | No duplication | HGT | COG0813 | Purine-nucleoside phosphorylase                                                                 | F  | Nucleotide transport and metabolism                          |
| fam2_nc | VC 2348  | No duplication | HGT | COG1015 | Phosphopentomutase                                                                              | G  | Carbohydrate transport and metabolism                        |
| fam2_nb | VC 2349  | No duplication | HGT | COG0213 | Thymidine phosphorylase                                                                         | F  | Nucleotide transport and metabolism                          |

Orata et al. Genetic Interactions Between *V. metoecus* and *V. cholerae*

|         |          |                |     |         |                                                                                                                      |     |                                                               |
|---------|----------|----------------|-----|---------|----------------------------------------------------------------------------------------------------------------------|-----|---------------------------------------------------------------|
| fam2_na | VC 2350  | No duplication | HGT | COG0274 | Deoxyribose-phosphate aldolase                                                                                       | F   | Nucleotide transport and metabolism                           |
| fam2_mz | VC 2352  | No duplication | No  | COG1972 | Nucleoside permease                                                                                                  | F   | Nucleotide transport and metabolism                           |
| fam2_mx | VC 2357  | No duplication | No  | No hit  |                                                                                                                      |     |                                                               |
| fam2_mw | VC 2358  | No duplication | No  | COG3945 | Uncharacterized conserved protein                                                                                    | S   | Function unknown                                              |
| fam2_mu | VC 2360  | No duplication | HGT | COG0648 | Endonuclease IV                                                                                                      | L   | Replication, recombination and repair                         |
| fam2_mt | VC 2363  | No duplication | HGT | COG0083 | Homoserine kinase                                                                                                    | E   | Amino acid transport and metabolism                           |
| fam1_gn | VC 2364* | Duplication    | HGT | COG0527 | Aspartokinases                                                                                                       | E   | Amino acid transport and metabolism                           |
| fam1_gn | VC 2364* | Duplication    | HGT | COG0460 | Homoserine dehydrogenase                                                                                             | E   | Amino acid transport and metabolism                           |
| fam2_ms | VC 2368  | No duplication | No  | COG0745 | Response regulators consisting of a CheY-like receiver domain and a winged-helix DNA-binding domain                  | TK  | Multiple classes                                              |
| fam1_lx | VC 2369* | Duplication    | No  | COG0642 | Signal transduction histidine kinase                                                                                 | T   | Signal transduction mechanisms                                |
| fam1_lx | VC 2369* | Duplication    | No  | COG2198 | FOG: HPT domain                                                                                                      | T   | Signal transduction mechanisms                                |
| fam1_lx | VC 2369* | Duplication    | No  | COG0784 | FOG: CheY-like receiver                                                                                              | T   | Signal transduction mechanisms                                |
| fam1_lx | VC 2369* | Duplication    | No  | COG2202 | FOG: PAS/PAC domain                                                                                                  | T   | Signal transduction mechanisms                                |
| fam2_mr | VC 2370  | No duplication | No  | COG3706 | Response regulator containing a CheY-like receiver domain and a GGDEF domain                                         | T   | Signal transduction mechanisms                                |
| fam1_gl | VC 2371  | Duplication    | No  | COG1242 | Predicted Fe-S oxidoreductase                                                                                        | R   | General function prediction only                              |
| fam1_ag | VC 2373* | Duplication    | HGT | COG0069 | Glutamate synthase domain 2                                                                                          | E   | Amino acid transport and metabolism                           |
| fam1_ag | VC 2373* | Duplication    | HGT | COG0067 | Glutamate synthase domain 1                                                                                          | E   | Amino acid transport and metabolism                           |
| fam1_ag | VC 2373* | Duplication    | HGT | COG0070 | Glutamate synthase domain 3                                                                                          | E   | Amino acid transport and metabolism                           |
| fam2_mq | VC 2374  | No duplication | No  | COG0493 | NADPH-dependent glutamate synthase beta chain and related oxidoreductases                                            | ER  | Multiple classes                                              |
| fam1_ag | VC 2376* | Duplication    | HGT | COG0069 | Glutamate synthase domain 2                                                                                          | E   | Amino acid transport and metabolism                           |
| fam1_ag | VC 2376* | Duplication    | HGT | COG0067 | Glutamate synthase domain 1                                                                                          | E   | Amino acid transport and metabolism                           |
| fam1_ag | VC 2376* | Duplication    | HGT | COG0070 | Glutamate synthase domain 3                                                                                          | E   | Amino acid transport and metabolism                           |
| fam2_mp | VC 2377  | No duplication | No  | COG0493 | NADPH-dependent glutamate synthase beta chain and related oxidoreductases                                            | ER  | Multiple classes                                              |
| fam2_mo | VC 2378  | No duplication | No  | COG4446 | Uncharacterized protein conserved in bacteria                                                                        | S   | Function unknown                                              |
| fam2_mn | VC 2379  | No duplication | No  | COG0775 | Nucleoside phosphorylase                                                                                             | F   | Nucleotide transport and metabolism                           |
| fam2_mm | VC 2380  | No duplication | No  | COG1270 | Cobalamin biosynthesis protein CobD/CbiB                                                                             | H   | Coenzyme transport and metabolism                             |
| fam2_ml | VC 2381  | No duplication | No  | COG0614 | ABC-type Fe3+-hydroxamate transport system, periplasmic component                                                    | P   | Inorganic ion transport and metabolism                        |
| fam2_mk | VC 2382  | No duplication | No  | COG2860 | Predicted membrane protein                                                                                           | S   | Function unknown                                              |
| fam2_mj | VC 2384  | No duplication | No  | COG0730 | Predicted permeases                                                                                                  | R   | General function prediction only                              |
| fam2_mi | VC 2389* | No duplication | HGT | COG0458 | Carbamoylphosphate synthase large subunit (split gene in MJ)                                                         | EF  | Multiple classes                                              |
| fam2_mi | VC 2389* | No duplication | HGT | COG0439 | Biotin carboxylase                                                                                                   | I   | Lipid transport and metabolism                                |
| fam2_mi | VC 2389* | No duplication | HGT | COG0138 | AICAR transformylase/IMP cyclohydrolase PurH (only IMP cyclohydrolase domain in AfuI)                                | F   | Nucleotide transport and metabolism                           |
| fam2_mh | VC 2391  | No duplication | HGT | COG0289 | Dihydrodipicolinate reductase                                                                                        | E   | Amino acid transport and metabolism                           |
| fam2_mg | VC 2392  | No duplication | No  | COG1051 | ADP-ribose pyrophosphatase                                                                                           | F   | Nucleotide transport and metabolism                           |
| fam1_lw | VC 2394  | Duplication    | No  | COG0653 | Preprotein translocase subunit SecA (ATPase, RNA helicase)                                                           | U   | Intracellular trafficking, secretion, and vesicular transport |
| fam2_mf | VC 2395  | No duplication | HGT | COG4701 | Uncharacterized protein conserved in bacteria                                                                        | S   | Function unknown                                              |
| fam2_me | VC 2396  | No duplication | HGT | COG0774 | UDP-3-O-acyl-N-acetylglucosamine deacetylase                                                                         | M   | Cell wall/membrane/envelope biogenesis                        |
| fam2_md | VC 2398  | No duplication | No  | COG0849 | Actin-like ATPase involved in cell division                                                                          | D   | Cell cycle control, cell division, chromosome partitioning    |
| fam2_mc | VC 2399  | No duplication | No  | COG1589 | Cell division septal protein                                                                                         | M   | Cell wall/membrane/envelope biogenesis                        |
| fam1_lv | VC 2400  | Duplication    | No  | COG0773 | UDP-N-acetylmuramate-alanine ligase                                                                                  | M   | Cell wall/membrane/envelope biogenesis                        |
| fam2_mb | VC 2401  | No duplication | No  | COG0707 | UDP-N-acetylglucosamine:LPS N-acetylglucosamine transferase                                                          | M   | Cell wall/membrane/envelope biogenesis                        |
| fam2_ma | VC 2403  | No duplication | No  | COG0771 | UDP-N-acetylmuramoylalanine-D-glutamate ligase                                                                       | M   | Cell wall/membrane/envelope biogenesis                        |
| fam2_lz | VC 2404  | No duplication | HGT | COG0472 | UDP-N-acetylmuramyl pentapeptide phosphotransferase/UDP-N-acetylglucosamine-1-phosphate transferase                  | M   | Cell wall/membrane/envelope biogenesis                        |
| fam2_ly | VC 2405  | No duplication | HGT | COG0770 | UDP-N-acetylmuramyl pentapeptide synthase                                                                            | M   | Cell wall/membrane/envelope biogenesis                        |
| fam2_lx | VC 2406  | No duplication | HGT | COG0769 | UDP-N-acetylmuramyl tripeptide synthase                                                                              | M   | Cell wall/membrane/envelope biogenesis                        |
| fam2_lw | VC 2407  | No duplication | HGT | COG0768 | Cell division protein FtsI/penicillin-binding protein 2                                                              | M   | Cell wall/membrane/envelope biogenesis                        |
| fam2_lv | VC 2408  | No duplication | HGT | COG3116 | Cell division protein                                                                                                | D   | Cell cycle control, cell division, chromosome partitioning    |
| fam2_lu | VC 2409  | No duplication | HGT | COG0275 | Predicted S-adenosylmethionine-dependent methyltransferase involved in cell envelope biogenesis                      | M   | Cell wall/membrane/envelope biogenesis                        |
| fam2_lt | VC 2412  | No duplication | HGT | COG1249 | Pyruvate/2-oxoglutarate dehydrogenase complex, dihydroliipoamide dehydrogenase (E3) component, and related enzymes   | C   | Energy production and conversion                              |
| fam2_ls | VC 2413* | No duplication | HGT | COG0508 | Pyruvate/2-oxoglutarate dehydrogenase complex, dihydroliipoamide acyltransferase (E2) component, and related enzymes | C   | Energy production and conversion                              |
| fam2_ls | VC 2413* | No duplication | HGT | COG0511 | Biotin carboxyl carrier protein                                                                                      | I   | Lipid transport and metabolism                                |
| fam2_lr | VC 2414  | No duplication | HGT | COG2609 | Pyruvate dehydrogenase complex, dehydrogenase (E1) component                                                         | C   | Energy production and conversion                              |
| fam2_lq | VC 2415  | No duplication | No  | COG2186 | Transcriptional regulators                                                                                           | K   | Transcription                                                 |
| fam2_lp | VC 2418  | No duplication | No  | COG1651 | Protein-disulfide isomerase                                                                                          | O   | Posttranslational modification, protein turnover, chaperones  |
| fam2_lo | VC 2419  | No duplication | No  | COG4974 | Site-specific recombinase XerD                                                                                       | L   | Replication, recombination and repair                         |
| fam2_ln | VC 2420  | No duplication | No  | COG0716 | Flavodoxins                                                                                                          | C   | Energy production and conversion                              |
| fam5_cs | VC 2422  | No duplication | HGT | COG0157 | Nicotinate-nucleotide pyrophosphorylase                                                                              | H   | Coenzyme transport and metabolism                             |
| fam5_cu | VC 2424  | No duplication | No  | COG2804 | Type II secretory pathway, ATPase PulE/Tfp pilus assembly pathway, ATPase PilB                                       | NU  | Multiple classes                                              |
| fam1_rs | VC 2425  | No duplication | No  | COG1459 | Type II secretory pathway, component PulF                                                                            | NU  | Multiple classes                                              |
| fam1_sc | VC 2426  | No duplication | HGT | COG1989 | Type II secretory pathway, prepilin signal peptidase PulO and related peptidases                                     | NOU | Multiple classes                                              |
| fam1_sj | VC 2427  | No duplication | HGT | COG0237 | Dephospho-CoA kinase                                                                                                 | H   | Coenzyme transport and metabolism                             |
| fam1_fx | VC 2438  | Duplication    | No  | COG1391 | Glutamine synthetase adenylyltransferase                                                                             | OT  | Multiple classes                                              |
| fam2_bk | VC 2440  | No duplication | No  | COG3025 | Uncharacterized conserved protein                                                                                    | S   | Function unknown                                              |
| fam2_br | VC 2441  | No duplication | No  | COG1392 | Phosphate transport regulator (distant homolog of PhoU)                                                              | P   | Inorganic ion transport and metabolism                        |
| fam2_ej | VC 2452  | No duplication | No  | COG2265 | SAM-dependent methyltransferases related to tRNA (uracil-5-)-methyltransferase                                       | J   | Translation, ribosomal structure and biogenesis               |
| fam2_eq | VC 2453* | No duplication | No  | COG4999 | Uncharacterized domain of BarA-like signal transduction histidine kinases                                            | T   | Signal transduction mechanisms                                |
| fam2_eq | VC 2453* | No duplication | No  | COG0642 | Signal transduction histidine kinase                                                                                 | T   | Signal transduction mechanisms                                |
| fam2_eq | VC 2453* | No duplication | No  | COG0784 | FOG: CheY-like receiver                                                                                              | T   | Signal transduction mechanisms                                |

Orata et al. Genetic Interactions Between *V. metoecus* and *V. cholerae*

|         |          |                |     |         |                                                                                             |     |                                                               |
|---------|----------|----------------|-----|---------|---------------------------------------------------------------------------------------------|-----|---------------------------------------------------------------|
| fam2_eq | VC_2453* | No duplication | No  | COG2198 | FOG: HPT domain                                                                             | T   | Signal transduction mechanisms                                |
| fam1_ld | VC_2454  | Duplication    | No  | COG2199 | FOG: GGDEF domain                                                                           | T   | Signal transduction mechanisms                                |
| fam2_fe | VC_2455  | No duplication | No  | No hit  |                                                                                             |     |                                                               |
| fam1_di | VC_2456  | Duplication    | No  | No hit  |                                                                                             |     |                                                               |
| fam2_fn | VC_2457  | No duplication | No  | COG0736 | Phosphopantetheinyl transferase (holo-ACP synthase)                                         | I   | Lipid transport and metabolism                                |
| fam2_fp | VC_2458  | No duplication | No  | COG0854 | Pyridoxal phosphate biosynthesis protein                                                    | H   | Coenzyme transport and metabolism                             |
| fam2_fq | VC_2459  | No duplication | HGT | COG1381 | Recombinational DNA repair protein (RecF pathway)                                           | L   | Replication, recombination and repair                         |
| fam2_fr | VC_2460  | No duplication | HGT | COG1159 | GTPase                                                                                      | R   | General function prediction only                              |
| fam2_fs | VC_2461  | No duplication | HGT | COG0571 | dsRNA-specific ribonuclease                                                                 | K   | Transcription                                                 |
| fam2_ft | VC_2462  | No duplication | No  | COG0681 | Signal peptidase I                                                                          | U   | Intracellular trafficking, secretion, and vesicular transport |
| fam1_gc | VC_2463  | Duplication    | No  | COG0481 | Membrane GTPase LepA                                                                        | M   | Cell wall/membrane/envelope biogenesis                        |
| fam2_fu | VC_2464  | No duplication | No  | COG3086 | Positive regulator of sigma E activity                                                      | T   | Signal transduction mechanisms                                |
| fam2_ga | VC_2465  | No duplication | No  | COG3026 | Negative regulator of sigma E activity                                                      | T   | Signal transduction mechanisms                                |
| fam2_gc | VC_2466  | No duplication | No  | COG3073 | Negative regulator of sigma E activity                                                      | T   | Signal transduction mechanisms                                |
| fam2_hs | VC_2475  | No duplication | No  | COG0654 | 2-polyprenyl-6-methoxyphenol hydroxylase and related FAD-dependent oxidoreductases          | HC  | Multiple classes                                              |
| fam2_ih | VC_2479  | No duplication | No  | COG0212 | 5-formyltetrahydrofolate cyclo-ligase                                                       | H   | Coenzyme transport and metabolism                             |
| fam2_ip | VC_2480  | No duplication | No  | COG0120 | Ribose 5-phosphate isomerase                                                                | G   | Carbohydrate transport and metabolism                         |
| fam2_is | VC_2481  | No duplication | No  | COG0111 | Phosphoglycerate dehydrogenase and related dehydrogenases                                   | HE  | Multiple classes                                              |
| fam2_it | VC_2482  | No duplication | No  | COG0440 | Acetolactate synthase, small (regulatory) subunit                                           | E   | Amino acid transport and metabolism                           |
| fam2_iu | VC_2483  | No duplication | No  | COG0028 | Thiamine pyrophosphate-requiring enzymes                                                    | EH  | Multiple classes                                              |
| fam2_iv | VC_2484  | No duplication | No  | COG1022 | Long-chain acyl-CoA synthetases (AMP-forming)                                               | I   | Lipid transport and metabolism                                |
| fam2_iw | VC_2485  | No duplication | No  | COG0583 | Transcriptional regulator                                                                   | K   | Transcription                                                 |
| fam2_iy | VC_2487  | No duplication | No  | COG1819 | Glycosyl transferases, related to UDP-glucuronosyltransferase                               | GC  | Multiple classes                                              |
| fam2_iz | VC_2488  | No duplication | No  | COG0671 | Membrane-associated phospholipid phosphatase                                                | I   | Lipid transport and metabolism                                |
| fam2_jj | VC_2490  | No duplication | No  | COG0119 | Isopropylmalate/homocitrate/citramalate synthases                                           | E   | Amino acid transport and metabolism                           |
| fam2_jp | VC_2491  | No duplication | No  | COG0473 | Isocitrate/isopropylmalate dehydrogenase                                                    | CE  | Multiple classes                                              |
| fam2_ju | VC_2492  | No duplication | HGT | COG0065 | 3-isopropylmalate dehydratase large subunit                                                 | E   | Amino acid transport and metabolism                           |
| fam2_jy | VC_2493  | No duplication | HGT | COG0066 | 3-isopropylmalate dehydratase small subunit                                                 | E   | Amino acid transport and metabolism                           |
| fam2_kb | VC_2494  | No duplication | HGT | No hit  |                                                                                             |     |                                                               |
| fam5_ac | VC_2501  | No duplication | HGT | COG0260 | Leucyl aminopeptidase                                                                       | E   | Amino acid transport and metabolism                           |
| fam1_qo | VC_2504  | Duplication    | HGT | COG1052 | Lactate dehydrogenase and related dehydrogenases                                            | CHR | Multiple classes                                              |
| fam5_aa | VC_2505  | No duplication | HGT | COG0564 | Pseudouridylyl synthases, 23S RNA-specific                                                  | J   | Translation, ribosomal structure and biogenesis               |
| fam1_ix | VC_2506  | Duplication    | HGT | COG0553 | Superfamily II DNA/RNA helicases, SNF2 family                                               | KL  | Multiple classes                                              |
| fam4_tf | VC_2507  | No duplication | HGT | COG1875 | Predicted ATPase related to phosphate starvation-inducible protein PhoH                     | T   | Signal transduction mechanisms                                |
| fam4_te | VC_2508  | No duplication | HGT | COG0078 | Ornithine carbamoyltransferase                                                              | E   | Amino acid transport and metabolism                           |
| fam4_td | VC_2510  | No duplication | HGT | COG0540 | Aspartate carbamoyltransferase, catalytic chain                                             | F   | Nucleotide transport and metabolism                           |
| fam4_tc | VC_2511  | No duplication | HGT | COG1781 | Aspartate carbamoyltransferase, regulatory subunit                                          | F   | Nucleotide transport and metabolism                           |
| fam4_tb | VC_2512  | No duplication | HGT | COG0251 | Putative translation initiation inhibitor, yjgF family                                      | J   | Translation, ribosomal structure and biogenesis               |
| fam4_ta | VC_2513  | No duplication | HGT | COG0204 | 1-acyl-sn-glycerol-3-phosphate acyltransferase                                              | I   | Lipid transport and metabolism                                |
| fam4_sz | VC_2514  | No duplication | HGT | COG0766 | UDP-N-acetylglucosamine enolpyruvyl transferase                                             | M   | Cell wall/membrane/envelope biogenesis                        |
| fam4_sy | VC_2515  | No duplication | HGT | COG5007 | Predicted transcriptional regulator, BoIA superfamily                                       | K   | Transcription                                                 |
| fam4_sx | VC_2516  | No duplication | HGT | COG3113 | Predicted NTP binding protein (contains STAS domain)                                        | R   | General function prediction only                              |
| fam4_sw | VC_2517  | No duplication | HGT | COG2854 | ABC-type transport system involved in resistance to organic solvents, auxiliary component   | Q   | Secondary metabolites biosynthesis, transport and catabolism  |
| fam4_sv | VC_2518  | No duplication | HGT | COG1463 | ABC-type transport system involved in resistance to organic solvents, periplasmic component | Q   | Secondary metabolites biosynthesis, transport and catabolism  |
| fam4_su | VC_2519  | No duplication | HGT | COG0767 | ABC-type transport system involved in resistance to organic solvents, permease component    | Q   | Secondary metabolites biosynthesis, transport and catabolism  |
| fam4_st | VC_2520  | No duplication | HGT | COG1127 | ABC-type transport system involved in resistance to organic solvents, ATPase component      | Q   | Secondary metabolites biosynthesis, transport and catabolism  |
| fam4_ss | VC_2522  | No duplication | No  | COG0530 | Ca2+/Na+ antiporter                                                                         | P   | Inorganic ion transport and metabolism                        |
| fam4_sr | VC_2523* | No duplication | No  | COG0794 | Predicted sugar phosphate isomerase involved in capsule formation                           | M   | Cell wall/membrane/envelope biogenesis                        |
| fam4_sr | VC_2523* | No duplication | No  | COG2905 | Predicted signal-transduction protein containing cAMP-binding and CBS domains               | T   | Signal transduction mechanisms                                |
| fam4_sq | VC_2524  | No duplication | No  | COG1778 | Low specificity phosphatase (HAD superfamily)                                               | R   | General function prediction only                              |
| fam4_sp | VC_2525  | No duplication | No  | COG3117 | Uncharacterized protein conserved in bacteria                                               | S   | Function unknown                                              |
| fam4_so | VC_2527  | No duplication | No  | COG1934 | Uncharacterized protein conserved in bacteria                                               | S   | Function unknown                                              |
| fam4_sn | VC_2528  | No duplication | No  | COG1137 | ABC-type (unclassified) transport system, ATPase component                                  | R   | General function prediction only                              |
| fam1_dz | VC_2529  | Duplication    | No  | COG1508 | DNA-directed RNA polymerase specialized sigma subunit, sigma54 homolog                      | K   | Transcription                                                 |
| fam1_jl | VC_2530  | Duplication    | No  | COG1544 | Ribosome-associated protein Y (PSrp-1)                                                      | J   | Translation, ribosomal structure and biogenesis               |
| fam4_sm | VC_2531  | No duplication | No  | COG1762 | Phosphotransferase system mannitol/fructose-specific IIA domain (Ntr-type)                  | GT  | Multiple classes                                              |
| fam1_iw | VC_2532  | Duplication    | No  | COG1660 | Predicted P-loop-containing kinase                                                          | R   | General function prediction only                              |
| fam4_sl | VC_2534  | No duplication | HGT | COG2239 | Mg/Co/Ni transporter MgtE (contains CBS domain)                                             | P   | Inorganic ion transport and metabolism                        |
| fam4_sk | VC_2535  | No duplication | HGT | COG0312 | Predicted Zn-dependent proteases and their inactivated homologs                             | R   | General function prediction only                              |
| fam4_sj | VC_2536  | No duplication | HGT | COG3028 | Uncharacterized protein conserved in bacteria                                               | S   | Function unknown                                              |
| fam4_si | VC_2537  | No duplication | HGT | COG3840 | ABC-type thiamine transport system, ATPase component                                        | H   | Coenzyme transport and metabolism                             |
| fam4_sh | VC_2538  | No duplication | HGT | COG1178 | ABC-type Fe3+ transport system, permease component                                          | P   | Inorganic ion transport and metabolism                        |
| fam4_sg | VC_2539  | No duplication | HGT | COG4143 | ABC-type thiamine transport system, periplasmic component                                   | H   | Coenzyme transport and metabolism                             |
| fam4_sf | VC_2541  | No duplication | HGT | COG0163 | 3-polyprenyl-4-hydroxybenzoate decarboxylase                                                | H   | Coenzyme transport and metabolism                             |
| fam4_se | VC_2542  | No duplication | HGT | COG0773 | UDP-N-acetylmuramate-alanine ligase                                                         | M   | Cell wall/membrane/envelope biogenesis                        |
| fam4_sd | VC_2544  | No duplication | No  | COG0158 | Fructose-1,6-bisphosphatase                                                                 | G   | Carbohydrate transport and metabolism                         |
| fam4_sc | VC_2545  | No duplication | HGT | COG0221 | Inorganic pyrophosphatase                                                                   | C   | Energy production and conversion                              |
| fam4_sb | VC_2546  | No duplication | HGT | COG2105 | Uncharacterized conserved protein                                                           | S   | Function unknown                                              |

Orata et al. Genetic Interactions Between *V. metoecus* and *V. cholerae*

|         |          |                |     |         |                                                                                                                    |     |                                                               |
|---------|----------|----------------|-----|---------|--------------------------------------------------------------------------------------------------------------------|-----|---------------------------------------------------------------|
| fam1_iv | VC 2547  | Duplication    | No  | COG2911 | Uncharacterized protein conserved in bacteria                                                                      | S   | Function unknown                                              |
| fam1_qm | VC 2548  | Duplication    | No  | COG0729 | Outer membrane protein                                                                                             | M   | Cell wall/membrane/envelope biogenesis                        |
| fam4_sa | VC 2549  | No duplication | No  | COG0225 | Peptide methionine sulfoxide reductase                                                                             | O   | Posttranslational modification, protein turnover, chaperones  |
| fam4_rz | VC 2550  | No duplication | No  | COG3054 | Predicted transcriptional regulator                                                                                | R   | General function prediction only                              |
| fam4_ry | VC 2551  | No duplication | No  | No hit  |                                                                                                                    |     |                                                               |
| fam4_rx | VC 2552  | No duplication | No  | No hit  |                                                                                                                    |     |                                                               |
| fam4_rv | VC 2553  | No duplication | No  | COG1136 | ABC-type antimicrobial peptide transport system, ATPase component                                                  | V   | Defense mechanisms                                            |
| fam4_rv | VC 2554  | No duplication | No  | COG4591 | ABC-type transport system, involved in lipoprotein release, permease component                                     | M   | Cell wall/membrane/envelope biogenesis                        |
| fam4_ru | VC 2555  | No duplication | No  | COG3495 | Uncharacterized protein conserved in bacteria                                                                      | S   | Function unknown                                              |
| fam1_ql | VC 2556  | Duplication    | No  | No hit  |                                                                                                                    |     |                                                               |
| fam1_ql | VC 2557  | Duplication    | No  | No hit  |                                                                                                                    |     |                                                               |
| fam4_rt | VC 2558  | No duplication | No  | COG0529 | Adenylylsulfate kinase and related kinases                                                                         | P   | Inorganic ion transport and metabolism                        |
| fam4_rs | VC 2559  | No duplication | No  | COG2895 | GTPases - Sulfate adenylyl transferase subunit 1                                                                   | P   | Inorganic ion transport and metabolism                        |
| fam4_rr | VC 2560  | No duplication | No  | COG0175 | 3'-phosphoadenosine 5'-phosphosulfate sulfotransferase (PAPS reductase)/FAD synthetase and related enzymes         | EH  | Multiple classes                                              |
| fam4_rq | VC 2561  | No duplication | No  | COG0007 | Uroporphyrinogen-III methylase                                                                                     | H   | Coenzyme transport and metabolism                             |
| fam4_rp | VC 2562  | No duplication | No  | COG0737 | 5'-nucleotidase/2',3'-cyclic phosphodiesterase and related esterases                                               | F   | Nucleotide transport and metabolism                           |
| fam4_ro | VC 2563  | No duplication | No  | COG0664 | cAMP-binding proteins - catabolite gene activator and regulatory subunit of cAMP-dependent protein kinases         | T   | Signal transduction mechanisms                                |
| fam4_rm | VC 2564  | No duplication | No  | COG0513 | Superfamily II DNA and RNA helicases                                                                               | LKJ | Multiple classes                                              |
| fam4_rm | VC 2565  | No duplication | No  | COG2153 | Predicted acyltransferase                                                                                          | R   | General function prediction only                              |
| fam1_bi | VC 2599  | Duplication    | HGT | COG0557 | Exoribonuclease R                                                                                                  | K   | Transcription                                                 |
| fam4_ri | VC 2603  | No duplication | No  | COG1446 | Asparaginase                                                                                                       | E   | Amino acid transport and metabolism                           |
| fam1_qj | VC 2604  | Duplication    | No  | COG1047 | FKBP-type peptidyl-prolyl cis-trans isomerases 2                                                                   | O   | Posttranslational modification, protein turnover, chaperones  |
| fam1_qi | VC 2606* | Duplication    | No  | COG0475 | Kef-type K+ transport systems, membrane components                                                                 | P   | Inorganic ion transport and metabolism                        |
| fam1_qi | VC 2606* | Duplication    | No  | COG0569 | K+ transport systems, NAD-binding component                                                                        | P   | Inorganic ion transport and metabolism                        |
| fam4_rh | VC 2608  | No duplication | HGT | COG0488 | ATPase components of ABC transporters with duplicated ATPase domains                                               | R   | General function prediction only                              |
| fam4_rg | VC 2609  | No duplication | No  | COG5589 | Uncharacterized conserved protein                                                                                  | S   | Function unknown                                              |
| fam4_rf | VC 2610  | No duplication | HGT | COG0429 | Predicted hydrolase of the alpha/beta-hydrolase fold                                                               | R   | General function prediction only                              |
| fam4_re | VC 2612  | No duplication | HGT | COG3089 | Uncharacterized protein conserved in bacteria                                                                      | S   | Function unknown                                              |
| fam4_rc | VC 2614  | No duplication | HGT | COG0664 | cAMP-binding proteins - catabolite gene activator and regulatory subunit of cAMP-dependent protein kinases         | T   | Signal transduction mechanisms                                |
| fam4_rb | VC 2615  | No duplication | No  | No hit  |                                                                                                                    |     |                                                               |
| fam4_ra | VC 2616  | No duplication | HGT | COG1012 | NAD-dependent aldehyde dehydrogenases                                                                              | C   | Energy production and conversion                              |
| fam4_qz | VC 2617  | No duplication | No  | COG3138 | Arginine/ornithine N-succinyltransferase beta subunit                                                              | E   | Amino acid transport and metabolism                           |
| fam4_qy | VC 2618  | No duplication | No  | COG4992 | Ornithine/acetylornithine aminotransferase                                                                         | E   | Amino acid transport and metabolism                           |
| fam4_qx | VC 2619  | No duplication | No  | COG0512 | Anthranilate/para-aminobenzoate synthases component II                                                             | EH  | Multiple classes                                              |
| fam4_qw | VC 2620  | No duplication | No  | COG0621 | 2-methylthioadenine synthetase                                                                                     | J   | Translation, ribosomal structure and biogenesis               |
| fam4_qv | VC 2621  | No duplication | No  | COG2374 | Predicted extracellular nuclease                                                                                   | R   | General function prediction only                              |
| fam1_el | VC 2622  | Duplication    | No  | COG0834 | ABC-type amino acid transport/signal transduction systems, periplasmic component/domain                            | ET  | Multiple classes                                              |
| fam4_qt | VC 2623  | No duplication | No  | COG0180 | Tryptophanyl-tRNA synthetase                                                                                       | J   | Translation, ribosomal structure and biogenesis               |
| fam4_qs | VC 2624  | No duplication | No  | COG0546 | Predicted phosphatases                                                                                             | R   | General function prediction only                              |
| fam4_qr | VC 2625  | No duplication | No  | COG0036 | Pentose-5-phosphate-3-epimerase                                                                                    | G   | Carbohydrate transport and metabolism                         |
| fam1_iu | VC 2626  | Duplication    | No  | COG0338 | Site-specific DNA methylase                                                                                        | L   | Replication, recombination and repair                         |
| fam1_cr | VC 2627* | Duplication    | No  | COG3267 | Type II secretory pathway, component ExeA (predicted ATPase)                                                       | U   | Intracellular trafficking, secretion, and vesicular transport |
| fam1_cr | VC 2627* | Duplication    | No  | COG3266 | Uncharacterized protein conserved in bacteria                                                                      | S   | Function unknown                                              |
| fam4_qq | VC 2630  | No duplication | No  | COG4796 | Type II secretory pathway, component HofQ                                                                          | U   | Intracellular trafficking, secretion, and vesicular transport |
| fam4_qp | VC 2632  | No duplication | No  | COG3167 | Tfp pilus assembly protein PilO                                                                                    | NU  | Multiple classes                                              |
| fam4_qo | VC 2633  | No duplication | No  | COG3166 | Tfp pilus assembly protein PilN                                                                                    | NU  | Multiple classes                                              |
| fam1_cd | VC 2634  | Duplication    | No  | COG4972 | Tfp pilus assembly protein, ATPase PilM                                                                            | NU  | Multiple classes                                              |
| fam4_qn | VC 2635  | No duplication | No  | COG5009 | Membrane carboxypeptidase/penicillin-binding protein                                                               | M   | Cell wall/membrane/envelope biogenesis                        |
| fam4_qm | VC 2636  | No duplication | No  | COG0583 | Transcriptional regulator                                                                                          | K   | Transcription                                                 |
| fam4_ql | VC 2637* | No duplication | No  | COG0678 | Peroxioredoxin                                                                                                     | O   | Posttranslational modification, protein turnover, chaperones  |
| fam4_qi | VC 2637* | No duplication | No  | COG0695 | Glutaredoxin and related proteins                                                                                  | O   | Posttranslational modification, protein turnover, chaperones  |
| fam4_qk | VC 2638  | No duplication | HGT | COG1249 | Pyruvate/2-oxoglutarate dehydrogenase complex, dihydroliipoamide dehydrogenase (E3) component, and related enzymes | C   | Energy production and conversion                              |
| fam4_qj | VC 2640  | No duplication | HGT | No hit  |                                                                                                                    |     |                                                               |
| fam4_qi | VC 2641  | No duplication | HGT | COG0165 | Argininosuccinate lyase                                                                                            | E   | Amino acid transport and metabolism                           |
| fam4_qh | VC 2642  | No duplication | HGT | COG0137 | Argininosuccinate synthase                                                                                         | E   | Amino acid transport and metabolism                           |
| fam4_qg | VC 2644  | No duplication | HGT | COG0002 | Acetylglutamate semialdehyde dehydrogenase                                                                         | E   | Amino acid transport and metabolism                           |
| fam4_qf | VC 2645  | No duplication | HGT | COG0624 | Acetylornithine deacetylase/Succinyl-diaminopimelate desuccinylase and related deacylases                          | E   | Amino acid transport and metabolism                           |
| fam1_qh | VC 2646  | Duplication    | No  | COG2352 | Phosphoenolpyruvate carboxylase                                                                                    | C   | Energy production and conversion                              |
| fam4_qe | VC 2647  | No duplication | No  | COG1695 | Predicted transcriptional regulators                                                                               | K   | Transcription                                                 |
| fam4_qd | VC 2651  | No duplication | No  | COG0240 | Glycerol-3-phosphate dehydrogenase                                                                                 | C   | Energy production and conversion                              |
| fam4_qc | VC 2653  | No duplication | No  | COG1952 | Preprotein translocase subunit SecB                                                                                | U   | Intracellular trafficking, secretion, and vesicular transport |
| fam4_qb | VC 2654  | No duplication | No  | COG0607 | Rhodanese-related sulfurtransferase                                                                                | P   | Inorganic ion transport and metabolism                        |
| fam1_kj | VC 2655  | Duplication    | No  | COG2269 | Truncated, possibly inactive, Lysyl-tRNA synthetase (class II)                                                     | J   | Translation, ribosomal structure and biogenesis               |
| fam4_qa | VC 2657  | No duplication | No  | COG0479 | Succinate dehydrogenase/fumarate reductase, Fe-S protein subunit                                                   | C   | Energy production and conversion                              |
| fam4_pz | VC 2658  | No duplication | No  | COG3029 | Fumarate reductase subunit C                                                                                       | C   | Energy production and conversion                              |
| fam4_py | VC 2659  | No duplication | No  | COG3080 | Fumarate reductase subunit D                                                                                       | C   | Energy production and conversion                              |
| fam4_px | VC 2660  | No duplication | No  | COG0231 | Translation elongation factor P (EF-P)/translation initiation factor 5A (eIF-5A)                                   | J   | Translation, ribosomal structure and biogenesis               |
| fam4_pw | VC 2661  | No duplication | No  | COG1509 | Lysine 2,3-aminomutase                                                                                             | E   | Amino acid transport and metabolism                           |

Orata et al. Genetic Interactions Between *V. metoecus* and *V. cholerae*

|         |          |                |     |         |                                                                                                     |      |                                                               |
|---------|----------|----------------|-----|---------|-----------------------------------------------------------------------------------------------------|------|---------------------------------------------------------------|
| fam4_pv | VC_2662  | No duplication | HGT | No hit  |                                                                                                     |      |                                                               |
| fam1_bc | VC_2664  | Duplication    | HGT | COG0459 | Chaperonin GroEL (HSP60 family)                                                                     | O    | Posttranslational modification, protein turnover, chaperones  |
| fam4_pu | VC_2665  | No duplication | No  | COG0234 | Co-chaperonin GroES (HSP10)                                                                         | O    | Posttranslational modification, protein turnover, chaperones  |
| fam4_pt | VC_2666  | No duplication | No  | COG2345 | Predicted transcriptional regulator                                                                 | K    | Transcription                                                 |
| fam4_ps | VC_2667  | No duplication | No  | No hit  |                                                                                                     |      |                                                               |
| fam4_pr | VC_2668  | No duplication | No  | COG3152 | Predicted membrane protein                                                                          | S    | Function unknown                                              |
| fam4_pq | VC_2669  | No duplication | No  | COG3232 | 5-carboxymethyl-2-hydroxymuconate isomerase                                                         | E    | Amino acid transport and metabolism                           |
| fam4_pp | VC_2670  | No duplication | No  | COG0149 | Triosephosphate isomerase                                                                           | G    | Carbohydrate transport and metabolism                         |
| fam4_po | VC_2671  | No duplication | No  | COG0534 | Na <sup>+</sup> -driven multidrug efflux pump                                                       | V    | Defense mechanisms                                            |
| fam4_pn | VC_2672  | No duplication | No  | COG0684 | Demethylmenaquinone methyltransferase                                                               | H    | Coenzyme transport and metabolism                             |
| fam1_it | VC_2673  | Duplication    | No  | COG1575 | 1,4-dihydroxy-2-naphthoate octaprenyltransferase                                                    | H    | Coenzyme transport and metabolism                             |
| fam4_pm | VC_2674  | No duplication | No  | COG1220 | ATP-dependent protease HslIVU (ClpYQ), ATPase subunit                                               | O    | Posttranslational modification, protein turnover, chaperones  |
| fam4_pl | VC_2675  | No duplication | No  | COG5405 | ATP-dependent protease HslIVU (ClpYQ), peptidase subunit                                            | O    | Posttranslational modification, protein turnover, chaperones  |
| fam4_pk | VC_2676  | No duplication | No  | COG3087 | Cell division protein                                                                               | D    | Cell cycle control, cell division, chromosome partitioning    |
| fam1_qg | VC_2678  | Duplication    | No  | COG1198 | Primosomal protein N' (replication factor Y) - superfamily II helicase                              | L    | Replication, recombination and repair                         |
| fam4_pj | VC_2681  | No duplication | No  | COG0281 | Malic enzyme                                                                                        | C    | Energy production and conversion                              |
| fam4_pi | VC_2682  | No duplication | No  | COG3060 | Transcriptional regulator of met regulon                                                            | KE   | Multiple classes                                              |
| fam4_ph | VC_2683  | No duplication | HGT | COG0626 | Cystathionine beta-lyases/cystathionine gamma-synthases                                             | E    | Amino acid transport and metabolism                           |
| fam4_pf | VC_2685  | No duplication | No  | COG0685 | 5,10-methylenetetrahydrofolate reductase                                                            | E    | Amino acid transport and metabolism                           |
| fam4_pe | VC_2686  | No duplication | HGT | COG3074 | Uncharacterized protein conserved in bacteria                                                       | S    | Function unknown                                              |
| fam4_pd | VC_2688  | No duplication | No  | COG1494 | Fructose-1,6-bisphosphatase/sedoheptulose 1,7-bisphosphatase and related proteins                   | G    | Carbohydrate transport and metabolism                         |
| fam4_pc | VC_2689  | No duplication | No  | COG0205 | 6-phosphofructokinase                                                                               | G    | Carbohydrate transport and metabolism                         |
| fam4_pb | VC_2690  | No duplication | No  | COG0053 | Predicted Co/Zn/Cd cation transporters                                                              | P    | Inorganic ion transport and metabolism                        |
| fam4_pa | VC_2691  | No duplication | No  | COG3678 | P pilus assembly/Cpx signaling pathway, periplasmic inhibitor/zinc-resistance associated protein    | UNTP | Multiple classes                                              |
| fam4_oz | VC_2693  | No duplication | No  | COG0642 | Signal transduction histidine kinase                                                                | T    | Signal transduction mechanisms                                |
| fam4_oy | VC_2695  | No duplication | No  | COG0219 | Predicted rRNA methylase (SpoU class)                                                               | J    | Translation, ribosomal structure and biogenesis               |
| fam4_ox | VC_2696  | No duplication | No  | COG3030 | Protein affecting phage T7 exclusion by the F plasmid                                               | R    | General function prediction only                              |
| fam1_is | VC_2697  | Duplication    | HGT | COG2199 | FOG: GGDEF domain                                                                                   | T    | Signal transduction mechanisms                                |
| fam1_ir | VC_2698  | Duplication    | No  | COG1027 | Aspartate ammonia-lyase                                                                             | E    | Amino acid transport and metabolism                           |
| fam4_ow | VC_2699  | No duplication | No  | COG2704 | Anaerobic C4-dicarboxylate transporter                                                              | R    | General function prediction only                              |
| fam4_ov | VC_2701  | No duplication | No  | COG4232 | Thiol:disulfide interchange protein                                                                 | OC   | Multiple classes                                              |
| fam4_ou | VC_2702  | No duplication | HGT | COG2197 | Response regulator containing a CheY-like receiver domain and an HTH DNA-binding domain             | TK   | Multiple classes                                              |
| fam4_ot | VC_2704  | No duplication | No  | COG4327 | Predicted membrane protein                                                                          | S    | Function unknown                                              |
| fam4_os | VC_2705  | No duplication | No  | COG4147 | Predicted symporter                                                                                 | R    | General function prediction only                              |
| fam4_or | VC_2706  | No duplication | No  | COG1738 | Uncharacterized conserved protein                                                                   | S    | Function unknown                                              |
| fam4_oq | VC_2708  | No duplication | No  | COG0194 | Guanylate kinase                                                                                    | F    | Nucleotide transport and metabolism                           |
| fam4_op | VC_2709  | No duplication | No  | COG1758 | DNA-directed RNA polymerase, subunit K/omega                                                        | K    | Transcription                                                 |
| fam4_oo | VC_2710  | No duplication | No  | COG0317 | Guanosine polyphosphate pyrophosphohydrolases/synthetases                                           | TK   | Multiple classes                                              |
| fam4_on | VC_2711  | No duplication | HGT | COG1200 | RecG-like helicase                                                                                  | LK   | Multiple classes                                              |
| fam1_qf | VC_2712  | Duplication    | No  | COG2233 | Xanthine/uracil permeases                                                                           | F    | Nucleotide transport and metabolism                           |
| fam4_om | VC_2713  | No duplication | No  | COG0642 | Signal transduction histidine kinase                                                                | T    | Signal transduction mechanisms                                |
| fam4_ol | VC_2714  | No duplication | No  | COG0745 | Response regulators consisting of a CheY-like receiver domain and a winged-helix DNA-binding domain | TK   | Multiple classes                                              |
| fam4_ok | VC_2715  | No duplication | HGT | COG0782 | Transcription elongation factor                                                                     | K    | Transcription                                                 |
| fam1_je | VC_2716  | Duplication    | HGT | COG2183 | Transcriptional accessory protein                                                                   | K    | Transcription                                                 |
| fam4_oj | VC_2717  | No duplication | HGT | No hit  |                                                                                                     |      |                                                               |
| fam4_oi | VC_2718  | No duplication | HGT | COG0596 | Predicted hydrolases or acyltransferases (alpha/beta hydrolase superfamily)                         | R    | General function prediction only                              |
| fam4_oh | VC_2719  | No duplication | HGT | COG1040 | Predicted amidophosphoribosyltransferases                                                           | R    | General function prediction only                              |
| fam4_og | VC_2720* | No duplication | HGT | COG0316 | Uncharacterized conserved protein                                                                   | S    | Function unknown                                              |
| fam4_og | VC_2720* | No duplication | HGT | COG0694 | Thioredoxin-like proteins and domains                                                               | O    | Posttranslational modification, protein turnover, chaperones  |
| fam4_of | VC_2721  | No duplication | HGT | COG0494 | NTP pyrophosphohydrolases including oxidative damage repair enzymes                                 | LR   | Multiple classes                                              |
| fam4_oe | VC_2722  | No duplication | HGT | COG1218 | 3'-Phosphoadenosine 5'-phosphosulfate (PAPS) 3'-phosphatase                                         | P    | Inorganic ion transport and metabolism                        |
| fam4_od | VC_2723  | No duplication | HGT | No hit  |                                                                                                     |      |                                                               |
| fam4_ob | VC_2724  | No duplication | No  | COG3149 | Type II secretory pathway, component PuIM                                                           | U    | Intracellular trafficking, secretion, and vesicular transport |
| fam1_ck | VC_2725  | Duplication    | HGT | COG3297 | Type II secretory pathway, component PuIL                                                           | U    | Intracellular trafficking, secretion, and vesicular transport |
| fam1_ey | VC_2726  | Duplication    | No  | COG3156 | Type II secretory pathway, component PuIK                                                           | U    | Intracellular trafficking, secretion, and vesicular transport |
| fam1_cx | VC_2727  | Duplication    | No  | COG4795 | Type II secretory pathway, component PuIJ                                                           | U    | Intracellular trafficking, secretion, and vesicular transport |
| fam1_ez | VC_2728  | Duplication    | No  | COG2165 | Type II secretory pathway, pseudopilin PuIG                                                         | NU   | Multiple classes                                              |
| fam1_fa | VC_2729  | Duplication    | No  | COG2165 | Type II secretory pathway, pseudopilin PuIG                                                         | NU   | Multiple classes                                              |
| fam1_fb | VC_2730  | Duplication    | No  | COG2165 | Type II secretory pathway, pseudopilin PuIG                                                         | NU   | Multiple classes                                              |
| fam1_fc | VC_2731  | Duplication    | No  | COG1459 | Type II secretory pathway, component PuIF                                                           | NU   | Multiple classes                                              |
| fam1_oy | VC_2732  | Duplication    | No  | COG2804 | Type II secretory pathway, ATPase PuIE/Tfp pilus assembly pathway, ATPase PiiB                      | NU   | Multiple classes                                              |
| fam4_oa | VC_2734  | No duplication | No  | COG3031 | Type II secretory pathway, component PuIC                                                           | U    | Intracellular trafficking, secretion, and vesicular transport |
| fam4_nz | VC_2735  | No duplication | No  | COG1188 | Ribosome-associated heat shock protein implicated in the recycling of the 50S subunit (S4 paralog)  | J    | Translation, ribosomal structure and biogenesis               |
| fam4_ny | VC_2736  | No duplication | No  | COG1281 | Disulfide bond chaperones of the HSP33 family                                                       | O    | Posttranslational modification, protein turnover, chaperones  |
| fam1_qd | VC_2738  | Duplication    | No  | COG1866 | Phosphoenolpyruvate carboxykinase (ATP)                                                             | C    | Energy production and conversion                              |
| fam4_nx | VC_2739  | No duplication | No  | No hit  |                                                                                                     |      |                                                               |
| fam4_nw | VC_2740  | No duplication | No  | COG2153 | Predicted acyltransferase                                                                           | R    | General function prediction only                              |
| fam4_nv | VC_2742  | No duplication | No  | COG1295 | Predicted membrane protein                                                                          | S    | Function unknown                                              |

Orata et al. Genetic Interactions Between *V. metoecus* and *V. cholerae*

|         |           |                |     |         |                                                                                                                             |    |                                                              |
|---------|-----------|----------------|-----|---------|-----------------------------------------------------------------------------------------------------------------------------|----|--------------------------------------------------------------|
| fam4_nu | VC_2743   | No duplication | No  | COG3911 | Predicted ATPase                                                                                                            | R  | General function prediction only                             |
| fam4_nt | VC_2744   | No duplication | No  | COG1217 | Predicted membrane GTPase involved in stress response                                                                       | T  | Signal transduction mechanisms                               |
| fam4_nr | VC_2746   | No duplication | No  | COG0174 | Glutamine synthetase                                                                                                        | E  | Amino acid transport and metabolism                          |
| fam1_qc | VC_2747   | Duplication    | No  | No hit  |                                                                                                                             |    |                                                              |
| fam4_nq | VC_2748   | No duplication | No  | COG3852 | Signal transduction histidine kinase, nitrogen specific                                                                     | T  | Signal transduction mechanisms                               |
| fam1_jq | VC_2749   | Duplication    | No  | COG2204 | Response regulator containing CheY-like receiver, AAA-type ATPase, and DNA-binding domains                                  | T  | Signal transduction mechanisms                               |
| fam1_dy | VC_2750*  | Duplication    | No  | COG5001 | Predicted signal transduction protein containing a membrane domain, an EAL and a GGDEF domain                               | T  | Signal transduction mechanisms                               |
| fam1_dy | VC_2750*  | Duplication    | No  | COG2770 | FOG: HAMP domain                                                                                                            | T  | Signal transduction mechanisms                               |
| fam4_gg | VC_2757   | No duplication | HGT | COG1739 | Uncharacterized conserved protein                                                                                           | S  | Function unknown                                             |
| fam1_pm | VC_2758*  | Duplication    | HGT | COG1250 | 3-hydroxyacyl-CoA dehydrogenase                                                                                             | I  | Lipid transport and metabolism                               |
| fam1_pm | VC_2758*  | Duplication    | HGT | COG1024 | Enoyl-CoA hydratase/carnithine racemase                                                                                     | I  | Lipid transport and metabolism                               |
| fam4_gf | VC_2759   | No duplication | HGT | COG0183 | Acetyl-CoA acetyltransferase                                                                                                | I  | Lipid transport and metabolism                               |
| fam4_ge | VC_2760   | No duplication | HGT | COG0583 | Transcriptional regulator                                                                                                   | K  | Transcription                                                |
| fam4_gd | VC_2761   | No duplication | HGT | COG2814 | Arabinose efflux permease                                                                                                   | G  | Carbohydrate transport and metabolism                        |
| fam4_gc | VC_2762   | No duplication | No  | COG1207 | N-acetylglucosamine-1-phosphate uridylyltransferase (contains nucleotidyltransferase and I-patch acetyltransferase domains) | M  | Cell wall/membrane/envelope biogenesis                       |
| fam4_gb | VC_2763   | No duplication | No  | COG0355 | F0F1-type ATP synthase, epsilon subunit (mitochondrial delta subunit)                                                       | C  | Energy production and conversion                             |
| fam1_pl | VC_2764   | Duplication    | No  | COG0055 | F0F1-type ATP synthase, beta subunit                                                                                        | C  | Energy production and conversion                             |
| fam4_ga | VC_2765   | No duplication | No  | COG0224 | F0F1-type ATP synthase, gamma subunit                                                                                       | C  | Energy production and conversion                             |
| fam4_fz | VC_2766   | No duplication | No  | COG0056 | F0F1-type ATP synthase, alpha subunit                                                                                       | C  | Energy production and conversion                             |
| fam4_fy | VC_2767   | No duplication | No  | COG0712 | F0F1-type ATP synthase, delta subunit (mitochondrial oligomycin sensitivity protein)                                        | C  | Energy production and conversion                             |
| fam4_fx | VC_2768   | No duplication | No  | COG0711 | F0F1-type ATP synthase, subunit b                                                                                           | C  | Energy production and conversion                             |
| fam4_fw | VC_2769   | No duplication | No  | COG0636 | F0F1-type ATP synthase, subunit c/Archaeal/vacuolar-type H+-ATPase, subunit K                                               | C  | Energy production and conversion                             |
| fam1_pk | VC_2770   | Duplication    | No  | COG0356 | F0F1-type ATP synthase, subunit a                                                                                           | C  | Energy production and conversion                             |
| fam4_fv | VC_2771   | No duplication | No  | COG3312 | F0F1-type ATP synthase, subunit l                                                                                           | C  | Energy production and conversion                             |
| fam4_fs | VC_2774   | No duplication | No  | COG0357 | Predicted S-adenosylmethionine-dependent methyltransferase involved in bacterial cell division                              | M  | Cell wall/membrane/envelope biogenesis                       |
| fam2_an | VC_A0002  | No duplication | No  | No hit  |                                                                                                                             |    |                                                              |
| fam2_am | VC_A0003  | No duplication | No  | No hit  |                                                                                                                             |    |                                                              |
| fam2_ak | VC_A0004  | No duplication | No  | No hit  |                                                                                                                             |    |                                                              |
| fam2_aj | VC_A0005  | No duplication | No  | No hit  |                                                                                                                             |    |                                                              |
| fam2_ai | VC_A0006  | No duplication | No  | COG0217 | Uncharacterized conserved protein                                                                                           | S  | Function unknown                                             |
| fam2_ah | VC_A0007  | No duplication | No  | COG2084 | 3-hydroxyisobutyrate dehydrogenase and related beta-hydroxyacid dehydrogenases                                              | I  | Lipid transport and metabolism                               |
| fam2_ag | VC_A0008  | No duplication | No  | COG0840 | Methyl-accepting chemotaxis protein                                                                                         | NT | Multiple classes                                             |
| fam2_af | VC_A0010  | No duplication | No  | No hit  |                                                                                                                             |    |                                                              |
| fam1_kv | VC_A0011  | Duplication    | No  | COG2909 | ATP-dependent transcriptional regulator                                                                                     | K  | Transcription                                                |
| fam2_ae | VC_A0013  | No duplication | No  | COG0058 | Glucan phosphorylase                                                                                                        | G  | Carbohydrate transport and metabolism                        |
| fam2_ad | VC_A0014  | No duplication | No  | COG1640 | 4-alpha-glucanotransferase                                                                                                  | G  | Carbohydrate transport and metabolism                        |
| fam2_ac | VC_A0016  | No duplication | No  | COG0296 | 1,4-alpha-glucan branching enzyme                                                                                           | G  | Carbohydrate transport and metabolism                        |
| fam1_ab | VC_A0018  | Duplication    | HGT | COG3501 | Uncharacterized protein conserved in bacteria                                                                               | S  | Function unknown                                             |
| fam2_ab | VC_A0026  | No duplication | No  | COG3110 | Uncharacterized protein conserved in bacteria                                                                               | S  | Function unknown                                             |
| fam1_ku | VC_A0027* | Duplication    | No  | COG3325 | Chitinase                                                                                                                   | G  | Carbohydrate transport and metabolism                        |
| fam1_ku | VC_A0027* | Duplication    | No  | COG3979 | Uncharacterized protein contain chitin-binding domain type 3                                                                | R  | General function prediction only                             |
| fam2_aa | VC_A0029  | No duplication | HGT | COG1414 | Transcriptional regulator                                                                                                   | K  | Transcription                                                |
| fam1_tf | VC_A0030  | No duplication | No  | No hit  |                                                                                                                             |    |                                                              |
| fam1_fw | VC_A0033  | Duplication    | No  | COG3211 | Predicted phosphatase                                                                                                       | R  | General function prediction only                             |
| fam1_te | VC_A0035  | No duplication | No  | COG0671 | Membrane-associated phospholipid phosphatase                                                                                | I  | Lipid transport and metabolism                               |
| fam1_fv | VC_A0036  | Duplication    | No  | COG3633 | Na+/serine symporter                                                                                                        | E  | Amino acid transport and metabolism                          |
| fam1_td | VC_A0040  | No duplication | No  | COG2035 | Predicted membrane protein                                                                                                  | S  | Function unknown                                             |
| fam1_tc | VC_A0041  | No duplication | No  | COG0786 | Na+/glutamate symporter                                                                                                     | E  | Amino acid transport and metabolism                          |
| fam1_tb | VC_A0042  | No duplication | No  | No hit  |                                                                                                                             |    |                                                              |
| fam1_ta | VC_A0043  | No duplication | No  | COG2388 | Predicted acetyltransferase                                                                                                 | R  | General function prediction only                             |
| fam1_cf | VC_A0044  | Duplication    | No  | COG4946 | Uncharacterized protein related to the periplasmic component of the Tol biopolymer transport system                         | S  | Function unknown                                             |
| fam1_cf | VC_A0045  | Duplication    | No  | COG0793 | Periplasmic protease                                                                                                        | M  | Cell wall/membrane/envelope biogenesis                       |
| fam1_fu | VC_A0049  | Duplication    | No  | COG2199 | FOG: GGDEF domain                                                                                                           | T  | Signal transduction mechanisms                               |
| fam1_fu | VC_A0050  | Duplication    | No  | No hit  |                                                                                                                             |    |                                                              |
| fam1_sz | VC_A0051  | No duplication | No  | No hit  |                                                                                                                             |    |                                                              |
| fam1_sy | VC_A0056  | No duplication | No  | COG0789 | Predicted transcriptional regulators                                                                                        | K  | Transcription                                                |
| fam1_sx | VC_A0057  | No duplication | No  | COG0415 | Deoxyribodipyrimidine photolyase                                                                                            | L  | Replication, recombination and repair                        |
| fam1_sw | VC_A0063  | Duplication    | No  | COG1770 | Protease II                                                                                                                 | E  | Amino acid transport and metabolism                          |
| fam1_ft | VC_A0064  | Duplication    | No  | COG1629 | Outer membrane receptor proteins, mostly Fe transport                                                                       | P  | Inorganic ion transport and metabolism                       |
| fam5_dl | VC_A0065  | No duplication | No  | COG4935 | Regulatory P domain of the subtilisin-like proprotein convertases and other proteases                                       | O  | Posttranslational modification, protein turnover, chaperones |
| fam5_dk | VC_A0066  | No duplication | No  | No hit  |                                                                                                                             |    |                                                              |
| fam5_dj | VC_A0067  | No duplication | No  | No hit  |                                                                                                                             |    |                                                              |
| fam1_su | VC_A0070  | No duplication | No  | COG0226 | ABC-type phosphate transport system, periplasmic component                                                                  | P  | Inorganic ion transport and metabolism                       |
| fam1_st | VC_A0071  | No duplication | No  | COG0573 | ABC-type phosphate transport system, permease component                                                                     | P  | Inorganic ion transport and metabolism                       |
| fam1_ss | VC_A0072  | No duplication | No  | COG0581 | ABC-type phosphate transport system, permease component                                                                     | P  | Inorganic ion transport and metabolism                       |
| fam1_sr | VC_A0073  | No duplication | No  | COG1117 | ABC-type phosphate transport system, ATPase component                                                                       | P  | Inorganic ion transport and metabolism                       |
| fam1_kt | VC_A0074  | Duplication    | No  | COG2199 | FOG: GGDEF domain                                                                                                           | T  | Signal transduction mechanisms                               |
| fam1_sq | VC_A0075  | No duplication | No  | COG3915 | Uncharacterized protein conserved in bacteria                                                                               | S  | Function unknown                                             |

Orata et al. Genetic Interactions Between *V. metoecus* and *V. cholerae*

|         |           |                |     |         |                                                                                                         |     |                                                              |
|---------|-----------|----------------|-----|---------|---------------------------------------------------------------------------------------------------------|-----|--------------------------------------------------------------|
| fam1_sp | VC_A0077  | No duplication | No  | COG0659 | Sulfate permease and related transporters (MFS superfamily)                                             | P   | Inorganic ion transport and metabolism                       |
| fam1_so | VC_A0078  | No duplication | No  | No hit  |                                                                                                         |     |                                                              |
| fam1_sn | VC_A0079  | No duplication | No  | COG0739 | Membrane proteins related to metalloendopeptidases                                                      | M   | Cell wall/membrane/envelope biogenesis                       |
| fam1_kr | VC_A0080  | Duplication    | No  | COG5001 | Predicted signal transduction protein containing a membrane domain, an EAL and a GGDEF domain           | T   | Signal transduction mechanisms                               |
| fam1_sm | VC_A0082  | No duplication | No  | COG0583 | Transcriptional regulator                                                                               | K   | Transcription                                                |
| fam1_sl | VC_A0083  | No duplication | No  | COG2814 | Arabinose efflux permease                                                                               | G   | Carbohydrate transport and metabolism                        |
| fam1_sk | VC_A0087  | No duplication | No  | No hit  |                                                                                                         |     |                                                              |
| fam1_kq | VC_A0098  | Duplication    | No  | COG1488 | Nicotinic acid phosphoribosyltransferase                                                                | H   | Coenzyme transport and metabolism                            |
| fam1_kp | VC_A0099  | Duplication    | No  | COG0673 | Predicted dehydrogenases and related proteins                                                           | R   | General function prediction only                             |
| fam1_si | VC_A0100  | No duplication | No  | COG0607 | Rhodanese-related sulfurtransferase                                                                     | P   | Inorganic ion transport and metabolism                       |
| fam1_sh | VC_A0101  | No duplication | No  | COG2200 | FOG: EAL domain                                                                                         | T   | Signal transduction mechanisms                               |
| fam1_sg | VC_A0102  | No duplication | No  | COG0637 | Predicted phosphatase/phosphohexomutase                                                                 | R   | General function prediction only                             |
| fam1_sf | VC_A0103  | No duplication | No  | COG0659 | Sulfate permease and related transporters (MFS superfamily)                                             | P   | Inorganic ion transport and metabolism                       |
| fam1_ko | VC_A0104  | Duplication    | No  | COG0564 | Pseudouridylate synthases, 23S RNA-specific                                                             | J   | Translation, ribosomal structure and biogenesis              |
| fam1_kn | VC_A0105  | Duplication    | No  | COG4104 | Uncharacterized conserved protein                                                                       | S   | Function unknown                                             |
| fam1_se | VC_A0106  | No duplication | No  | No hit  |                                                                                                         |     |                                                              |
| fam1_sd | VC_A0107  | No duplication | No  | COG3516 | Uncharacterized protein conserved in bacteria                                                           | S   | Function unknown                                             |
| fam1_fs | VC_A0108  | Duplication    | No  | COG3517 | Uncharacterized protein conserved in bacteria                                                           | S   | Function unknown                                             |
| fam1_sb | VC_A0109  | No duplication | No  | COG3518 | Uncharacterized protein conserved in bacteria                                                           | S   | Function unknown                                             |
| fam1_sa | VC_A0110  | No duplication | No  | COG3519 | Uncharacterized protein conserved in bacteria                                                           | S   | Function unknown                                             |
| fam1_rz | VC_A0111  | No duplication | No  | COG3520 | Uncharacterized protein conserved in bacteria                                                           | S   | Function unknown                                             |
| fam1_ry | VC_A0112  | No duplication | No  | COG3456 | Uncharacterized conserved protein, contains FHA domain                                                  | T   | Signal transduction mechanisms                               |
| fam1_rx | VC_A0113  | No duplication | No  | COG3521 | Uncharacterized protein conserved in bacteria                                                           | S   | Function unknown                                             |
| fam1_rw | VC_A0114  | No duplication | No  | COG3522 | Uncharacterized protein conserved in bacteria                                                           | S   | Function unknown                                             |
| fam1_rv | VC_A0115  | No duplication | No  | COG3455 | Uncharacterized protein conserved in bacteria                                                           | S   | Function unknown                                             |
| fam1_ru | VC_A0117  | No duplication | No  | COG3829 | Transcriptional regulator containing PAS, AAA-type ATPase, and DNA-binding domains                      | KT  | Multiple classes                                             |
| fam1_rt | VC_A0118  | No duplication | No  | No hit  |                                                                                                         |     |                                                              |
| fam5_cw | VC_A0119  | No duplication | No  | COG3515 | Uncharacterized protein conserved in bacteria                                                           | S   | Function unknown                                             |
| fam1_rf | VC_A0120  | Duplication    | No  | COG3523 | Uncharacterized protein conserved in bacteria                                                           | S   | Function unknown                                             |
| fam5_cv | VC_A0121  | No duplication | No  | COG3515 | Uncharacterized protein conserved in bacteria                                                           | S   | Function unknown                                             |
| fam1_ab | VC_A0123* | Duplication    | HGT | COG3501 | Uncharacterized protein conserved in bacteria                                                           | S   | Function unknown                                             |
| fam1_ab | VC_A0123* | Duplication    | HGT | COG3409 | Putative peptidoglycan-binding domain-containing protein                                                | M   | Cell wall/membrane/envelope biogenesis                       |
| fam1_ea | VC_A0161  | Duplication    | No  | COG3033 | Tryptophanase                                                                                           | E   | Amino acid transport and metabolism                          |
| fam5_cr | VC_A0163  | No duplication | No  | COG3530 | Uncharacterized protein conserved in bacteria                                                           | S   | Function unknown                                             |
| fam5_cq | VC_A0164  | No duplication | No  | COG3034 | Uncharacterized protein conserved in bacteria                                                           | S   | Function unknown                                             |
| fam1_jh | VC_A0165  | Duplication    | No  | COG2199 | FOG: GGDEF domain                                                                                       | T   | Signal transduction mechanisms                               |
| fam5_cp | VC_A0166  | No duplication | No  | COG1278 | Cold shock proteins                                                                                     | K   | Transcription                                                |
| fam5_co | VC_A0167  | No duplication | No  | COG2859 | Uncharacterized protein conserved in bacteria                                                           | S   | Function unknown                                             |
| fam1_jg | VC_A0168  | Duplication    | No  | No hit  |                                                                                                         |     |                                                              |
| fam1_jg | VC_A0169  | Duplication    | No  | No hit  |                                                                                                         |     |                                                              |
| fam1_jg | VC_A0170  | Duplication    | No  | No hit  |                                                                                                         |     |                                                              |
| fam1_ju | VC_A0171* | Duplication    | No  | COG2304 | Uncharacterized protein containing a von Willebrand factor type A (vWA) domain                          | R   | General function prediction only                             |
| fam1_ju | VC_A0171* | Duplication    | No  | COG5624 | Transcription initiation factor TFIID, subunit TAF12 (also component of histone acetyltransferase SAGA) | K   | Transcription                                                |
| fam5_cn | VC_A0172  | No duplication | No  | No hit  |                                                                                                         |     |                                                              |
| fam5_cm | VC_A0173  | No duplication | No  | No hit  |                                                                                                         |     |                                                              |
| fam5_ck | VC_A0175  | No duplication | No  | COG0714 | MoxR-like ATPases                                                                                       | R   | General function prediction only                             |
| fam5_cj | VC_A0176  | No duplication | No  | COG0840 | Methyl-accepting chemotaxis protein                                                                     | NT  | Multiple classes                                             |
| fam5_ci | VC_A0177  | No duplication | No  | No hit  |                                                                                                         |     |                                                              |
| fam1_rd | VC_A0178  | Duplication    | No  | COG2761 | Predicted dithiol-disulfide isomerase involved in polyketide biosynthesis                               | Q   | Secondary metabolites biosynthesis, transport and catabolism |
| fam5_ch | VC_A0179  | No duplication | No  | COG1972 | Nucleoside permease                                                                                     | F   | Nucleotide transport and metabolism                          |
| fam1_rc | VC_A0180  | Duplication    | No  | COG2195 | Di- and tripeptidases                                                                                   | E   | Amino acid transport and metabolism                          |
| fam5_cg | VC_A0181  | No duplication | No  | COG0668 | Small-conductance mechanosensitive channel                                                              | M   | Cell wall/membrane/envelope biogenesis                       |
| fam1_rb | VC_A0182  | Duplication    | No  | COG3604 | Transcriptional regulator containing GAF, AAA-type ATPase, and DNA binding domains                      | KT  | Multiple classes                                             |
| fam5_cf | VC_A0183* | No duplication | No  | COG1017 | Hemoglobin-like flavoprotein                                                                            | C   | Energy production and conversion                             |
| fam5_cf | VC_A0183* | No duplication | No  | COG1018 | Flavodoxin reductases (ferredoxin-NADPH reductases) family 1                                            | C   | Energy production and conversion                             |
| fam5_ce | VC_A0186  | No duplication | No  | No hit  |                                                                                                         |     |                                                              |
| fam5_cd | VC_A0189* | No duplication | No  | COG1776 | Chemotaxis protein CheC, inhibitor of MCP methylation                                                   | NT  | Multiple classes                                             |
| fam5_cd | VC_A0189* | No duplication | No  | COG3706 | Response regulator containing a CheY-like receiver domain and a GGDEF domain                            | T   | Signal transduction mechanisms                               |
| fam5_cc | VC_A0190  | No duplication | No  | No hit  |                                                                                                         |     |                                                              |
| fam5_cb | VC_A0191* | No duplication | No  | COG0063 | Predicted sugar kinase                                                                                  | G   | Carbohydrate transport and metabolism                        |
| fam5_cb | VC_A0191* | No duplication | No  | COG0062 | Uncharacterized conserved protein                                                                       | S   | Function unknown                                             |
| fam5_ca | VC_A0192  | No duplication | No  | COG1052 | Lactate dehydrogenase and related dehydrogenases                                                        | CHR | Multiple classes                                             |
| fam5_bz | VC_A0193  | No duplication | No  | COG1757 | Na <sup>+</sup> /H <sup>+</sup> antiporter                                                              | C   | Energy production and conversion                             |
| fam1_ra | VC_A0194  | Duplication    | No  | COG1226 | Kef-type K <sup>+</sup> transport systems, predicted NAD-binding component                              | P   | Inorganic ion transport and metabolism                       |
| fam5_by | VC_A0195  | No duplication | No  | No hit  |                                                                                                         |     |                                                              |
| fam5_bx | VC_A0204  | No duplication | HGT | COG0513 | Superfamily II DNA and RNA helicases                                                                    | LKJ | Multiple classes                                             |
| fam5_bw | VC_A0205  | No duplication | HGT | COG2704 | Anaerobic C4-dicarboxylate transporter                                                                  | R   | General function prediction only                             |
| fam5_bv | VC_A0207  | No duplication | HGT | COG0171 | NAD synthase                                                                                            | H   | Coenzyme transport and metabolism                            |

Orata et al. Genetic Interactions Between *V. metoecus* and *V. cholerae*

|         |           |                |     |         |                                                                                                     |    |                                                              |
|---------|-----------|----------------|-----|---------|-----------------------------------------------------------------------------------------------------|----|--------------------------------------------------------------|
| fam1_qy | VC_A0208  | Duplication    | No  | COG1057 | Nicotinic acid mononucleotide adenyllyltransferase                                                  | H  | Coenzyme transport and metabolism                            |
| fam5_bu | VC_A0210  | No duplication | No  | COG3437 | Response regulator containing a CheY-like receiver domain and an HD-GYP domain                      | KT | Multiple classes                                             |
| fam5_bt | VC_A0211  | No duplication | No  | COG4191 | Signal transduction histidine kinase regulating C4-dicarboxylate transport system                   | T  | Signal transduction mechanisms                               |
| fam1_aj | VC_A0213  | Duplication    | HGT | COG1757 | Na <sup>+</sup> /H <sup>+</sup> antiporter                                                          | C  | Energy production and conversion                             |
| fam5_br | VC_A0214  | No duplication | No  | COG2814 | Arabinose efflux permease                                                                           | G  | Carbohydrate transport and metabolism                        |
| fam1_qx | VC_A0218  | Duplication    | No  | COG3240 | Phospholipase/lecithinase/hemolysin                                                                 | IR | Multiple classes                                             |
| fam1_em | VC_A0240  | Duplication    | HGT | No hit  |                                                                                                     |    |                                                              |
| fam1_en | VC_A0241  | Duplication    | HGT | COG3623 | Putative L-xylulose-5-phosphate 3-epimerase                                                         | G  | Carbohydrate transport and metabolism                        |
| fam1_eo | VC_A0242  | Duplication    | HGT | COG0269 | 3-hexulose-6-phosphate synthase and related proteins                                                | G  | Carbohydrate transport and metabolism                        |
| fam1_ep | VC_A0243  | Duplication    | HGT | COG0561 | Predicted hydrolases of the HAD superfamily                                                         | R  | General function prediction only                             |
| fam1_eq | VC_A0244  | Duplication    | HGT | COG0235 | Ribulose-5-phosphate 4-epimerase and related epimerases and aldolases                               | G  | Carbohydrate transport and metabolism                        |
| fam1_er | VC_A0245  | Duplication    | HGT | COG1762 | Phosphotransferase system mannitol/fructose-specific IIA domain (Ntr-type)                          | GT | Multiple classes                                             |
| fam1_es | VC_A0246* | Duplication    | HGT | COG3037 | Uncharacterized protein conserved in bacteria                                                       | S  | Function unknown                                             |
| fam1_es | VC_A0246* | Duplication    | HGT | COG3414 | Phosphotransferase system, galactitol-specific IIB component                                        | G  | Carbohydrate transport and metabolism                        |
| fam1_et | VC_A0247  | Duplication    | HGT | COG1349 | Transcriptional regulators of sugar metabolism                                                      | KG | Multiple classes                                             |
| fam1_eu | VC_A0248  | Duplication    | HGT | COG2220 | Predicted Zn-dependent hydrolases of the beta-lactamase fold                                        | R  | General function prediction only                             |
| fam1_kd | VC_A0249  | Duplication    | HGT | COG3038 | Cytochrome B561                                                                                     | C  | Energy production and conversion                             |
| fam1_bv | VC_A0254  | Duplication    | HGT | No hit  |                                                                                                     |    |                                                              |
| fam5_bp | VC_A0265  | No duplication | HGT | No hit  |                                                                                                     |    |                                                              |
| fam5_bo | VC_A0269  | Duplication    | No  | COG0076 | Glutamate decarboxylase and related PLP-dependent proteins                                          | E  | Amino acid transport and metabolism                          |
| fam5_bn | VC_A0271  | No duplication | No  | No hit  |                                                                                                     |    |                                                              |
| fam1_jf | VC_A0274  | Duplication    | No  | COG3338 | Carbonic anhydrase                                                                                  | P  | Inorganic ion transport and metabolism                       |
| fam5_bl | VC_A0277  | No duplication | HGT | COG0509 | Glycine cleavage system H protein (lipoate-binding)                                                 | E  | Amino acid transport and metabolism                          |
| fam1_je | VC_A0279  | Duplication    | HGT | COG1396 | Predicted transcriptional regulators                                                                | K  | Transcription                                                |
| fam1_kn | VC_A0284  | Duplication    | No  | COG4104 | Uncharacterized conserved protein                                                                   | S  | Function unknown                                             |
| fam1_jd | VC_A0287  | Duplication    | HGT | COG0441 | Threonyl-tRNA synthetase                                                                            | J  | Translation, ribosomal structure and biogenesis              |
| fam1_jb | VC_A0510  | Duplication    | No  | COG1524 | Uncharacterized proteins of the AP superfamily                                                      | R  | General function prediction only                             |
| fam1_ja | VC_A0511  | Duplication    | No  | COG1328 | Oxygen-sensitive ribonucleoside-triphosphate reductase                                              | F  | Nucleotide transport and metabolism                          |
| fam5_be | VC_A0512  | No duplication | No  | COG0602 | Organic radical activating enzymes                                                                  | O  | Posttranslational modification, protein turnover, chaperones |
| fam5_bd | VC_A0514  | No duplication | No  | COG4067 | Uncharacterized protein conserved in archaea                                                        | O  | Posttranslational modification, protein turnover, chaperones |
| fam1_jp | VC_A0516* | Duplication    | No  | COG1299 | Phosphotransferase system, fructose-specific IIC component                                          | G  | Carbohydrate transport and metabolism                        |
| fam1_ip | VC_A0516* | Duplication    | No  | COG1445 | Phosphotransferase system fructose-specific component IIB                                           | G  | Carbohydrate transport and metabolism                        |
| fam5_bc | VC_A0517  | No duplication | No  | COG1105 | Fructose-1-phosphate kinase and related fructose-6-phosphate kinase (PfkB)                          | G  | Carbohydrate transport and metabolism                        |
| fam5_bb | VC_A0518* | No duplication | No  | COG4668 | Mannitol/fructose-specific phosphotransferase system, IIA domain                                    | G  | Carbohydrate transport and metabolism                        |
| fam5_bb | VC_A0518* | No duplication | No  | COG1925 | Phosphotransferase system, HPr-related proteins                                                     | G  | Carbohydrate transport and metabolism                        |
| fam5_ba | VC_A0519  | No duplication | No  | COG1609 | Transcriptional regulators                                                                          | K  | Transcription                                                |
| fam5_ay | VC_A0520  | No duplication | No  | COG0420 | DNA repair exonuclease                                                                              | L  | Replication, recombination and repair                        |
| fam1_qt | VC_A0521  | Duplication    | No  | COG0419 | ATPase involved in DNA repair                                                                       | L  | Replication, recombination and repair                        |
| fam1_iz | VC_A0522* | Duplication    | No  | COG0642 | Signal transduction histidine kinase                                                                | T  | Signal transduction mechanisms                               |
| fam1_iz | VC_A0522* | Duplication    | No  | COG0784 | FOG: CheY-like receiver                                                                             | T  | Signal transduction mechanisms                               |
| fam5_ax | VC_A0523  | No duplication | No  | COG0156 | 7-keto-8-aminopelargonate synthetase and related enzymes                                            | H  | Coenzyme transport and metabolism                            |
| fam5_aw | VC_A0524  | No duplication | No  | COG1275 | Tellurite resistance protein and related permeases                                                  | P  | Inorganic ion transport and metabolism                       |
| fam5_av | VC_A0526  | No duplication | No  | COG0038 | Chloride channel protein EriC                                                                       | P  | Inorganic ion transport and metabolism                       |
| fam5_au | VC_A0527  | No duplication | HGT | COG0523 | Putative GTPases (G3E family)                                                                       | R  | General function prediction only                             |
| fam1_qs | VC_A0528  | Duplication    | HGT | COG1161 | Predicted GTPases                                                                                   | R  | General function prediction only                             |
| fam5_ar | VC_A0546  | No duplication | No  | COG0861 | Membrane protein TerC, possibly involved in tellurium resistance                                    | P  | Inorganic ion transport and metabolism                       |
| fam5_aq | VC_A0554  | No duplication | No  | COG2223 | Nitrate/nitrite transporter                                                                         | P  | Inorganic ion transport and metabolism                       |
| fam5_ap | VC_A0556  | No duplication | No  | No hit  |                                                                                                     |    |                                                              |
| fam5_ao | VC_A0558  | No duplication | No  | COG0405 | Gamma-glutamyltransferase                                                                           | E  | Amino acid transport and metabolism                          |
| fam5_an | VC_A0559  | No duplication | No  | COG4206 | Outer membrane cobalamin receptor protein                                                           | H  | Coenzyme transport and metabolism                            |
| fam5_am | VC_A0560  | No duplication | No  | COG2199 | FOG: GGDEF domain                                                                                   | T  | Signal transduction mechanisms                               |
| fam5_al | VC_A0561  | No duplication | No  | No hit  |                                                                                                     |    |                                                              |
| fam5_ak | VC_A0562  | No duplication | No  | COG5453 | Uncharacterized conserved protein                                                                   | S  | Function unknown                                             |
| fam5_aj | VC_A0564  | No duplication | HGT | COG1282 | NAD/NADP transhydrogenase beta subunit                                                              | C  | Energy production and conversion                             |
| fam5_ai | VC_A0565  | No duplication | No  | COG0642 | Signal transduction histidine kinase                                                                | T  | Signal transduction mechanisms                               |
| fam5_ah | VC_A0566  | No duplication | No  | COG0745 | Response regulators consisting of a CheY-like receiver domain and a winged-helix DNA-binding domain | TK | Multiple classes                                             |
| fam1_qp | VC_A0567  | Duplication    | No  | No hit  |                                                                                                     |    |                                                              |
| fam5_ag | VC_A0568  | No duplication | No  | No hit  |                                                                                                     |    |                                                              |
| fam1_ki | VC_A0569  | Duplication    | No  | COG3140 | Uncharacterized protein conserved in bacteria                                                       | S  | Function unknown                                             |
| fam5_af | VC_A0570  | No duplication | No  | COG0023 | Translation initiation factor 1 (eIF-1/SU11) and related proteins                                   | J  | Translation, ribosomal structure and biogenesis              |
| fam5_ae | VC_A0573  | No duplication | No  | COG3266 | Uncharacterized protein conserved in bacteria                                                       | S  | Function unknown                                             |
| fam1_iy | VC_A0574* | Duplication    | No  | COG1042 | Acyl-CoA synthetase (NDP forming)                                                                   | C  | Energy production and conversion                             |
| fam1_iy | VC_A0574* | Duplication    | No  | COG1247 | Sortase and related acyltransferases                                                                | M  | Cell wall/membrane/envelope biogenesis                       |
| fam5_ad | VC_A0575  | No duplication | No  | COG0583 | Transcriptional regulator                                                                           | K  | Transcription                                                |
| fam1_gk | VC_A0576  | Duplication    | HGT | COG1629 | Outer membrane receptor proteins, mostly Fe transport                                               | P  | Inorganic ion transport and metabolism                       |
| fam2_lm | VC_A0578  | No duplication | No  | COG4533 | ABC-type uncharacterized transport system, periplasmic component                                    | R  | General function prediction only                             |
| fam2_ll | VC_A0580  | No duplication | No  | COG2050 | Uncharacterized protein, possibly involved in aromatic compounds catabolism                         | Q  | Secondary metabolites biosynthesis, transport and catabolism |
| fam2_lk | VC_A0581  | No duplication | No  | COG4783 | Putative Zn-dependent protease, contains TPR repeats                                                | R  | General function prediction only                             |



Orata et al. Genetic Interactions Between *V. metoecus* and *V. cholerae*

|         |           |                |     |         |                                                                                             |    |                                                              |
|---------|-----------|----------------|-----|---------|---------------------------------------------------------------------------------------------|----|--------------------------------------------------------------|
| fam2_lj | VC_A0582  | No duplication | No  | COG2501 | Uncharacterized conserved protein                                                           | S  | Function unknown                                             |
| fam1_dl | VC_A0583  | Duplication    | No  | COG0834 | ABC-type amino acid transport/signal transduction systems, periplasmic component/domain     | ET | Multiple classes                                             |
| fam2_li | VC_A0584  | No duplication | No  | COG0625 | Glutathione S-transferase                                                                   | O  | Posttranslational modification, protein turnover, chaperones |
| fam2_lh | VC_A0585  | No duplication | No  | COG0625 | Glutathione S-transferase                                                                   | O  | Posttranslational modification, protein turnover, chaperones |
| fam2_lg | VC_A0586  | No duplication | No  | COG1309 | Transcriptional regulator                                                                   | K  | Transcription                                                |
| fam2_lf | VC_A0587  | No duplication | No  | COG1661 | Predicted DNA-binding protein with PD1-like DNA-binding motif                               | R  | General function prediction only                             |
| fam1_ae | VC_A0588  | Duplication    | HGT | COG4172 | ABC-type uncharacterized transport system, duplicated ATPase component                      | R  | General function prediction only                             |
| fam2_le | VC_A0589  | No duplication | No  | COG4239 | ABC-type uncharacterized transport system, permease component                               | R  | General function prediction only                             |
| fam1_ak | VC_A0590  | Duplication    | HGT | COG4174 | ABC-type uncharacterized transport system, permease component                               | R  | General function prediction only                             |
| fam1_ak | VC_A0591  | Duplication    | HGT | COG4166 | ABC-type oligopeptide transport system, periplasmic component                               | E  | Amino acid transport and metabolism                          |
| fam2_ld | VC_A0592  | No duplication | No  | COG1051 | ADP-ribose pyrophosphatase                                                                  | F  | Nucleotide transport and metabolism                          |
| fam1_lu | VC_A0593  | Duplication    | No  | COG0618 | Exopolyphosphatase-related proteins                                                         | R  | General function prediction only                             |
| fam2_lc | VC_A0595  | No duplication | HGT | No hit  |                                                                                             |    |                                                              |
| fam2_lb | VC_A0599  | No duplication | HGT | No hit  |                                                                                             |    |                                                              |
| fam2_la | VC_A0600  | No duplication | HGT | COG2188 | Transcriptional regulators                                                                  | K  | Transcription                                                |
| fam2_kw | VC_A0604  | No duplication | HGT | COG0075 | Serine-pyruvate aminotransferase/archaeal aspartate aminotransferase                        | E  | Amino acid transport and metabolism                          |
| fam2_kv | VC_A0609  | No duplication | HGT | No hit  |                                                                                             |    |                                                              |
| fam1_lt | VC_A0610  | Duplication    | HGT | COG3155 | Uncharacterized protein involved in an early stage of isoprenoid biosynthesis               | Q  | Secondary metabolites biosynthesis, transport and catabolism |
| fam2_kt | VC_A0612  | No duplication | HGT | COG1970 | Large-conductance mechanosensitive channel                                                  | M  | Cell wall/membrane/envelope biogenesis                       |
| fam1_dk | VC_A0614  | Duplication    | HGT | COG2759 | Formyltetrahydrofolate synthetase                                                           | F  | Nucleotide transport and metabolism                          |
| fam2_ks | VC_A0615* | No duplication | HGT | COG0225 | Peptide methionine sulfoxide reductase                                                      | O  | Posttranslational modification, protein turnover, chaperones |
| fam2_ks | VC_A0615* | No duplication | HGT | COG0229 | Conserved domain frequently associated with peptide methionine sulfoxide reductase          | O  | Posttranslational modification, protein turnover, chaperones |
| fam1_gj | VC_A0616  | Duplication    | HGT | COG0302 | GTP cyclohydrolase I                                                                        | H  | Coenzyme transport and metabolism                            |
| fam1_gi | VC_A0617  | Duplication    | HGT | COG0303 | Molybdopterin biosynthesis enzyme                                                           | H  | Coenzyme transport and metabolism                            |
| fam2_kr | VC_A0618  | No duplication | No  | COG0476 | Dinucleotide-utilizing enzymes involved in molybdopterin and thiamine biosynthesis family 2 | H  | Coenzyme transport and metabolism                            |
| fam2_kq | VC_A0619  | No duplication | No  | No hit  |                                                                                             |    |                                                              |
| fam2_kp | VC_A0620  | No duplication | HGT | COG2897 | Rhodanese-related sulfurtransferase                                                         | P  | Inorganic ion transport and metabolism                       |
| fam2_ko | VC_A0621  | No duplication | HGT | COG2390 | Transcriptional regulator, contains sigma factor-related N-terminal domain                  | K  | Transcription                                                |
| fam2_km | VC_A0623  | No duplication | HGT | COG0176 | Transaldolase                                                                               | G  | Carbohydrate transport and metabolism                        |
| fam2_kl | VC_A0627  | No duplication | HGT | COG0219 | Predicted rRNA methylase (SpoU class)                                                       | J  | Translation, ribosomal structure and biogenesis              |
| fam2_kk | VC_A0629  | No duplication | HGT | COG3180 | Putative ammonia monooxygenase                                                              | R  | General function prediction only                             |
| fam1_gh | VC_A0630  | Duplication    | HGT | COG0111 | Phosphoglycerate dehydrogenase and related dehydrogenases                                   | HE | Multiple classes                                             |
| fam1_gg | VC_A0631  | Duplication    | HGT | COG3981 | Predicted acetyltransferase                                                                 | R  | General function prediction only                             |
| fam2_kj | VC_A0632  | No duplication | HGT | COG1051 | ADP-ribose pyrophosphatase                                                                  | F  | Nucleotide transport and metabolism                          |
| fam2_ki | VC_A0633  | No duplication | HGT | COG3136 | Uncharacterized membrane protein required for alginate biosynthesis                         | R  | General function prediction only                             |
| fam2_kh | VC_A0634  | No duplication | HGT | COG2384 | Predicted SAM-dependent methyltransferase                                                   | R  | General function prediction only                             |
| fam2_kg | VC_A0636  | No duplication | HGT | COG1359 | Uncharacterized conserved protein                                                           | S  | Function unknown                                             |
| fam1_jv | VC_A0637  | Duplication    | HGT | COG0778 | Nitroreductase                                                                              | C  | Energy production and conversion                             |
| fam2_kf | VC_A0638  | No duplication | No  | COG0841 | Cation/multidrug efflux pump                                                                | V  | Defense mechanisms                                           |
| fam1_ls | VC_A0639  | Duplication    | No  | COG0845 | Membrane-fusion protein                                                                     | M  | Cell wall/membrane/envelope biogenesis                       |
| fam2_ke | VC_A0640  | No duplication | No  | COG2391 | Predicted transporter component                                                             | R  | General function prediction only                             |
| fam2_kd | VC_A0641  | No duplication | No  | COG2391 | Predicted transporter component                                                             | R  | General function prediction only                             |
| fam2_kc | VC_A0642  | No duplication | No  | COG0640 | Predicted transcriptional regulators                                                        | K  | Transcription                                                |
| fam2_ka | VC_A0644* | No duplication | No  | COG0446 | Uncharacterized NAD(FAD)-dependent dehydrogenases                                           | R  | General function prediction only                             |
| fam2_ka | VC_A0644* | No duplication | No  | COG0607 | Rhodanese-related sulfurtransferase                                                         | P  | Inorganic ion transport and metabolism                       |
| fam1_an | VC_A0646  | Duplication    | HGT | COG3176 | Putative hemolysin                                                                          | R  | General function prediction only                             |
| fam2_jz | VC_A0652  | No duplication | HGT | No hit  |                                                                                             |    |                                                              |
| fam5_gh | VC_A0653* | No duplication | HGT | COG1263 | Phosphotransferase system IIC components, glucose/maltose/N-acetylglucosamine-specific      | G  | Carbohydrate transport and metabolism                        |
| fam5_gh | VC_A0653* | No duplication | HGT | COG1264 | Phosphotransferase system IIB components                                                    | G  | Carbohydrate transport and metabolism                        |
| fam5_gg | VC_A0654  | No duplication | HGT | COG1609 | Transcriptional regulators                                                                  | K  | Transcription                                                |
| fam5_gf | VC_A0655  | No duplication | HGT | COG1621 | Beta-fructosidases (levanase/invertase)                                                     | G  | Carbohydrate transport and metabolism                        |
| fam5_ge | VC_A0656  | No duplication | HGT | COG0524 | Sugar kinases, ribokinase family                                                            | G  | Carbohydrate transport and metabolism                        |
| fam2_jx | VC_A0657  | No duplication | HGT | COG0578 | Glycerol-3-phosphate dehydrogenase                                                          | C  | Energy production and conversion                             |
| fam1_dj | VC_A0658* | Duplication    | HGT | COG0840 | Methyl-accepting chemotaxis protein                                                         | NT | Multiple classes                                             |
| fam1_dj | VC_A0658* | Duplication    | HGT | COG2202 | FOG: PAS/PAC domain                                                                         | T  | Signal transduction mechanisms                               |
| fam2_jw | VC_A0659  | No duplication | No  | COG2885 | Outer membrane protein and related peptidoglycan-associated (lipo)proteins                  | M  | Cell wall/membrane/envelope biogenesis                       |
| fam2_jv | VC_A0661  | No duplication | No  | COG0545 | FKBP-type peptidyl-prolyl cis-trans isomerases 1                                            | O  | Posttranslational modification, protein turnover, chaperones |
| fam2_jt | VC_A0662  | No duplication | No  | COG0637 | Predicted phosphatase/phosphohexomutase                                                     | R  | General function prediction only                             |
| fam2_js | VC_A0663  | No duplication | No  | COG0840 | Methyl-accepting chemotaxis protein                                                         | NT | Multiple classes                                             |
| fam2_jr | VC_A0665  | No duplication | No  | COG3069 | C4-dicarboxylate transporter                                                                | C  | Energy production and conversion                             |
| fam2_jq | VC_A0666  | No duplication | No  | COG1760 | L-serine deaminase                                                                          | E  | Amino acid transport and metabolism                          |
| fam2_jo | VC_A0675  | No duplication | No  | COG3850 | Signal transduction histidine kinase, nitrate/nitrite-specific                              | T  | Signal transduction mechanisms                               |
| fam2_jn | VC_A0676  | No duplication | No  | COG1142 | Fe-S-cluster-containing hydrogenase components 2                                            | C  | Energy production and conversion                             |
| fam2_jm | VC_A0677  | No duplication | HGT | COG3062 | Uncharacterized protein involved in formation of periplasmic nitrate reductase              | P  | Inorganic ion transport and metabolism                       |
| fam1_gf | VC_A0678  | Duplication    | No  | COG0243 | Anaerobic dehydrogenases, typically selenocysteine-containing                               | C  | Energy production and conversion                             |
| fam2_jl | VC_A0679  | No duplication | No  | COG3043 | Nitrate reductase cytochrome c-type subunit                                                 | C  | Energy production and conversion                             |
| fam2_jk | VC_A0680  | No duplication | No  | COG3005 | Nitrate/TMAO reductases, membrane-bound tetraheme cytochrome c subunit                      | C  | Energy production and conversion                             |
| fam1_lr | VC_A0682  | Duplication    | HGT | COG2197 | Response regulator containing a CheY-like receiver domain and an HTH DNA-binding domain     | TK | Multiple classes                                             |

Orata et al. Genetic Interactions Between *V. metoecus* and *V. cholerae*

|         |           |                |     |         |                                                                                             |     |                                                               |
|---------|-----------|----------------|-----|---------|---------------------------------------------------------------------------------------------|-----|---------------------------------------------------------------|
| fam2_ji | VC_A0683  | No duplication | HGT | COG3851 | Signal transduction histidine kinase, glucose-6-phosphate specific                          | T   | Signal transduction mechanisms                                |
| fam2_jh | VC_A0684  | No duplication | HGT | COG2271 | Sugar phosphate permease                                                                    | G   | Carbohydrate transport and metabolism                         |
| fam2_jg | VC_A0685  | No duplication | No  | COG1840 | ABC-type Fe3+ transport system, periplasmic component                                       | P   | Inorganic ion transport and metabolism                        |
| fam1_jq | VC_A0686  | Duplication    | HGT | COG1178 | ABC-type Fe3+ transport system, permease component                                          | P   | Inorganic ion transport and metabolism                        |
| fam2_jf | VC_A0687  | No duplication | HGT | COG3842 | ABC-type spermidine/putrescine transport systems, ATPase components                         | E   | Amino acid transport and metabolism                           |
| fam1_jp | VC_A0688  | Duplication    | HGT | COG3243 | Poly(3-hydroxyalkanoate) synthetase                                                         | I   | Lipid transport and metabolism                                |
| fam2_je | VC_A0689  | No duplication | No  | No hit  |                                                                                             |     |                                                               |
| fam2_jd | VC_A0690  | No duplication | No  | COG0183 | Acetyl-CoA acetyltransferase                                                                | I   | Lipid transport and metabolism                                |
| fam2_jc | VC_A0691  | No duplication | No  | COG1028 | Dehydrogenases with different specificities (related to short-chain alcohol dehydrogenases) | IQR | Multiple classes                                              |
| fam1_lo | VC_A0693  | Duplication    | No  | COG0342 | Preprotein translocase subunit SecD                                                         | U   | Intracellular trafficking, secretion, and vesicular transport |
| fam2_jb | VC_A0695  | No duplication | No  | No hit  |                                                                                             |     |                                                               |
| fam1_dd | VC_A0697  | Duplication    | No  | COG2199 | FOG: GGDEF domain                                                                           | T   | Signal transduction mechanisms                                |
| fam2_ja | VC_A0699  | No duplication | No  | COG0448 | ADP-glucose pyrophosphorylase                                                               | G   | Carbohydrate transport and metabolism                         |
| fam1_af | VC_A0700* | Duplication    | HGT | COG3325 | Chitinase                                                                                   | G   | Carbohydrate transport and metabolism                         |
| fam1_af | VC_A0700* | Duplication    | HGT | COG3979 | Uncharacterized protein contain chitin-binding domain type 3                                | R   | General function prediction only                              |
| fam1_fr | VC_A0702  | Duplication    | No  | COG1979 | Uncharacterized oxidoreductases, Fe-dependent alcohol dehydrogenase family                  | C   | Energy production and conversion                              |
| fam1_fq | VC_A0703  | Duplication    | No  | COG3714 | Predicted membrane protein                                                                  | S   | Function unknown                                              |
| fam1_cn | VC_A0704  | Duplication    | No  | COG2204 | Response regulator containing CheY-like receiver, AAA-type ATPase, and DNA-binding domains  | T   | Signal transduction mechanisms                                |
| fam1_da | VC_A0705  | Duplication    | No  | COG4192 | Signal transduction histidine kinase regulating phosphoglycerate transport system           | T   | Signal transduction mechanisms                                |
| fam1_fp | VC_A0706  | Duplication    | HGT | COG1840 | ABC-type Fe3+ transport system, periplasmic component                                       | P   | Inorganic ion transport and metabolism                        |
| fam1_fo | VC_A0707  | Duplication    | No  | COG2271 | Sugar phosphate permease                                                                    | G   | Carbohydrate transport and metabolism                         |
| fam1_fn | VC_A0708  | Duplication    | HGT | COG0469 | Pyruvate kinase                                                                             | G   | Carbohydrate transport and metabolism                         |
| fam2_ir | VC_A0711  | No duplication | No  | COG1803 | Methylglyoxal synthase                                                                      | G   | Carbohydrate transport and metabolism                         |
| fam1_lm | VC_A0712  | Duplication    | No  | COG1335 | Amidases related to nicotinamidase                                                          | Q   | Secondary metabolites biosynthesis, transport and catabolism  |
| fam2_iq | VC_A0714  | No duplication | HGT | COG0818 | Diacylglycerol kinase                                                                       | M   | Cell wall/membrane/envelope biogenesis                        |
| fam2_io | VC_A0717  | No duplication | No  | COG0210 | Superfamily I DNA and RNA helicases                                                         | L   | Replication, recombination and repair                         |
| fam2_in | VC_A0718  | No duplication | No  | COG1289 | Predicted membrane protein                                                                  | S   | Function unknown                                              |
| fam2_im | VC_A0721  | No duplication | No  | No hit  |                                                                                             |     |                                                               |
| fam2_il | VC_A0722  | No duplication | No  | No hit  |                                                                                             |     |                                                               |
| fam2_ik | VC_A0723  | No duplication | No  | COG1257 | Hydroxymethylglutaryl-CoA reductase                                                         | I   | Lipid transport and metabolism                                |
| fam2_ji | VC_A0724  | No duplication | No  | COG4148 | ABC-type molybdate transport system, ATPase component                                       | P   | Inorganic ion transport and metabolism                        |
| fam2_ii | VC_A0726  | No duplication | No  | COG0725 | ABC-type molybdate transport system, periplasmic component                                  | P   | Inorganic ion transport and metabolism                        |
| fam2_jg | VC_A0727  | No duplication | No  | COG1492 | Cobyrinic acid synthase                                                                     | H   | Coenzyme transport and metabolism                             |
| fam2_if | VC_A0732  | No duplication | No  | COG3111 | Uncharacterized conserved protein                                                           | S   | Function unknown                                              |
| fam2_ie | VC_A0734  | No duplication | No  | No hit  |                                                                                             |     |                                                               |
| fam2_id | VC_A0735  | No duplication | No  | No hit  |                                                                                             |     |                                                               |
| fam1_dc | VC_A0736* | Duplication    | No  | COG0642 | Signal transduction histidine kinase                                                        | T   | Signal transduction mechanisms                                |
| fam1_dc | VC_A0736* | Duplication    | No  | COG0784 | FOG: CheY-like receiver                                                                     | T   | Signal transduction mechanisms                                |
| fam2_ic | VC_A0737  | No duplication | No  | COG1879 | ABC-type sugar transport system, periplasmic component                                      | G   | Carbohydrate transport and metabolism                         |
| fam1_ii | VC_A0738  | Duplication    | No  | No hit  |                                                                                             |     |                                                               |
| fam2_ib | VC_A0740  | No duplication | No  | COG3132 | Uncharacterized protein conserved in bacteria                                               | S   | Function unknown                                              |
| fam2_ia | VC_A0741  | No duplication | No  | COG2926 | Uncharacterized protein conserved in bacteria                                               | S   | Function unknown                                              |
| fam2_hz | VC_A0743  | No duplication | No  | No hit  |                                                                                             |     |                                                               |
| fam2_hy | VC_A0744  | No duplication | No  | COG0554 | Glycerol kinase                                                                             | C   | Energy production and conversion                              |
| fam2_hx | VC_A0747  | No duplication | HGT | COG0578 | Glycerol-3-phosphate dehydrogenase                                                          | C   | Energy production and conversion                              |
| fam2_hw | VC_A0748  | No duplication | HGT | COG3075 | Anaerobic glycerol-3-phosphate dehydrogenase                                                | E   | Amino acid transport and metabolism                           |
| fam2_hv | VC_A0749  | No duplication | HGT | COG0247 | Fe-S oxidoreductase                                                                         | C   | Energy production and conversion                              |
| fam2_hu | VC_A0751  | No duplication | HGT | COG0332 | 3-oxoacyl-[acyl-carrier-protein] synthase III                                               | I   | Lipid transport and metabolism                                |
| fam2_ht | VC_A0752  | No duplication | HGT | COG3118 | Thioredoxin domain-containing protein                                                       | O   | Posttranslational modification, protein turnover, chaperones  |
| fam1_ge | VC_A0754  | Duplication    | HGT | COG3675 | Predicted lipase                                                                            | I   | Lipid transport and metabolism                                |
| fam2_hr | VC_A0758  | No duplication | HGT | COG4215 | ABC-type arginine transport system, permease component                                      | E   | Amino acid transport and metabolism                           |
| fam2_hq | VC_A0759  | No duplication | HGT | COG0834 | ABC-type amino acid transport/signal transduction systems, periplasmic component/domain     | ET  | Multiple classes                                              |
| fam2_hp | VC_A0760  | No duplication | No  | COG4161 | ABC-type arginine transport system, ATPase component                                        | E   | Amino acid transport and metabolism                           |
| fam1_db | VC_A0762  | Duplication    | No  | COG2425 | Uncharacterized protein containing a von Willebrand factor type A (vWA) domain              | R   | General function prediction only                              |
| fam1_lk | VC_A0763  | Duplication    | No  | COG0714 | MoxR-like ATPases                                                                           | R   | General function prediction only                              |
| fam2_ho | VC_A0764  | No duplication | No  | COG0494 | NTP pyrophosphohydrolases including oxidative damage repair enzymes                         | LR  | Multiple classes                                              |
| fam2_hn | VC_A0765  | No duplication | No  | COG2008 | Threonine aldolase                                                                          | E   | Amino acid transport and metabolism                           |
| fam2_hm | VC_A0766  | No duplication | No  | COG2863 | Cytochrome c553                                                                             | C   | Energy production and conversion                              |
| fam1_lj | VC_A0767  | Duplication    | No  | COG1309 | Transcriptional regulator                                                                   | K   | Transcription                                                 |
| fam2_hl | VC_A0768  | No duplication | No  | COG0513 | Superfamily II DNA and RNA helicases                                                        | LKJ | Multiple classes                                              |
| fam2_hi | VC_A0770  | No duplication | No  | No hit  |                                                                                             |     |                                                               |
| fam2_hh | VC_A0772  | No duplication | No  | COG0814 | Amino acid permeases                                                                        | E   | Amino acid transport and metabolism                           |
| fam2_hg | VC_A0773  | No duplication | No  | COG0840 | Methyl-accepting chemotaxis protein                                                         | NT  | Multiple classes                                              |
| fam2_hf | VC_A0774  | No duplication | No  | COG1087 | UDP-glucose 4-epimerase                                                                     | M   | Cell wall/membrane/envelope biogenesis                        |
| fam2_he | VC_A0776  | No duplication | No  | COG1540 | Uncharacterized proteins, homologs of lactam utilization protein B                          | R   | General function prediction only                              |
| fam2_hd | VC_A0777  | No duplication | No  | COG2049 | Allophanate hydrolase subunit 1                                                             | E   | Amino acid transport and metabolism                           |
| fam2_hc | VC_A0779  | No duplication | No  | COG0644 | Dehydrogenases (flavoproteins)                                                              | C   | Energy production and conversion                              |
| fam2_hb | VC_A0783  | No duplication | No  | COG2755 | Lysophospholipase L1 and related esterases                                                  | E   | Amino acid transport and metabolism                           |

Orata et al. Genetic Interactions Between *V. metoecus* and *V. cholerae*

|         |           |                |     |         |                                                                               |    |                                                               |
|---------|-----------|----------------|-----|---------|-------------------------------------------------------------------------------|----|---------------------------------------------------------------|
| fam2_ha | VC_A0784  | No duplication | No  | COG3007 | Uncharacterized paraquat-inducible protein B                                  | S  | Function unknown                                              |
| fam2_gz | VC_A0785* | No duplication | No  | COG2200 | FOG: EAL domain                                                               | T  | Signal transduction mechanisms                                |
| fam2_gz | VC_A0785* | No duplication | No  | COG2199 | FOG: GGDEF domain                                                             | T  | Signal transduction mechanisms                                |
| fam2_gz | VC_A0785* | No duplication | No  | COG2203 | FOG: GAF domain                                                               | T  | Signal transduction mechanisms                                |
| fam2_gy | VC_A0786  | No duplication | No  | COG3044 | Predicted ATPase of the ABC class                                             | R  | General function prediction only                              |
| fam2_gx | VC_A0788  | No duplication | No  | COG0484 | DnaJ-class molecular chaperone with C-terminal Zn finger domain               | O  | Posttranslational modification, protein turnover, chaperones  |
| fam2_gw | VC_A0789  | No duplication | No  | COG3647 | Predicted membrane protein                                                    | S  | Function unknown                                              |
| fam1_li | VC_A0798  | Duplication    | No  | COG0637 | Predicted phosphatase/phosphohexomutase                                       | R  | General function prediction only                              |
| fam2_gv | VC_A0799  | No duplication | No  | No hit  |                                                                               |    |                                                               |
| fam2_gu | VC_A0800  | No duplication | No  | COG3045 | Uncharacterized protein conserved in bacteria                                 | S  | Function unknown                                              |
| fam1_ar | VC_A0801  | Duplication    | HGT | COG0524 | Sugar kinases, ribokinase family                                              | G  | Carbohydrate transport and metabolism                         |
| fam2_gt | VC_A0803  | No duplication | HGT | COG5640 | Secreted trypsin-like serine protease                                         | O  | Posttranslational modification, protein turnover, chaperones  |
| fam2_gq | VC_A0809  | No duplication | No  | COG3046 | Uncharacterized protein related to deoxyribodipyrimidine photolyase           | R  | General function prediction only                              |
| fam2_gp | VC_A0811  | No duplication | No  | COG3397 | Uncharacterized protein conserved in bacteria                                 | S  | Function unknown                                              |
| fam2_go | VC_A0817  | No duplication | No  | COG0668 | Small-conductance mechanosensitive channel                                    | M  | Cell wall/membrane/envelope biogenesis                        |
| fam1_bc | VC_A0820  | Duplication    | HGT | COG0459 | Chaperonin GroEL (HSP60 family)                                               | O  | Posttranslational modification, protein turnover, chaperones  |
| fam2_gn | VC_A0827  | No duplication | No  | COG2154 | Pterin-4a-carbinolamine dehydratase                                           | H  | Coenzyme transport and metabolism                             |
| fam2_gm | VC_A0828  | No duplication | No  | COG3186 | Phenylalanine-4-hydroxylase                                                   | E  | Amino acid transport and metabolism                           |
| fam1_ig | VC_A0829  | Duplication    | No  | COG0365 | Acyl-coenzyme A synthetases/AMP-(fatty) acid ligases                          | I  | Lipid transport and metabolism                                |
| fam5_fe | VC_A0833  | No duplication | No  | COG0583 | Transcriptional regulator                                                     | K  | Transcription                                                 |
| fam5_fd | VC_A0834  | No duplication | No  | COG3965 | Predicted Co/Zn/Cd cation transporters                                        | P  | Inorganic ion transport and metabolism                        |
| fam2_gl | VC_A0835  | No duplication | No  | No hit  |                                                                               |    |                                                               |
| fam2_gk | VC_A0836  | No duplication | No  | COG0110 | Acetyltransferase (isoleucine patch superfamily)                              | R  | General function prediction only                              |
| fam2_gj | VC_A0837  | No duplication | No  | COG1253 | Hemolysins and related proteins containing CBS domains                        | R  | General function prediction only                              |
| fam2_gi | VC_A0838  | No duplication | No  | COG1765 | Predicted redox protein, regulator of disulfide bond formation                | O  | Posttranslational modification, protein turnover, chaperones  |
| fam2_gh | VC_A0840  | No duplication | No  | COG2131 | Deoxycytidylate deaminase                                                     | F  | Nucleotide transport and metabolism                           |
| fam2_gg | VC_A0843  | No duplication | No  | COG0057 | Glyceraldehyde-3-phosphate dehydrogenase/erythrose-4-phosphate dehydrogenase  | G  | Carbohydrate transport and metabolism                         |
| fam2_gf | VC_A0846  | No duplication | HGT | COG1280 | Putative threonine efflux protein                                             | E  | Amino acid transport and metabolism                           |
| fam2_ge | VC_A0847  | No duplication | No  | COG0531 | Amino acid transporters                                                       | E  | Amino acid transport and metabolism                           |
| fam1_bq | VC_A0849  | Duplication    | No  | No hit  |                                                                               |    |                                                               |
| fam1_gd | VC_A0859  | Duplication    | No  | COG4989 | Predicted oxidoreductase                                                      | R  | General function prediction only                              |
| fam2_gb | VC_A0860  | No duplication | No  | COG0366 | Glycosidases                                                                  | G  | Carbohydrate transport and metabolism                         |
| fam1_if | VC_A0862  | Duplication    | No  | COG2067 | Long-chain fatty acid transport protein                                       | I  | Lipid transport and metabolism                                |
| fam2_fz | VC_A0863  | No duplication | No  | No hit  |                                                                               |    |                                                               |
| fam2_fy | VC_A0865  | No duplication | No  | COG3227 | Zinc metalloprotease (elastase)                                               | E  | Amino acid transport and metabolism                           |
| fam2_fx | VC_A0867  | No duplication | No  | COG3047 | Outer membrane protein W                                                      | M  | Cell wall/membrane/envelope biogenesis                        |
| fam2_fw | VC_A0868  | No duplication | No  | No hit  |                                                                               |    |                                                               |
| fam2_fv | VC_A0870  | No duplication | No  | COG1686 | D-alanyl-D-alanine carboxypeptidase                                           | M  | Cell wall/membrane/envelope biogenesis                        |
| fam2_fm | VC_A0885  | No duplication | HGT | COG1063 | Threonine dehydrogenase and related Zn-dependent dehydrogenases               | ER | Multiple classes                                              |
| fam2_fl | VC_A0886  | No duplication | HGT | COG0156 | 7-keto-8-aminopelargonate synthetase and related enzymes                      | H  | Coenzyme transport and metabolism                             |
| fam2_fk | VC_A0889  | No duplication | HGT | COG0583 | Transcriptional regulator                                                     | K  | Transcription                                                 |
| fam2_fj | VC_A0890  | No duplication | HGT | COG0346 | Lactoylglutathione lyase and related lyases                                   | E  | Amino acid transport and metabolism                           |
| fam2_fi | VC_A0891  | No duplication | HGT | COG3182 | Uncharacterized iron-regulated membrane protein                               | S  | Function unknown                                              |
| fam2_fh | VC_A0892  | No duplication | HGT | No hit  |                                                                               |    |                                                               |
| fam2_fg | VC_A0894  | No duplication | No  | COG1387 | Histidinol phosphatase and related hydrolases of the PHP family               | ER | Multiple classes                                              |
| fam1_le | VC_A0895  | Duplication    | HGT | COG2206 | HD-GYP domain                                                                 | T  | Signal transduction mechanisms                                |
| fam1_kg | VC_A0896  | Duplication    | No  | COG0364 | Glucose-6-phosphate 1-dehydrogenase                                           | G  | Carbohydrate transport and metabolism                         |
| fam1_fi | VC_A0897  | Duplication    | HGT | COG0363 | 6-phosphogluconolactonase/Glucosamine-6-phosphate isomerase/deaminase         | G  | Carbohydrate transport and metabolism                         |
| fam1_cz | VC_A0898  | Duplication    | HGT | COG0362 | 6-phosphogluconate dehydrogenase                                              | G  | Carbohydrate transport and metabolism                         |
| fam5_ey | VC_A0901  | No duplication | No  | COG3531 | Predicted protein-disulfide isomerase                                         | O  | Posttranslational modification, protein turnover, chaperones  |
| fam2_ff | VC_A0902  | No duplication | No  | No hit  |                                                                               |    |                                                               |
| fam2_fd | VC_A0903  | No duplication | No  | COG1929 | Glycerate kinase                                                              | G  | Carbohydrate transport and metabolism                         |
| fam2_fc | VC_A0906  | No duplication | No  | COG0840 | Methyl-accepting chemotaxis protein                                           | NT | Multiple classes                                              |
| fam2_fb | VC_A0908  | No duplication | HGT | COG3721 | Putative heme iron utilization protein                                        | P  | Inorganic ion transport and metabolism                        |
| fam2_fa | VC_A0909  | No duplication | No  | COG0635 | Coproporphyrinogen III oxidase and related Fe-S oxidoreductases               | H  | Coenzyme transport and metabolism                             |
| fam2_ez | VC_A0910  | No duplication | No  | COG0810 | Periplasmic protein TonB, links inner and outer membranes                     | M  | Cell wall/membrane/envelope biogenesis                        |
| fam2_ey | VC_A0911  | No duplication | No  | COG0811 | Biopolymer transport proteins                                                 | U  | Intracellular trafficking, secretion, and vesicular transport |
| fam2_ex | VC_A0914  | No duplication | No  | COG0609 | ABC-type Fe3+-siderophore transport system, permease component                | P  | Inorganic ion transport and metabolism                        |
| fam2_ew | VC_A0917  | No duplication | No  | COG1309 | Transcriptional regulator                                                     | K  | Transcription                                                 |
| fam2_ev | VC_A0919  | No duplication | No  | COG3691 | Uncharacterized protein conserved in bacteria                                 | S  | Function unknown                                              |
| fam2_eu | VC_A0920  | No duplication | No  | No hit  |                                                                               |    |                                                               |
| fam2_et | VC_A0921  | No duplication | No  | COG0204 | 1-acyl-sn-glycerol-3-phosphate acyltransferase                                | I  | Lipid transport and metabolism                                |
| fam2_es | VC_A0922  | No duplication | No  | No hit  |                                                                               |    |                                                               |
| fam1_ad | VC_A0923  | Duplication    | HGT | COG0840 | Methyl-accepting chemotaxis protein                                           | NT | Multiple classes                                              |
| fam2_er | VC_A0924* | No duplication | No  | COG3217 | Uncharacterized Fe-S protein                                                  | R  | General function prediction only                              |
| fam2_er | VC_A0924* | No duplication | No  | COG1018 | Flavodoxin reductases (ferredoxin-NADPH reductases) family 1                  | C  | Energy production and conversion                              |
| fam2_ep | VC_A0925  | No duplication | HGT | COG0418 | Dihydroorotase                                                                | F  | Nucleotide transport and metabolism                           |
| fam2_eo | VC_A0929  | No duplication | HGT | COG2265 | SAM-dependent methyltransferases related to tRNA (uracil-5)-methyltransferase | J  | Translation, ribosomal structure and biogenesis               |

Orata et al. Genetic Interactions Between *V. metoecus* and *V. cholerae*

|         |           |                |     |         |                                                                                            |     |                                                              |
|---------|-----------|----------------|-----|---------|--------------------------------------------------------------------------------------------|-----|--------------------------------------------------------------|
| fam2_en | VC_A0930  | No duplication | No  | COG2354 | Uncharacterized protein conserved in bacteria                                              | S   | Function unknown                                             |
| fam2_em | VC_A0931  | No duplication | No  | COG2206 | HD-GYP domain                                                                              | T   | Signal transduction mechanisms                               |
| fam2_el | VC_A0933  | No duplication | No  | COG1278 | Cold shock proteins                                                                        | K   | Transcription                                                |
| fam2_ek | VC_A0936  | No duplication | No  | COG3608 | Predicted deacylase                                                                        | R   | General function prediction only                             |
| fam2_ei | VC_A0937  | No duplication | No  | COG2207 | AraC-type DNA-binding domain-containing proteins                                           | K   | Transcription                                                |
| fam2_eh | VC_A0939  | No duplication | No  | COG2199 | FOG: GGDEF domain                                                                          | T   | Signal transduction mechanisms                               |
| fam2_eg | VC_A0940  | No duplication | No  | COG1349 | Transcriptional regulators of sugar metabolism                                             | KG  | Multiple classes                                             |
| fam2_ef | VC_A0941  | No duplication | No  | COG1607 | Acyl-CoA hydrolase                                                                         | I   | Lipid transport and metabolism                               |
| fam2_ee | VC_A0943  | No duplication | No  | COG3833 | ABC-type maltose transport systems, permease component                                     | G   | Carbohydrate transport and metabolism                        |
| fam2_ed | VC_A0944  | No duplication | No  | COG1175 | ABC-type sugar transport systems, permease components                                      | G   | Carbohydrate transport and metabolism                        |
| fam2_ec | VC_A0945  | No duplication | No  | COG2182 | Maltose-binding periplasmic proteins/domains                                               | G   | Carbohydrate transport and metabolism                        |
| fam2_eb | VC_A0946  | No duplication | No  | COG3839 | ABC-type sugar transport systems, ATPase components                                        | G   | Carbohydrate transport and metabolism                        |
| fam2_ea | VC_A0947  | No duplication | No  | COG1670 | Acetyltransferases, including N-acetylases of ribosomal proteins                           | J   | Translation, ribosomal structure and biogenesis              |
| fam2_dz | VC_A0948  | No duplication | No  | COG4568 | Transcriptional antiterminator                                                             | K   | Transcription                                                |
| fam2_dy | VC_A0949  | No duplication | No  | COG3751 | Predicted proline hydroxylase                                                              | O   | Posttranslational modification, protein turnover, chaperones |
| fam2_dx | VC_A0951  | No duplication | No  | COG0393 | Uncharacterized conserved protein                                                          | S   | Function unknown                                             |
| fam2_dw | VC_A0952  | No duplication | No  | COG2197 | Response regulator containing a CheY-like receiver domain and an HTH DNA-binding domain    | TK  | Multiple classes                                             |
| fam2_dv | VC_A0953  | No duplication | No  | COG0760 | Parvulin-like peptidyl-prolyl isomerase                                                    | O   | Posttranslational modification, protein turnover, chaperones |
| fam2_du | VC_A0955  | No duplication | No  | COG1846 | Transcriptional regulators                                                                 | K   | Transcription                                                |
| fam2_dt | VC_A0956  | No duplication | No  | COG2199 | FOG: GGDEF domain                                                                          | T   | Signal transduction mechanisms                               |
| fam2_ds | VC_A0957  | No duplication | No  | COG2225 | Malate synthase                                                                            | C   | Energy production and conversion                             |
| fam2_dq | VC_A0958  | No duplication | No  | COG1396 | Predicted transcriptional regulators                                                       | K   | Transcription                                                |
| fam1_ga | VC_A0961  | Duplication    | No  | COG3145 | Alkylated DNA repair protein                                                               | L   | Replication, recombination and repair                        |
| fam2_dp | VC_A0962  | No duplication | No  | No hit  |                                                                                            |     |                                                              |
| fam2_do | VC_A0963  | No duplication | No  | No hit  |                                                                                            |     |                                                              |
| fam2_dn | VC_A0964  | No duplication | No  | COG0583 | Transcriptional regulator                                                                  | K   | Transcription                                                |
| fam2_dm | VC_A0965  | No duplication | No  | COG2199 | FOG: GGDEF domain                                                                          | T   | Signal transduction mechanisms                               |
| fam2_dl | VC_A0966  | No duplication | No  | No hit  |                                                                                            |     |                                                              |
| fam2_dk | VC_A0969  | No duplication | No  | COG1741 | Pirin-related protein                                                                      | R   | General function prediction only                             |
| fam2_dj | VC_A0970  | No duplication | No  | COG3123 | Uncharacterized protein conserved in bacteria                                              | S   | Function unknown                                             |
| fam2_di | VC_A0971  | No duplication | No  | No hit  |                                                                                            |     |                                                              |
| fam1_lb | VC_A0972  | Duplication    | No  | COG2271 | Sugar phosphate permease                                                                   | G   | Carbohydrate transport and metabolism                        |
| fam1_eh | VC_A0975  | Duplication    | No  | COG1067 | Predicted ATP-dependent protease                                                           | O   | Posttranslational modification, protein turnover, chaperones |
| fam1_ei | VC_A0976  | Duplication    | No  | No hit  |                                                                                            |     |                                                              |
| fam1_ae | VC_A0977  | Duplication    | HGT | COG4172 | ABC-type uncharacterized transport system, duplicated ATPase component                     | R   | General function prediction only                             |
| fam1_cs | VC_A0982  | Duplication    | HGT | COG0583 | Transcriptional regulator                                                                  | K   | Transcription                                                |
| fam1_ej | VC_A0983  | Duplication    | HGT | COG1620 | L-lactate permease                                                                         | C   | Energy production and conversion                             |
| fam2_dh | VC_A0984  | No duplication | HGT | COG1304 | L-lactate dehydrogenase (FMN-dependent) and related alpha-hydroxy acid dehydrogenases      | C   | Energy production and conversion                             |
| fam1_dh | VC_A0985* | Duplication    | HGT | COG0277 | FAD/FMN-containing dehydrogenases                                                          | C   | Energy production and conversion                             |
| fam1_dh | VC_A0985* | Duplication    | HGT | COG0247 | Fe-S oxidoreductase                                                                        | C   | Energy production and conversion                             |
| fam1_bt | VC_A0988  | Duplication    | No  | COG0840 | Methyl-accepting chemotaxis protein                                                        | NT  | Multiple classes                                             |
| fam1_ew | VC_A0989  | Duplication    | No  | COG0534 | Na <sup>+</sup> -driven multidrug efflux pump                                              | V   | Defense mechanisms                                           |
| fam1_ex | VC_A0990  | Duplication    | HGT | COG0513 | Superfamily II DNA and RNA helicases                                                       | LKJ | Multiple classes                                             |
| fam2_dg | VC_A0994  | No duplication | HGT | COG4874 | Uncharacterized protein conserved in bacteria containing a pectin-type domain              | S   | Function unknown                                             |
| fam1_ax | VC_A0996  | Duplication    | HGT | COG1132 | ABC-type multidrug transport system, ATPase and permease components                        | V   | Defense mechanisms                                           |
| fam2_df | VC_A0997  | No duplication | HGT | No hit  |                                                                                            |     |                                                              |
| fam1_fz | VC_A0998  | Duplication    | HGT | COG1902 | NADH:flavin oxidoreductases, Old Yellow Enzyme family                                      | C   | Energy production and conversion                             |
| fam5_en | VC_A0999  | No duplication | HGT | COG1309 | Transcriptional regulator                                                                  | K   | Transcription                                                |
| fam2_dd | VC_A1000  | No duplication | HGT | COG1280 | Putative threonine efflux protein                                                          | E   | Amino acid transport and metabolism                          |
| fam2_dc | VC_A1001  | No duplication | HGT | COG2207 | AraC-type DNA-binding domain-containing proteins                                           | K   | Transcription                                                |
| fam2_db | VC_A1002  | No duplication | HGT | COG1296 | Predicted branched-chain amino acid permease (azaleucine resistance)                       | E   | Amino acid transport and metabolism                          |
| fam2_da | VC_A1003  | No duplication | HGT | COG4392 | Predicted membrane protein                                                                 | S   | Function unknown                                             |
| fam2_cz | VC_A1004  | No duplication | HGT | COG0179 | 2-keto-4-pentenoate hydratase/2-oxohepta-3-ene-1,7-dioic acid hydratase (catechol pathway) | Q   | Secondary metabolites biosynthesis, transport and catabolism |
| fam2_cy | VC_A1005  | No duplication | No  | COG1846 | Transcriptional regulators                                                                 | K   | Transcription                                                |
| fam2_cx | VC_A1006  | No duplication | HGT | COG1764 | Predicted redox protein, regulator of disulfide bond formation                             | O   | Posttranslational modification, protein turnover, chaperones |
| fam2_cw | VC_A1008  | No duplication | No  | COG3203 | Outer membrane protein (porin)                                                             | M   | Cell wall/membrane/envelope biogenesis                       |
| fam2_cv | VC_A1010  | No duplication | No  | COG0697 | Permeases of the drug/metabolite transporter (DMT) superfamily                             | GER | Multiple classes                                             |
| fam2_cu | VC_A1011  | No duplication | No  | COG0695 | Glutaredoxin and related proteins                                                          | O   | Posttranslational modification, protein turnover, chaperones |
| fam2_ct | VC_A1013  | No duplication | No  | COG3314 | Uncharacterized protein conserved in bacteria                                              | S   | Function unknown                                             |
| fam2_cs | VC_A1015  | No duplication | No  | COG1055 | Na <sup>+</sup> /H <sup>+</sup> antiporter NhaD and related arsenite permeases             | P   | Inorganic ion transport and metabolism                       |
| fam2_cr | VC_A1016  | No duplication | No  | No hit  |                                                                                            |     |                                                              |
| fam2_cq | VC_A1017  | No duplication | No  | COG0350 | Methylated DNA-protein cysteine methyltransferase                                          | L   | Replication, recombination and repair                        |
| fam2_cp | VC_A1018* | No duplication | No  | COG2169 | Adenosine deaminase                                                                        | F   | Nucleotide transport and metabolism                          |
| fam2_cp | VC_A1018* | No duplication | No  | COG0122 | 3-methyladenine DNA glycosylase/8-oxoguanine DNA glycosylase                               | L   | Replication, recombination and repair                        |
| fam2_co | VC_A1019  | No duplication | No  | COG2259 | Predicted membrane protein                                                                 | S   | Function unknown                                             |
| fam2_cn | VC_A1020  | No duplication | No  | COG0583 | Transcriptional regulator                                                                  | K   | Transcription                                                |
| fam2_cm | VC_A1021  | No duplication | No  | COG3085 | Uncharacterized protein conserved in bacteria                                              | S   | Function unknown                                             |
| fam2_cl | VC_A1023  | No duplication | No  | COG3930 | Uncharacterized protein conserved in bacteria                                              | S   | Function unknown                                             |

Orata et al. Genetic Interactions Between *V. metoecus* and *V. cholerae*

|         |           |                |     |         |                                                                                                   |    |                                                            |
|---------|-----------|----------------|-----|---------|---------------------------------------------------------------------------------------------------|----|------------------------------------------------------------|
| fam2_ck | VC_A1024  | No duplication | No  | No hit  |                                                                                                   |    |                                                            |
| fam2_cj | VC_A1025  | No duplication | No  | COG0363 | 6-phosphogluconolactonase/Glucosamine-6-phosphate isomerase/deaminase                             | G  | Carbohydrate transport and metabolism                      |
| fam2_ci | VC_A1026  | No duplication | No  | COG0790 | FOG: TPR repeat, SEL1 subfamily                                                                   | R  | General function prediction only                           |
| fam2_ch | VC_A1027  | No duplication | HGT | No hit  |                                                                                                   |    |                                                            |
| fam1_fy | VC_A1029  | Duplication    | No  | COG1523 | Type II secretory pathway, pullulanase PulA and related glycosidases                              | G  | Carbohydrate transport and metabolism                      |
| fam2_cg | VC_A1030  | No duplication | No  | No hit  |                                                                                                   |    |                                                            |
| fam2_cf | VC_A1033  | No duplication | No  | COG1653 | ABC-type sugar transport system, periplasmic component                                            | G  | Carbohydrate transport and metabolism                      |
| fam2_ce | VC_A1034  | No duplication | No  | COG0840 | Methyl-accepting chemotaxis protein                                                               | NT | Multiple classes                                           |
| fam2_cd | VC_A1035  | No duplication | No  | No hit  |                                                                                                   |    |                                                            |
| fam2_cc | VC_A1037  | No duplication | HGT | COG1126 | ABC-type polar amino acid transport system, ATPase component                                      | E  | Amino acid transport and metabolism                        |
| fam2_cb | VC_A1038  | No duplication | HGT | COG0765 | ABC-type amino acid transport system, permease component                                          | E  | Amino acid transport and metabolism                        |
| fam1_la | VC_A1039  | Duplication    | HGT | COG0834 | ABC-type amino acid transport/signal transduction systems, periplasmic component/domain           | ET | Multiple classes                                           |
| fam2_ca | VC_A1040  | No duplication | HGT | COG0765 | ABC-type amino acid transport system, permease component                                          | E  | Amino acid transport and metabolism                        |
| fam2_bz | VC_A1041  | No duplication | HGT | COG1109 | Phosphomannomutase                                                                                | G  | Carbohydrate transport and metabolism                      |
| fam2_by | VC_A1048  | No duplication | HGT | COG0673 | Predicted dehydrogenases and related proteins                                                     | R  | General function prediction only                           |
| fam2_bx | VC_A1050  | No duplication | HGT | No hit  |                                                                                                   |    |                                                            |
| fam2_bw | VC_A1051  | No duplication | HGT | COG3304 | Predicted membrane protein                                                                        | S  | Function unknown                                           |
| fam2_bv | VC_A1052  | No duplication | HGT | COG0730 | Predicted permeases                                                                               | R  | General function prediction only                           |
| fam2_bu | VC_A1053  | No duplication | HGT | COG0607 | Rhodanese-related sulfurtransferase                                                               | P  | Inorganic ion transport and metabolism                     |
| fam2_bt | VC_A1054  | No duplication | HGT | COG2910 | Putative NADH-flavin reductase                                                                    | R  | General function prediction only                           |
| fam2_bs | VC_A1055  | No duplication | HGT | COG0583 | Transcriptional regulator                                                                         | K  | Transcription                                              |
| fam2_bp | VC_A1057  | No duplication | HGT | COG4221 | Short-chain alcohol dehydrogenase of unknown specificity                                          | R  | General function prediction only                           |
| fam1_kz | VC_A1058  | Duplication    | HGT | COG0583 | Transcriptional regulator                                                                         | K  | Transcription                                              |
| fam2_bo | VC_A1059  | No duplication | HGT | COG1901 | Uncharacterized conserved protein                                                                 | S  | Function unknown                                           |
| fam2_bn | VC_A1060  | No duplication | HGT | COG108  | 3,4-dihydroxy-2-butanone 4-phosphate synthase                                                     | H  | Coenzyme transport and metabolism                          |
| fam2_bm | VC_A1062  | No duplication | HGT | COG0531 | Amino acid transporters                                                                           | E  | Amino acid transport and metabolism                        |
| fam2_bl | VC_A1063  | No duplication | HGT | COG1982 | Arginine/lysine/ornithine decarboxylases                                                          | E  | Amino acid transport and metabolism                        |
| fam2_bj | VC_A1068  | No duplication | HGT | COG1522 | Transcriptional regulators                                                                        | K  | Transcription                                              |
| fam2_bi | VC_A1069  | No duplication | HGT | COG0840 | Methyl-accepting chemotaxis protein                                                               | NT | Multiple classes                                           |
| fam1_jw | VC_A1070  | Duplication    | HGT | No hit  |                                                                                                   |    |                                                            |
| fam2_bh | VC_A1071  | No duplication | HGT | COG0591 | Na+/proline symporter                                                                             | ER | Multiple classes                                           |
| fam2_bg | VC_A1072  | No duplication | HGT | COG4230 | Delta 1-pyrroline-5-carboxylate dehydrogenase                                                     | C  | Energy production and conversion                           |
| fam2_bf | VC_A1074  | No duplication | HGT | COG2207 | AraC-type DNA-binding domain-containing proteins                                                  | K  | Transcription                                              |
| fam2_be | VC_A1075  | No duplication | No  | COG1196 | Chromosome segregation ATPases                                                                    | D  | Cell cycle control, cell division, chromosome partitioning |
| fam2_bc | VC_A1078* | No duplication | No  | COG2771 | DNA-binding HTH domain-containing proteins                                                        | K  | Transcription                                              |
| fam2_bc | VC_A1078* | No duplication | No  | COG2202 | FOG: PAS/PAC domain                                                                               | T  | Signal transduction mechanisms                             |
| fam2_bb | VC_A1079  | No duplication | No  | COG0259 | Pyridoxamine-phosphate oxidase                                                                    | H  | Coenzyme transport and metabolism                          |
| fam1_ky | VC_A1080  | Duplication    | No  | COG1566 | Multidrug resistance efflux pump                                                                  | V  | Defense mechanisms                                         |
| fam2_ba | VC_A1081  | No duplication | No  | COG3672 | Predicted periplasmic protein                                                                     | S  | Function unknown                                           |
| fam1_dg | VC_A1082  | Duplication    | No  | COG2199 | FOG: GGDEF domain                                                                                 | T  | Signal transduction mechanisms                             |
| fam1_dg | VC_A1083  | Duplication    | No  | COG2200 | FOG: EAL domain                                                                                   | T  | Signal transduction mechanisms                             |
| fam2_az | VC_A1084  | No duplication | No  | COG2274 | ABC-type bacteriocin/lantibiotic exporters, contain an N-terminal double-glycine peptidase domain | V  | Defense mechanisms                                         |
| fam1_kx | VC_A1085  | Duplication    | No  | COG1315 | Predicted polymerase, most proteins contain PALM domain, HD hydrolase domain and Zn-ribon domain  | L  | Replication, recombination and repair                      |
| fam1_ee | VC_A1086* | Duplication    | No  | COG2208 | Serine phosphatase RsbU, regulator of sigma subunit                                               | TK | Multiple classes                                           |
| fam1_ee | VC_A1086* | Duplication    | No  | COG3437 | Response regulator containing a CheY-like receiver domain and an HD-GYP domain                    | KT | Multiple classes                                           |
| fam1_ed | VC_A1087  | Duplication    | No  | COG1366 | Anti-anti-sigma regulatory factor (antagonist of anti-sigma factor)                               | T  | Signal transduction mechanisms                             |
| fam1_ec | VC_A1088  | Duplication    | No  | COG0840 | Methyl-accepting chemotaxis protein                                                               | NT | Multiple classes                                           |
| fam2_ay | VC_A1090  | No duplication | No  | COG1871 | Chemotaxis protein; stimulates methylation of MCP proteins                                        | NT | Multiple classes                                           |
| fam2_ax | VC_A1091  | No duplication | No  | COG1352 | Methylase of chemotaxis methyl-accepting proteins                                                 | NT | Multiple classes                                           |
| fam2_aw | VC_A1092  | No duplication | No  | COG0840 | Methyl-accepting chemotaxis protein                                                               | NT | Multiple classes                                           |
| fam2_av | VC_A1094  | No duplication | No  | COG0835 | Chemotaxis signal transduction protein                                                            | NT | Multiple classes                                           |
| fam1_kw | VC_A1095  | Duplication    | No  | COG0643 | Chemotaxis protein histidine kinase and related kinases                                           | NT | Multiple classes                                           |
| fam2_au | VC_A1096  | No duplication | No  | COG2204 | Response regulator containing CheY-like receiver, AAA-type ATPase, and DNA-binding domains        | T  | Signal transduction mechanisms                             |
| fam2_at | VC_A1097  | No duplication | No  | COG1366 | Anti-anti-sigma regulatory factor (antagonist of anti-sigma factor)                               | T  | Signal transduction mechanisms                             |
| fam2_aq | VC_A1113  | No duplication | No  | COG0687 | Spermidine/putrescine-binding periplasmic protein                                                 | E  | Amino acid transport and metabolism                        |
| fam2_ap | VC_A1114  | No duplication | No  | COG1475 | Predicted transcriptional regulators                                                              | K  | Transcription                                              |
| fam2_ao | VC_A1115  | No duplication | No  | COG1192 | ATPases involved in chromosome partitioning                                                       | D  | Cell cycle control, cell division, chromosome partitioning |

\*Arbitrary gene family unique identifier

**Table S5**

HGT count for *V. metoecus* and *V. cholerae* strains based on 376 single-copy core genes with inferred HGT. An HGT event was hypothesized when a strain clustered with members of the other species in a phylogenetic tree, with reliable bootstrap support (>70%). Unequal variance *t*-test, *p* = 0.0053. Multiple *V. cholerae* YB strains from Oyster Pond (Massachusetts, USA) belong to the same clonal complex (CC), and only one strain from each clonal complex was included.

| Species            | Strain        | Classification       | HGT Count | % of Total |
|--------------------|---------------|----------------------|-----------|------------|
| <i>V. metoecus</i> | 07-2435       | Clinical             | 151       | 23.05      |
| <i>V. metoecus</i> | OP3H          | Environmental        | 55        | 8.40       |
| <i>V. metoecus</i> | 06-2478       | Clinical             | 48        | 7.33       |
| <i>V. metoecus</i> | YB4D01        | Environmental        | 43        | 6.56       |
| <i>V. metoecus</i> | 08-2459       | Clinical             | 38        | 5.80       |
| <i>V. metoecus</i> | YB5B06        | Environmental        | 37        | 5.65       |
| <i>V. metoecus</i> | 2010V-1005    | Clinical             | 31        | 4.73       |
| <i>V. metoecus</i> | YB5B04        | Environmental        | 30        | 4.58       |
| <i>V. metoecus</i> | RC341         | Environmental        | 29        | 4.43       |
| <i>V. metoecus</i> | YB9D03        | Environmental        | 27        | 4.12       |
| <i>V. cholerae</i> | V51           | non-O1/O139 clinical | 21        | 3.21       |
| <i>V. cholerae</i> | RC385         | Environmental        | 17        | 2.60       |
| <i>V. cholerae</i> | TMA21         | Environmental        | 16        | 2.44       |
| <i>V. cholerae</i> | YB2G01 (CC 5) | Environmental        | 16        | 2.44       |
| <i>V. cholerae</i> | MZO-2         | non-O1/O139 clinical | 10        | 1.53       |
| <i>V. cholerae</i> | YB4F05 (CC 3) | Environmental        | 9         | 1.37       |
| <i>V. cholerae</i> | 1587          | non-O1/O139 clinical | 8         | 1.22       |
| <i>V. cholerae</i> | 877-163       | Environmental        | 7         | 1.07       |
| <i>V. cholerae</i> | AM-19226      | non-O1/O139 clinical | 6         | 0.92       |
| <i>V. cholerae</i> | MAK757        | O1/O139 clinical     | 6         | 0.92       |
| <i>V. cholerae</i> | 2740-80       | Environmental        | 5         | 0.76       |
| <i>V. cholerae</i> | BX 330286     | Environmental        | 4         | 0.61       |
| <i>V. cholerae</i> | O395          | O1/O139 clinical     | 4         | 0.61       |
| <i>V. cholerae</i> | TM 11079-80   | Environmental        | 4         | 0.61       |
| <i>V. cholerae</i> | YB4B03 (CC 2) | Environmental        | 4         | 0.61       |
| <i>V. cholerae</i> | 12129(1)      | Environmental        | 3         | 0.46       |
| <i>V. cholerae</i> | 2010EL-1786   | O1/O139 clinical     | 3         | 0.46       |
| <i>V. cholerae</i> | CIRS101       | O1/O139 clinical     | 3         | 0.46       |
| <i>V. cholerae</i> | MJ-1236       | O1/O139 clinical     | 3         | 0.46       |
| <i>V. cholerae</i> | MO10          | O1/O139 clinical     | 3         | 0.46       |
| <i>V. cholerae</i> | N16961        | O1/O139 clinical     | 3         | 0.46       |
| <i>V. cholerae</i> | 623-39        | Environmental        | 2         | 0.31       |
| <i>V. cholerae</i> | MZO-3         | non-O1/O139 clinical | 2         | 0.31       |
| <i>V. cholerae</i> | V52           | non-O1/O139 clinical | 2         | 0.31       |
| <i>V. cholerae</i> | VL426         | Environmental        | 2         | 0.31       |
| <i>V. cholerae</i> | YB7A06 (CC 4) | Environmental        | 2         | 0.31       |
| <i>V. cholerae</i> | YB3B05 (CC 1) | Environmental        | 1         | 0.15       |

| Classification                          | HGT Count  | % of Total   |
|-----------------------------------------|------------|--------------|
| <i>V. metoecus</i> clinical             | 268        | 40.92        |
| <i>V. metoecus</i> environmental        | 221        | 33.74        |
|                                         | <b>489</b> | <b>74.66</b> |
| <i>V. cholerae</i> environmental        | 92         | 14.05        |
| <i>V. cholerae</i> non-O1/O139 clinical | 49         | 7.48         |
| <i>V. cholerae</i> O1/O139 clinical     | 25         | 3.82         |
|                                         | <b>166</b> | <b>25.34</b> |
| <b>Total Count</b>                      | <b>655</b> | <b>100</b>   |

# Orata et al. Genetic Interactions Between *V. metoecus* and *V. cholerae*

**Table S6**

ANI of the core genome of *V. cholerae* strains from Oyster Pond (Massachusetts, USA) based on the pairwise comparison of the 1,560 single-copy core genes ( $\approx 1.42$  mbp). The different clonal complexes are indicated by colour.

|   |        | Clonal Complex 1 |        |        | Clonal Complex 2 |        |        | Clonal Complex 3 |        |        |        |        | Clonal Complex 4 |        |        | Clonal Complex 5 |        |        |        |        |        |
|---|--------|------------------|--------|--------|------------------|--------|--------|------------------|--------|--------|--------|--------|------------------|--------|--------|------------------|--------|--------|--------|--------|--------|
|   |        | YB3B05           | YB4C07 | YB8E08 | YB2G07           | YB4B03 | YB4G05 | YB1G06           | YB2A05 | YB2G05 | YB4F05 | YB6A06 | YB7A09           | YB1A01 | YB5A06 | YB7A06           | YB2A06 | YB2G01 | YB3G04 | YB4G06 | YB4H02 |
| 1 | YB3B05 | 100              | 100    | 100    | 99               | 99     | 99     | 98               | 98     | 98     | 98     | 98     | 98               | 98     | 98     | 98               | 98     | 98     | 98     | 98     | 98     |
|   | YB4C07 | 100              | 100    | 100    | 99               | 99     | 99     | 98               | 98     | 98     | 98     | 98     | 98               | 98     | 98     | 98               | 98     | 98     | 98     | 98     | 98     |
|   | YB8E08 | 100              | 100    | 100    | 99               | 99     | 99     | 98               | 98     | 98     | 98     | 98     | 98               | 98     | 98     | 98               | 98     | 98     | 98     | 98     | 98     |
| 2 | YB2G07 | 99               | 99     | 99     | 100              | 100    | 100    | 98               | 98     | 98     | 98     | 98     | 98               | 98     | 98     | 98               | 98     | 98     | 98     | 98     | 98     |
|   | YB4B03 | 99               | 99     | 99     | 100              | 100    | 100    | 98               | 98     | 98     | 98     | 98     | 98               | 98     | 98     | 98               | 98     | 98     | 98     | 98     | 98     |
|   | YB4G05 | 99               | 99     | 99     | 100              | 100    | 100    | 98               | 98     | 98     | 98     | 98     | 98               | 98     | 98     | 98               | 98     | 98     | 98     | 98     | 98     |
| 3 | YB1G06 | 98               | 98     | 98     | 98               | 98     | 98     | 100              | 100    | 100    | 100    | 100    | 100              | 99     | 99     | 99               | 98     | 98     | 98     | 98     | 98     |
|   | YB2A05 | 98               | 98     | 98     | 98               | 98     | 98     | 100              | 100    | 100    | 100    | 100    | 100              | 99     | 99     | 99               | 98     | 98     | 98     | 98     | 98     |
|   | YB2G05 | 98               | 98     | 98     | 98               | 98     | 98     | 100              | 100    | 100    | 100    | 100    | 100              | 99     | 99     | 99               | 98     | 98     | 98     | 98     | 98     |
|   | YB4F05 | 98               | 98     | 98     | 98               | 98     | 98     | 100              | 100    | 100    | 100    | 100    | 100              | 99     | 99     | 99               | 98     | 98     | 98     | 98     | 98     |
|   | YB6A06 | 98               | 98     | 98     | 98               | 98     | 98     | 100              | 100    | 100    | 100    | 100    | 100              | 99     | 99     | 99               | 98     | 98     | 98     | 98     | 98     |
|   | YB7A09 | 98               | 98     | 98     | 98               | 98     | 98     | 100              | 100    | 100    | 100    | 100    | 100              | 99     | 99     | 99               | 98     | 98     | 98     | 98     | 98     |
| 4 | YB1A01 | 98               | 98     | 98     | 98               | 98     | 98     | 99               | 99     | 99     | 99     | 99     | 99               | 100    | 100    | 100              | 98     | 98     | 98     | 98     | 98     |
|   | YB5A06 | 98               | 98     | 98     | 98               | 98     | 98     | 99               | 99     | 99     | 99     | 99     | 99               | 100    | 100    | 100              | 98     | 98     | 98     | 98     | 98     |
|   | YB7A06 | 98               | 98     | 98     | 98               | 98     | 98     | 99               | 99     | 99     | 99     | 99     | 99               | 100    | 100    | 100              | 98     | 98     | 98     | 98     | 98     |
| 5 | YB2A06 | 98               | 98     | 98     | 98               | 98     | 98     | 98               | 98     | 98     | 98     | 98     | 98               | 98     | 98     | 98               | 100    | 100    | 100    | 100    | 100    |
|   | YB2G01 | 98               | 98     | 98     | 98               | 98     | 98     | 98               | 98     | 98     | 98     | 98     | 98               | 98     | 98     | 98               | 100    | 100    | 100    | 100    | 100    |
|   | YB3G04 | 98               | 98     | 98     | 98               | 98     | 98     | 98               | 98     | 98     | 98     | 98     | 98               | 98     | 98     | 98               | 100    | 100    | 100    | 100    | 100    |
|   | YB4G06 | 98               | 98     | 98     | 98               | 98     | 98     | 98               | 98     | 98     | 98     | 98     | 98               | 98     | 98     | 98               | 100    | 100    | 100    | 100    | 100    |
|   | YB4H02 | 98               | 98     | 98     | 98               | 98     | 98     | 98               | 98     | 98     | 98     | 98     | 98               | 98     | 98     | 98               | 100    | 100    | 100    | 100    | 100    |

**Legend:**

- Clonal complex 1
- Clonal complex 2
- Clonal complex 3
- Clonal complex 4
- Clonal complex 5

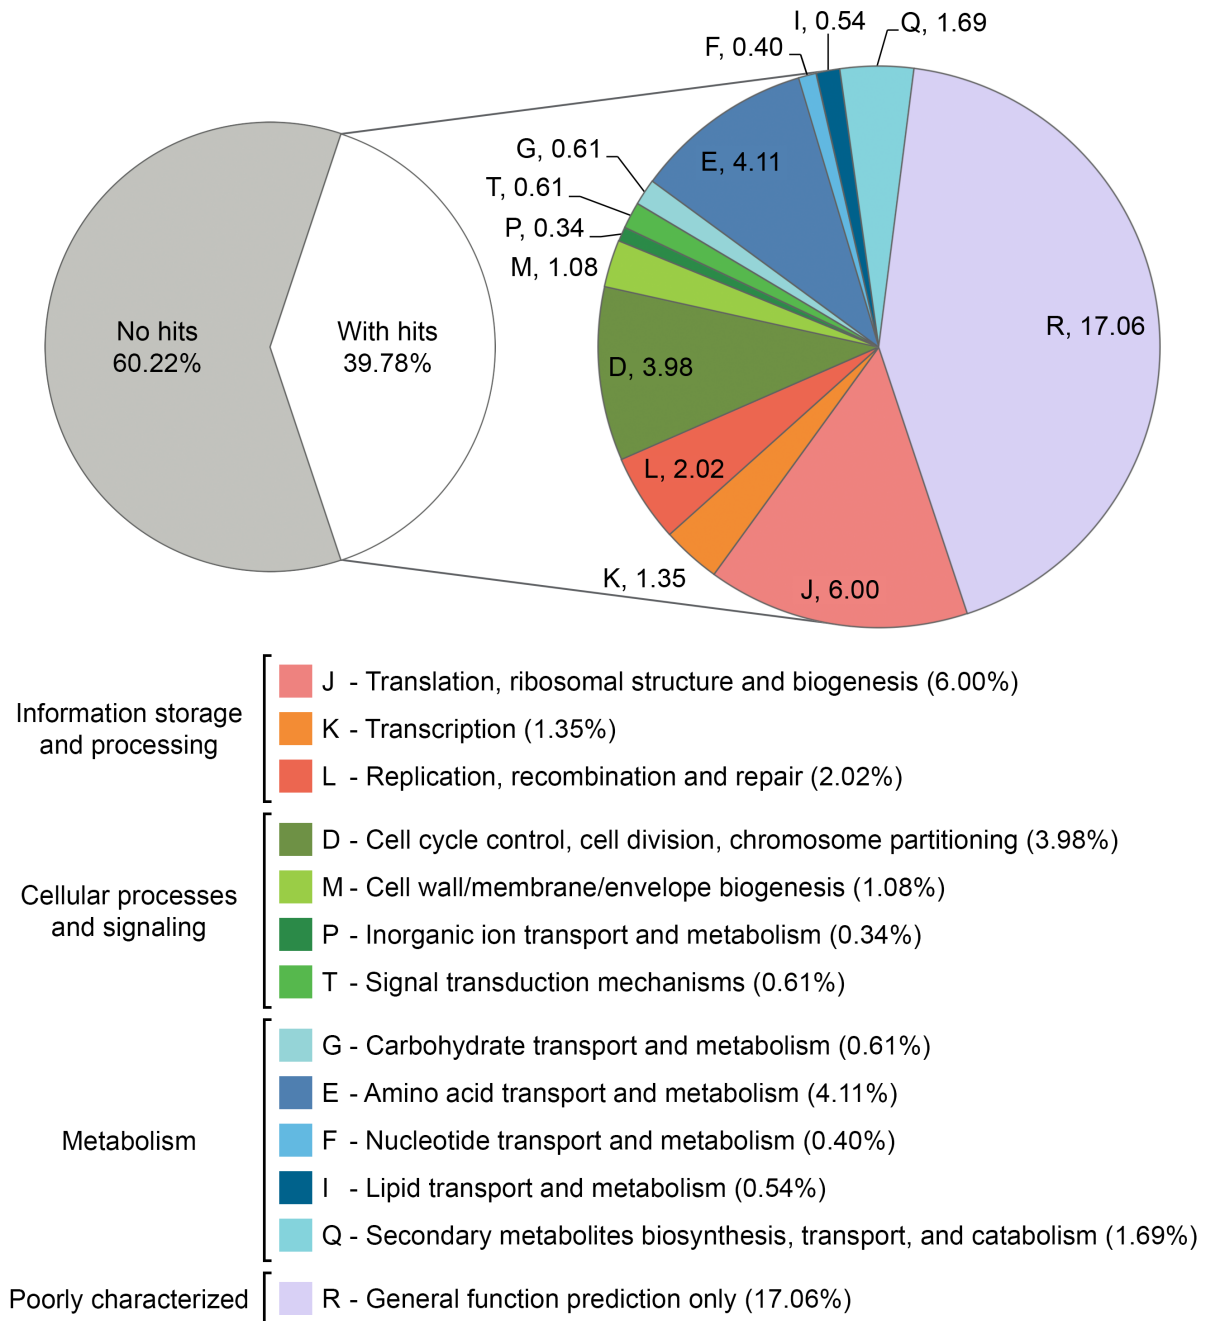

**Fig. S1.** – Predicted functional roles of the 1,452 *V. metoecus* and *V. cholerae* chromosomal integron gene cassettes from 116 gene families based on the COG database. The numbers on the pie chart represent percentage of genes in a category. Genes categorized as “function unknown” or not assigned into a COG category because there is no similarity to the database are combined (“no hits,” gray), whereas the genes with assigned COG categories (“with hits,” white) belong to four major groups: information storage and processing (reds), cellular processes and signaling (greens), metabolism (blues), and poorly characterized genes with general function prediction only (purple).



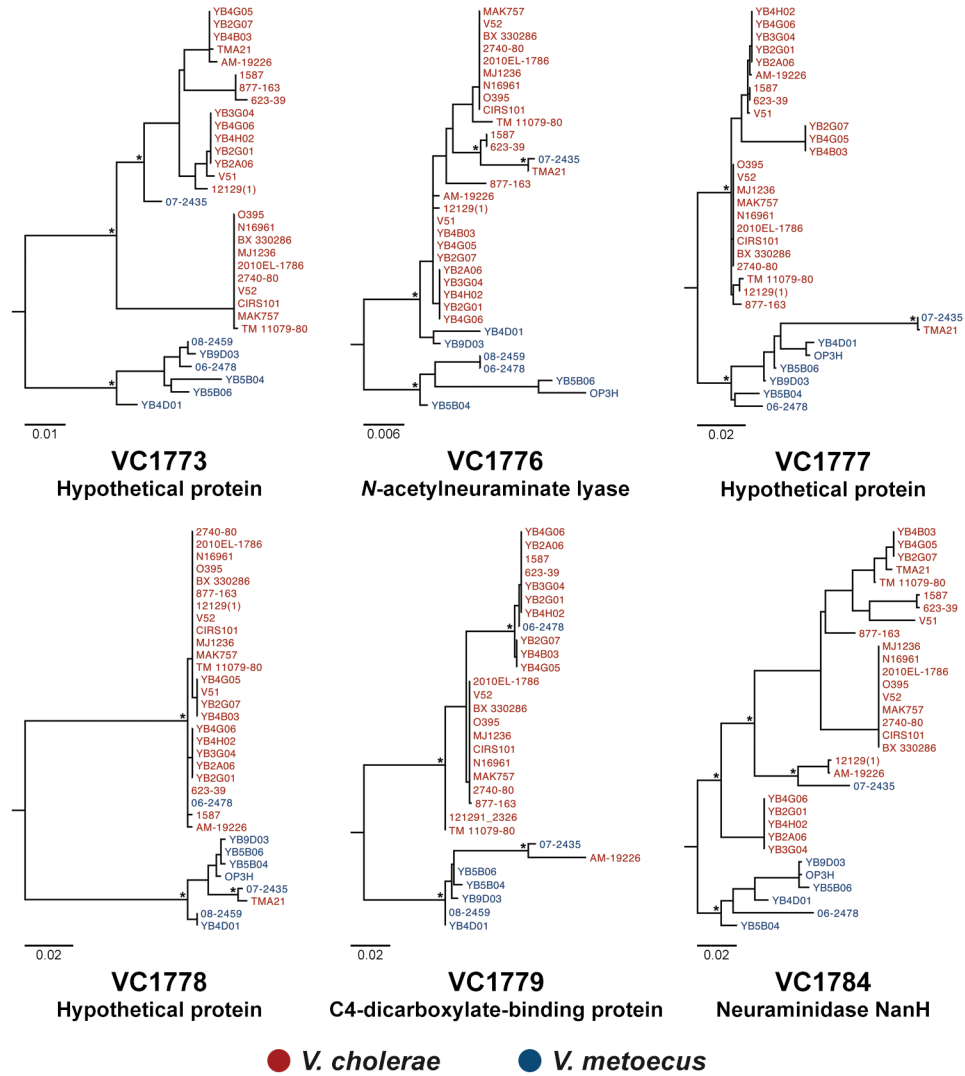

**Fig. S2.** – ML phylogenetic trees of orthologous gene families of islet B (*nan-nag* cluster, VC1773-VC1784) of the VPI-2 with reliable bootstrap support (6 out of 11 gene families). Relevant bootstrap support (>70%) is indicated with \*. The scale bars represent nucleotide substitutions per site.

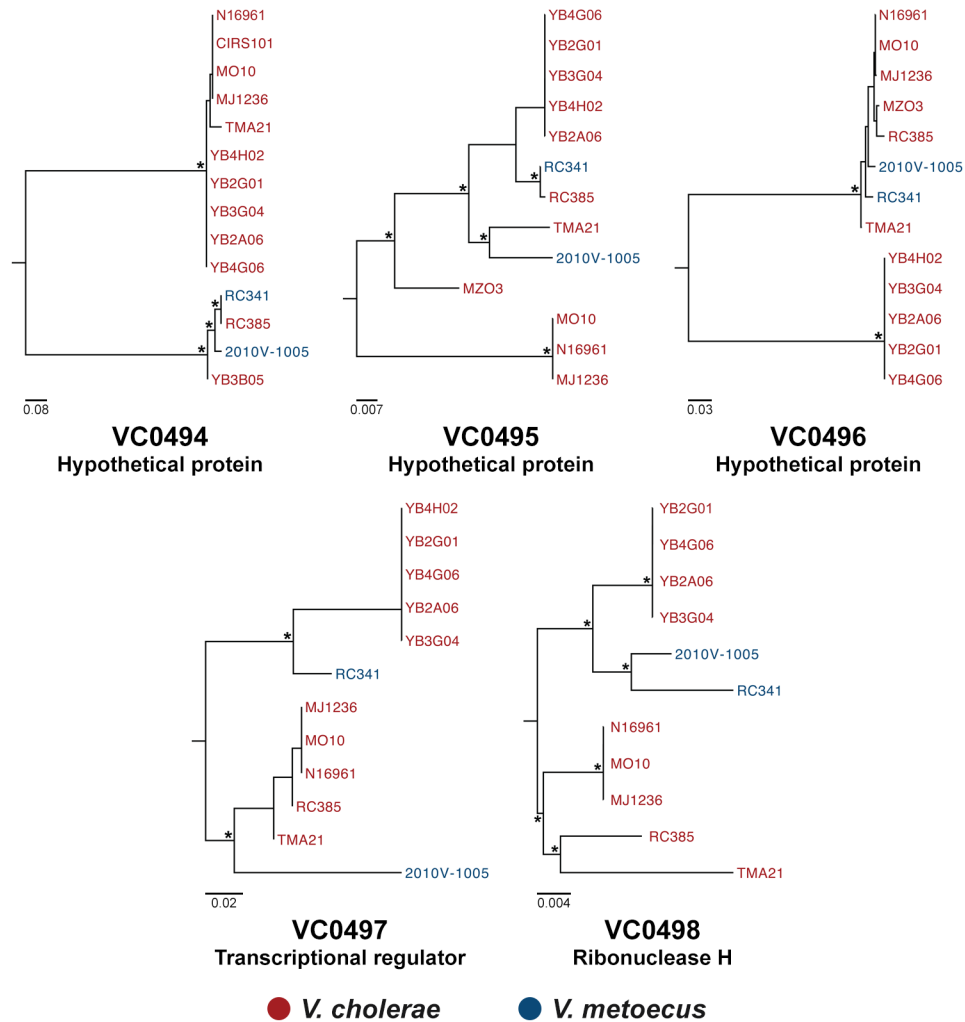

**Fig. S3.** – ML phylogenetic trees of orthologous gene families of the core VSP-2 (5' end, VC0494-VC0498) with reliable bootstrap support (5 out of 5 gene families). Relevant bootstrap support (>70%) is indicated with \*. The scale bars represent nucleotide substitutions per site. The 3' end (VC0504-VC0510) did not produce trees with reliable bootstrap support.

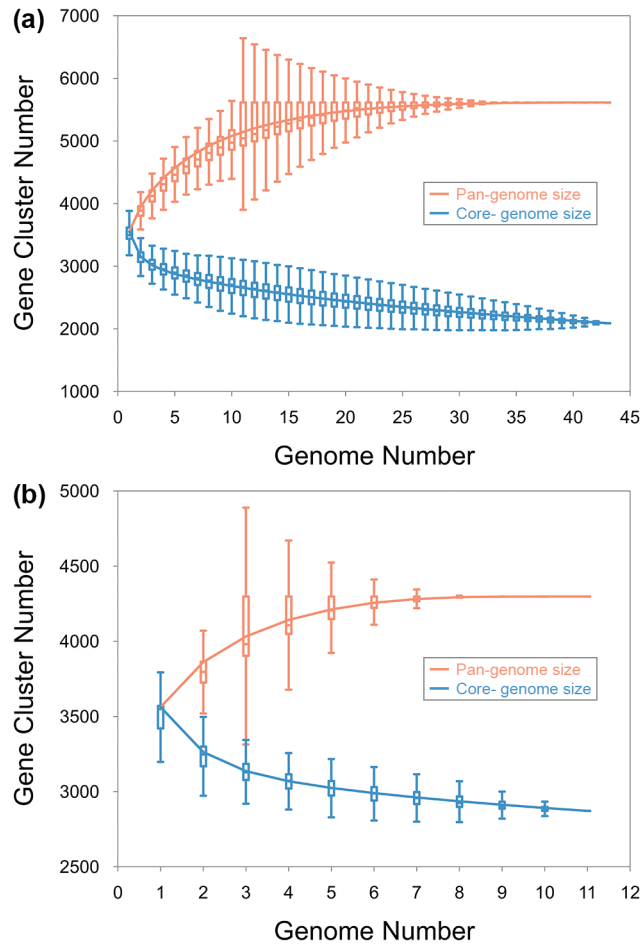

**Fig. S4.** – The pan-genome and core genome profiles for (a) *V. cholerae* based on 42 genomes and (b) *V. metoecus* based on 10 genomes. Graphs show the number of gene clusters (families) with every addition of a genome into the gene pool.

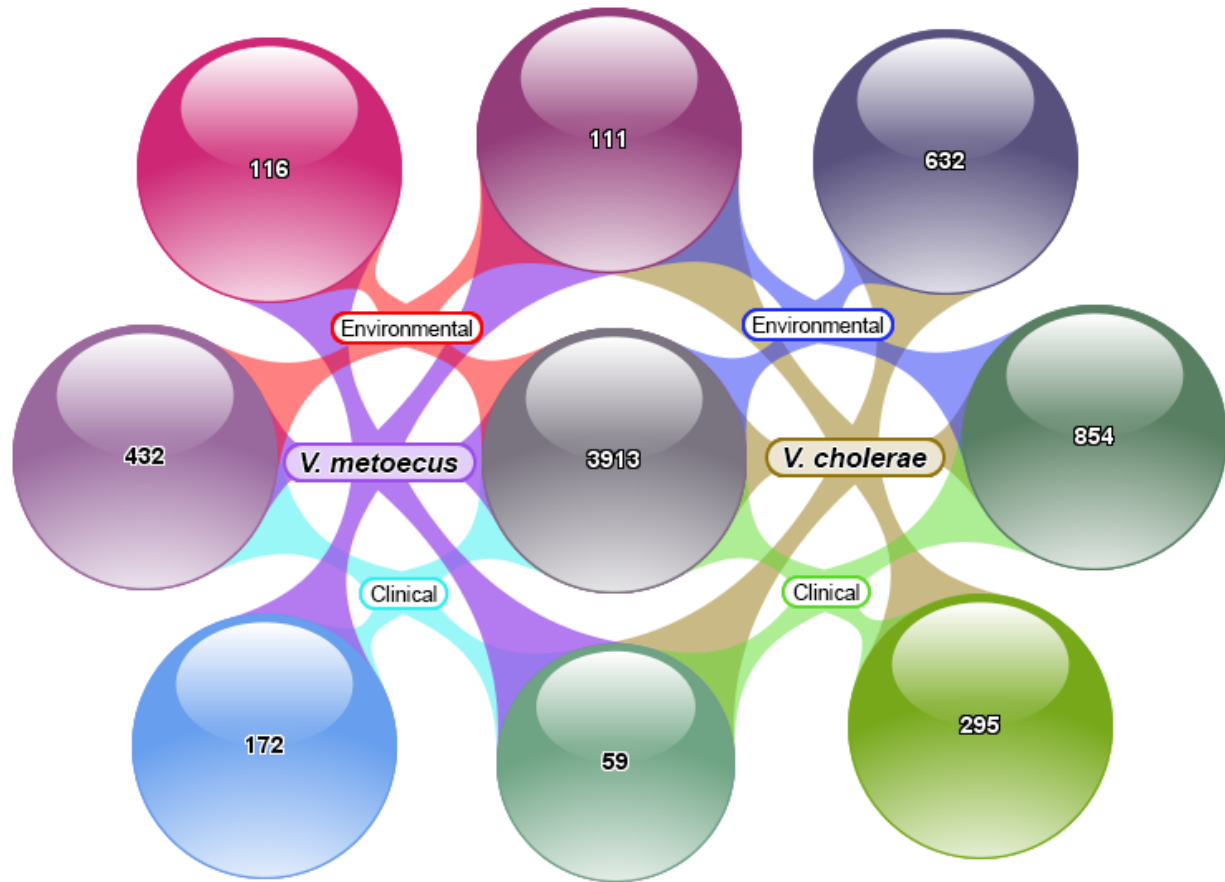

**Fig. S5.** – Cluster diagram of all orthologous gene families of the *V. metoecus*-*V. cholerae* pan-genome. Numbers indicate gene families containing members of various groups of strains. Clockwise from top left bubble: environmental *V. metoecus* only (116), environmental *V. metoecus* and *V. cholerae* (111), environmental *V. cholerae* only (632), environmental and clinical *V. cholerae* (854), clinical *V. cholerae* only (295), clinical *V. metoecus* and *V. cholerae* (59), clinical *V. metoecus* only (172), environmental and clinical *V. metoecus* (432). The gene families in the middle bubble contain environmental and clinical *V. metoecus* and *V. cholerae* members (3,913).

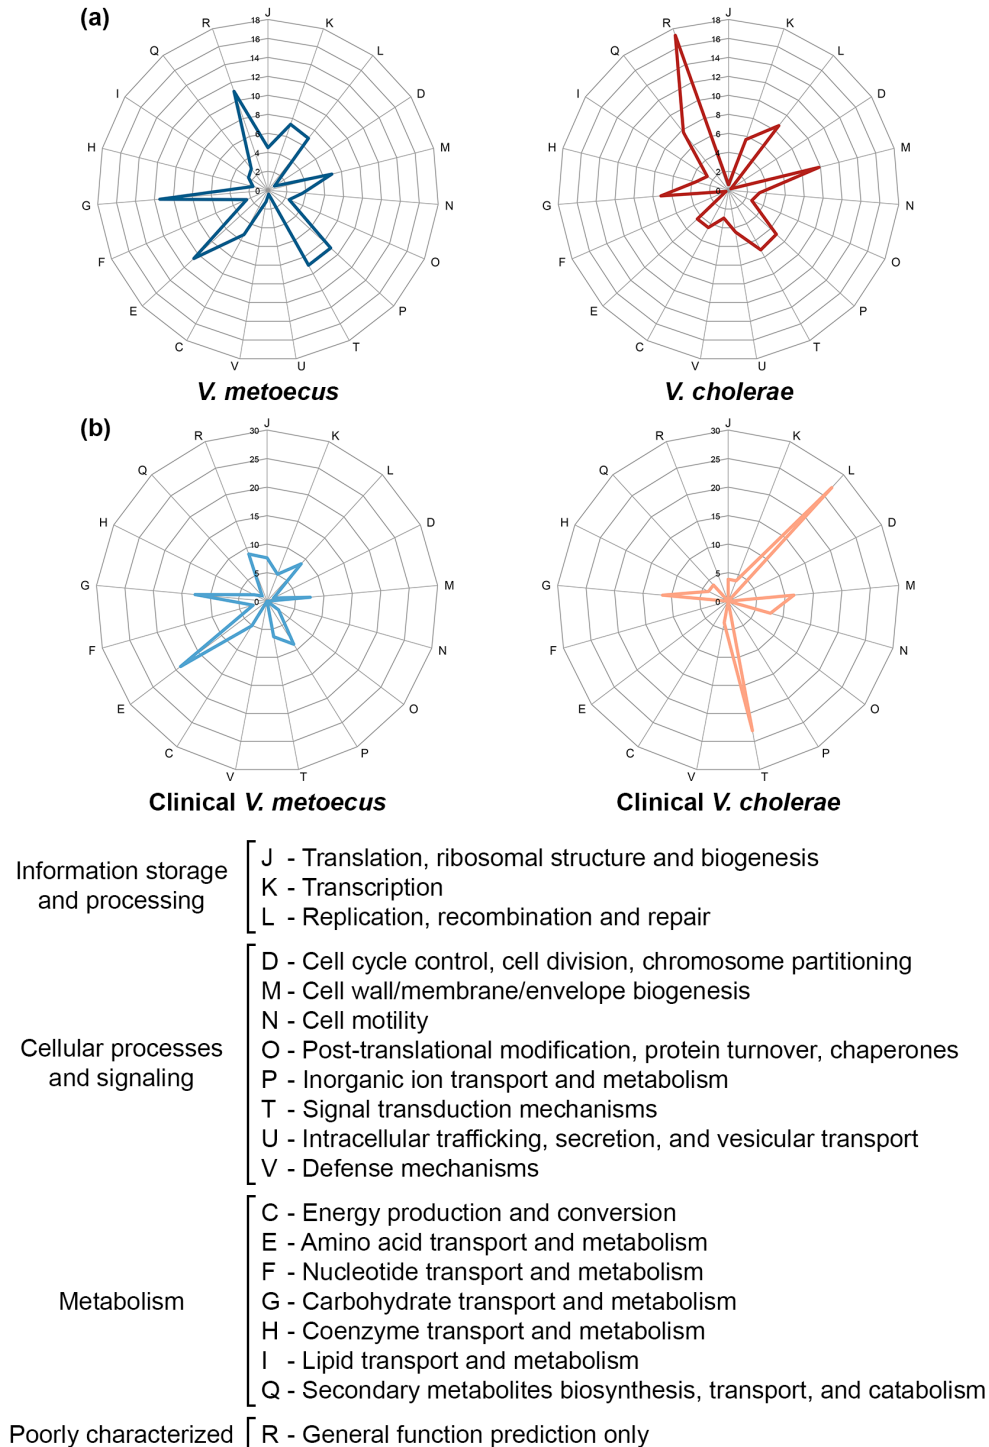

**Fig. S6.** – Comparison of orthologous gene families and their abundance, uniquely found in (a) *V. metoecus* or *V. cholerae* and (b) clinical *V. metoecus* or clinical *V. cholerae*. Functional roles for genes were predicted based on the COG database. The numbers on the charts represent percentage of genes in a COG category. Genes categorized as “function unknown” or not assigned into a COG category because there is no similarity to the database are not included.
